# Supplementary material for: Evolutionary and developmental analysis reveals KANK genes were co-opted for vertebrate vascular development
Source: PubMed Central journal article supplement (PMC4904190; doi:10.1038/srep27816), 2016-06-13
Supplement: srep27816-s1.pdf [file srep27816-s1.pdf]

# Evolutionary and developmental analysis reveals *KANK* genes were co-opted for vertebrate vascular development

Monica R. Hensley<sup>1\*</sup>, Zhibin Cui<sup>1\*</sup>, Rhys F.M. Chua<sup>1</sup>, Stefanie Simpson<sup>1</sup>, Nicole L. Shammass<sup>1</sup>, Jer-Yen Yang<sup>2,3</sup>, Yuk Fai Leung<sup>4,5</sup>, GuangJun Zhang<sup>1,2,5,6#</sup>

## Supplementary Information

### Supplementary Figures

**Figure S1. Maximum likelihood phylogeny of *KANK* proteins, as obtained with JTT plus gamma distances.** Numbers around each node indicate bootstrap values based on 1,000 replicates. Branch lengths are proportional to expected replacements per site. Consistent with BP phylogeny, the vertebrate *KANK*s forms four groups. The tree was rooted with *Tricolpax* and *Hydra*.

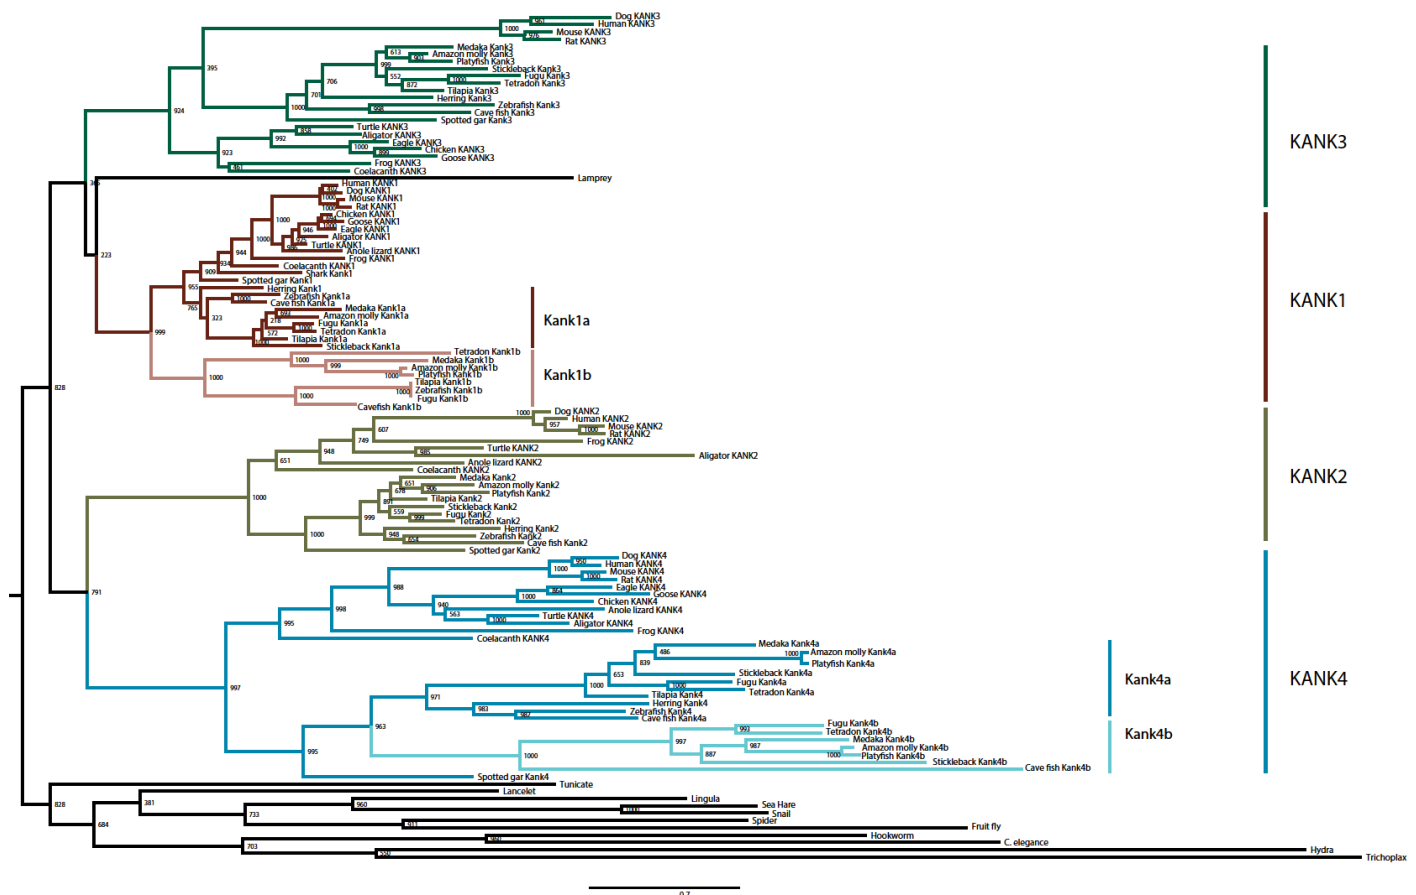

**Figure S2. Comparison of the KANK protein domains of human and zebrafish.** (a). Human KANK protein domains. (b). Zebrafish Kank protein domains. Purple bars indicate low compositional complexity regions. Green bars represent coiled-coil regions. Vertical colored thin lines show the intron positions. KN motif and ankyrin repeats are shown in square boxes with “KN-motif” and “ANK” respectively. A ruler with amino acid numbers is below each protein diagram.

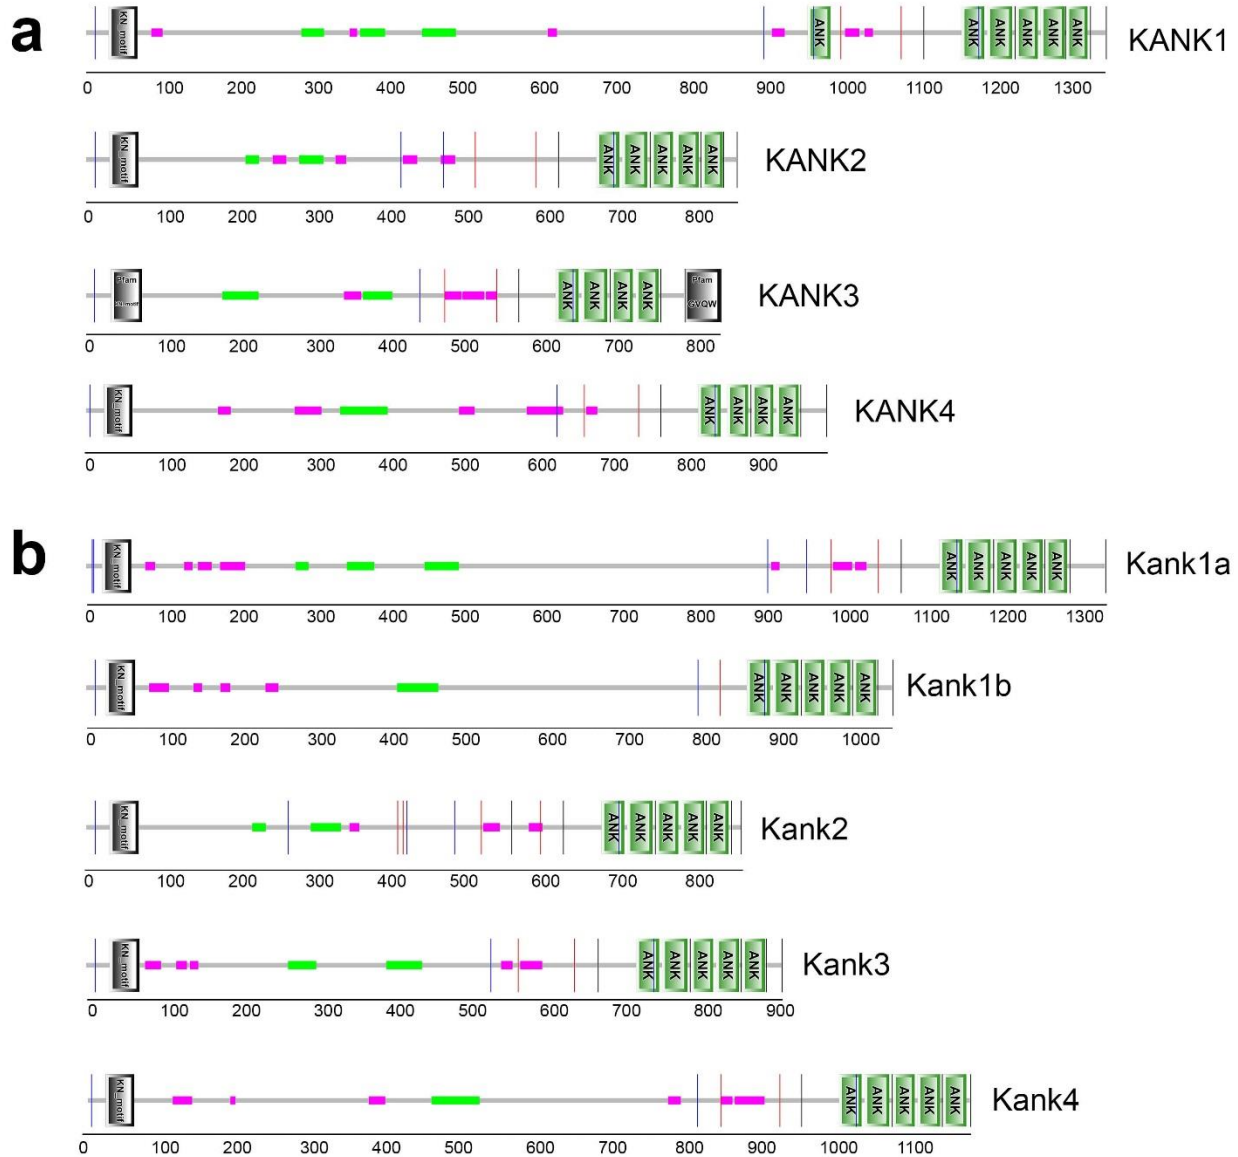

**Figure S3. Zebrafish *kank1a* and *kank1b* have different intron-exon structures.**

These gene structures were retrieved from Ensembl using the longest transcripts. (a) Spotted gar *kank1*, Transcript: *kank1*-201 ENSLOCT00000014107. (b) Human *KANK1*, Transcript: *KANK1*-001 ENST00000382303. (c) Zebrafish *kank1a*, *kank1*-001 ENSDART00000136521. (d) Zebrafish *kank1b*, Transcript: *KANK1* (2 of 2)-201 ENSDART00000085512. The solid red boxes represent the gene coding regions, and the empty boxes indicate untranscribed regions. Red lines indicate the introns.

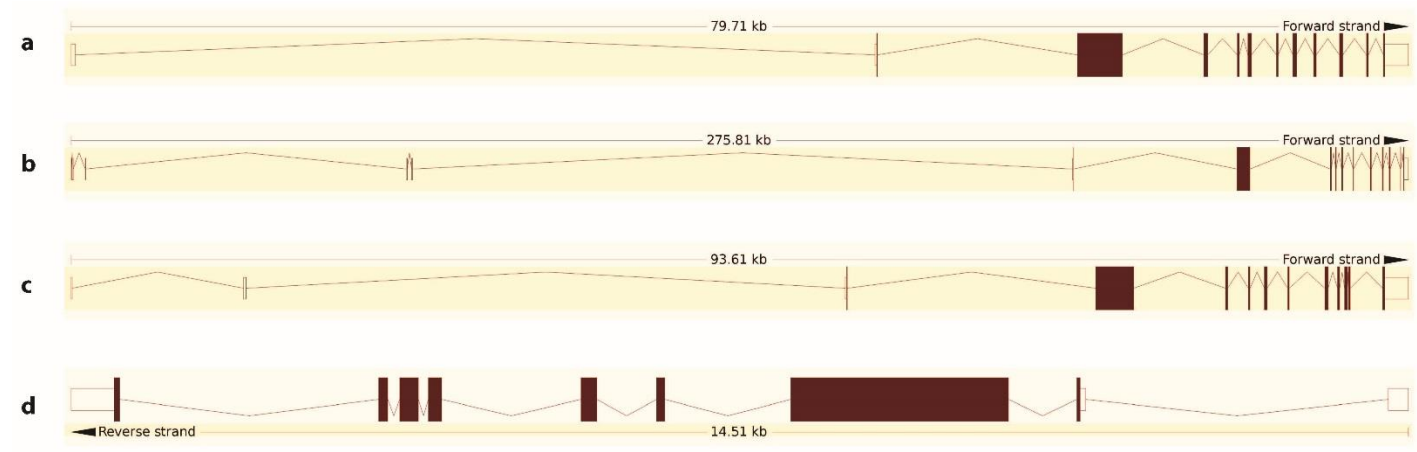

## Supplementary Table

**Table S1. The sources of KANK protein sequences used for the phylogenetic analyses.**

| Common name       | Scientific name                | KANK1 or Kank1a                                                                                                                          | Kank1b                                                   | KANK2                         | KANK3                         | KANK4 or Kank4a                 | Kank4b                                   |
|-------------------|--------------------------------|------------------------------------------------------------------------------------------------------------------------------------------|----------------------------------------------------------|-------------------------------|-------------------------------|---------------------------------|------------------------------------------|
| Alligator         | <i>Alligator sinensis</i>      | XP_006022667.1                                                                                                                           |                                                          | XP_006023540.1                | XP_014376372.1                | XP_006027522.1                  |                                          |
| Amazon molly      | <i>Poecilia formosa</i>        | kank1-201 ENSPFOT00000001152                                                                                                             | si:dkey-226m8.9-201 ENSPFOT00000010906                   | kank2-201 ENSPFOT00000029317  | kank3-201 ENSPFOT00000000137  | a: kank4-201 ENSPFOT00000006984 | b: KANK4 (2 of 2)-201 ENSPFOT00000023801 |
| Anole lizard      | <i>Anolis carolinensis</i>     | XP_008101527.1                                                                                                                           |                                                          | XP_008101990.1                |                               | XP_008107551.1                  |                                          |
| Atlantic herring  | <i>Clupea harengus</i>         | XP_012684054.1                                                                                                                           |                                                          | XP_012689245.1                | XP_012695057.1                | XP_012697624.1                  |                                          |
| <i>C. elegans</i> | <i>Caenorhabditis elegans</i>  | T22D2.1                                                                                                                                  |                                                          |                               |                               |                                 |                                          |
| Cave fish         | <i>Astyanax mexicanus</i>      | kank1-201 ENSAMXT00000012876                                                                                                             | XP_007257032.1 OR si:dkey-226m8.9-201 ENSAMXT00000012956 | XP_007238267.1                | kank3-201 ENSAMXT00000014761  | kank4-201 ENSAMXT00000010815    | XP_007250784.1                           |
| Chick             | <i>Gallus gallus</i>           | KANK1-201 ENSGALT00000016515                                                                                                             |                                                          |                               | KANK3-201 ENSGALT00000041280  | XP_422516                       |                                          |
| Coelacanth        | <i>Latimeria chalumnae</i>     | XP_006001260                                                                                                                             |                                                          | XP_005994226.1                | XP_005989925.1                | XP_014352296.1                  |                                          |
| Dog               | <i>Canis lupus familiaris</i>  | KANK1-201 ENSCAFT00000003130                                                                                                             |                                                          | KANK2-201 ENSCAFT000000027519 | KANK3-202 ENSCAFT000000029379 | KANK4-201 ENSCAFT000000049528   |                                          |
| Frog              | <i>Xenopus tropicalis</i>      | ANKRD15-201 ENSXETT00000004865                                                                                                           |                                                          | XP_002942889.2                | XP_002938597                  | XP_002931658                    |                                          |
| Fugu              | <i>Takifugu rubripes</i>       | kank1-203 ENSTRUT00000040327                                                                                                             | si:dkey-226m8.9-201 ENSTRUT00000047389                   | kank2-202 ENSTRUT00000028247  | kank3-202 ENSTRUT00000018377  | kank4-202 ENSTRUT00000047507    | b: XP_011614899.1                        |
| Fruit fly         | <i>Drosophila melanogaster</i> | CG10249 FBgn0027596                                                                                                                      |                                                          |                               |                               |                                 |                                          |
| Elephant shark    | <i>Callorhynchus milii</i>     | NCBI AFO94041                                                                                                                            |                                                          |                               |                               |                                 |                                          |
| Golden eagle      | <i>Aquila chrysaetos</i>       | XP_011588687.1                                                                                                                           |                                                          |                               | XP_011591736.1                | XP_011570405.1                  |                                          |
| Hookworm          | <i>Ancylostoma ceylanicum</i>  | EYC07694.1                                                                                                                               |                                                          |                               |                               |                                 |                                          |
| Human             | <i>Homo sapiens</i>            | KANK1-201 ENST00000619269                                                                                                                |                                                          | KANK2-003 ENST00000589359     | KANK3-002 ENST00000593649     | KANK4-001 ENST00000371153       |                                          |
| Hydra             | <i>Hydra vulgaris</i>          | XP_012562942.1                                                                                                                           |                                                          |                               |                               |                                 |                                          |
| Lamprey           | <i>Lethenteron japonicum</i>   | JL1710 unnamed protein product 1-727 ( <a href="http://jlampreygenome.imcb.a-star.edu.sg">http://jlampreygenome.imcb.a-star.edu.sg</a> ) |                                                          |                               |                               |                                 |                                          |
| Lancelet          | <i>Branchiostoma belcheri</i>  | BbP_088960R ( <a href="http://mosas.sysu.edu.cn/genome/index.php">http://mosas.sysu.edu.cn/genome/index.php</a> )                        |                                                          |                               |                               |                                 |                                          |

|                |                               |                               |                                               |                                        |                                     |                                                 |                                                 |
|----------------|-------------------------------|-------------------------------|-----------------------------------------------|----------------------------------------|-------------------------------------|-------------------------------------------------|-------------------------------------------------|
| Lingula        | <i>Lingula anatina</i>        | XP_013392739.1                |                                               |                                        |                                     |                                                 |                                                 |
| Medaka         | <i>Oryzias latipes</i>        | XP_011471394.1                | XP_011479791.1                                | KIAA0172-201<br>ENSORLT000000067<br>22 | XP_011472324.1                      | a: kank4-201<br>ENSORLT000000132<br>00          | XP_011484789.1                                  |
| Mouse          | <i>Mus musculus</i>           | Kank1-001 ENSMUST00000049400  |                                               | Kank2-201<br>ENSMUST000000347<br>17    | Kank3-001<br>ENSMUST000000485<br>60 | Kank4-001<br>ENSMUST000001027<br>90             |                                                 |
| Painted turtle | <i>Chrysemys picta</i>        | XP_005296814.1                |                                               | XP_008173664.1                         | XP_005283841.1                      | XP_008166090.1                                  |                                                 |
| Platyfish      | <i>Xiphophorus maculatus</i>  |                               | XP_014327830.1                                | kank2-201<br>ENSXMAT000000001<br>94    | kank3-201<br>ENSXMAT000000024<br>86 | a: XP_014326532.1                               | b: XP_014328965.1                               |
| Rat            | <i>Rattus norvegicus</i>      | Kank1-201 ENSRNOT00000021496  |                                               | Kank2-201<br>ENSRNOT000000141<br>35    | Kank3-201<br>ENSRNOT000000095<br>32 | Kank4-201<br>ENSRNOT000000661<br>39             |                                                 |
| Sea hare       | <i>Aplysia californica</i>    | XP_005108295.2                |                                               |                                        |                                     |                                                 |                                                 |
| Spider         | <i>Stegodyphus mimosarum</i>  | KFM78514.1                    |                                               |                                        |                                     |                                                 |                                                 |
| Snail          | <i>Biomphalaria glabrata</i>  | XP_013078178.1                |                                               |                                        |                                     |                                                 |                                                 |
| Spotted gar    | <i>Lepisosteus oculatus</i>   | kank1-201 ENSLOCT00000014107  |                                               | XP_006631656.1                         | kank3-201<br>ENSLOCT000000031<br>17 | kank4-201<br>ENSLOCT000000078<br>96             |                                                 |
| Stickleback    | <i>Gasterosteus aculeatus</i> | kank1-201 ENSGACT00000019197  |                                               | kank2-201<br>ENSGACT000000183<br>46    | kank3-201<br>ENSGACT000000108<br>86 | a: kank4-201<br>ENSGACT000000090<br>94          | b: KANK4 (2 of 2)-201<br>ENSGACT000000214<br>28 |
| Swan goose     | <i>Anser cygnoides</i>        | XP_013047600.1                |                                               |                                        | XP_013051691.1                      | XP_013031592.1                                  |                                                 |
| Tetradon       | <i>Tetraodon nigroviridis</i> | kank1-202 ENSTNIT00000001422  | KANK1 (1 of 2)-201<br>ENSTNIT0000001047<br>9  | kank2-201<br>ENSTNIT0000002198<br>4    | kank3-201<br>ENSTNIT0000001329<br>0 | a: KANK4 (1 of 2)-201<br>ENSTNIT0000001085<br>2 | kank4-201<br>ENSTNIT0000002149<br>6             |
| Tilapia        | <i>Oreochromis niloticus</i>  | kank1-201 ENSONIT00000017876  | si:dkey-226m8.9-201<br>ENSONIT000000140<br>23 | kank2-201<br>ENSONIT000000019<br>05    | kank3-201<br>ENSONIT000000159<br>98 | kank4-201<br>ENSONIT000000111<br>21             |                                                 |
| Trichoplax     | <i>Trichoplax adhaerens</i>   | XP_002114910.1 OR TriadT58901 |                                               |                                        |                                     |                                                 |                                                 |
| Tunicate       | <i>Ciona intestinalis</i>     | ENSCINT00000023213            |                                               |                                        |                                     |                                                 |                                                 |
| Zebrafish      | <i>Danio rerio</i>            | kank1-001 ENSDART00000136521  | si:dkey-226m8.9-201<br>ENSDART000000855<br>12 | kank2-001<br>ENSDART000001540<br>31    | kank3-201<br>ENSDART000001150<br>50 | kank4-001<br>ENSDART000001557<br>90             |                                                 |

## Supplementary File

### Supplementary File 1: KANK protein alignment

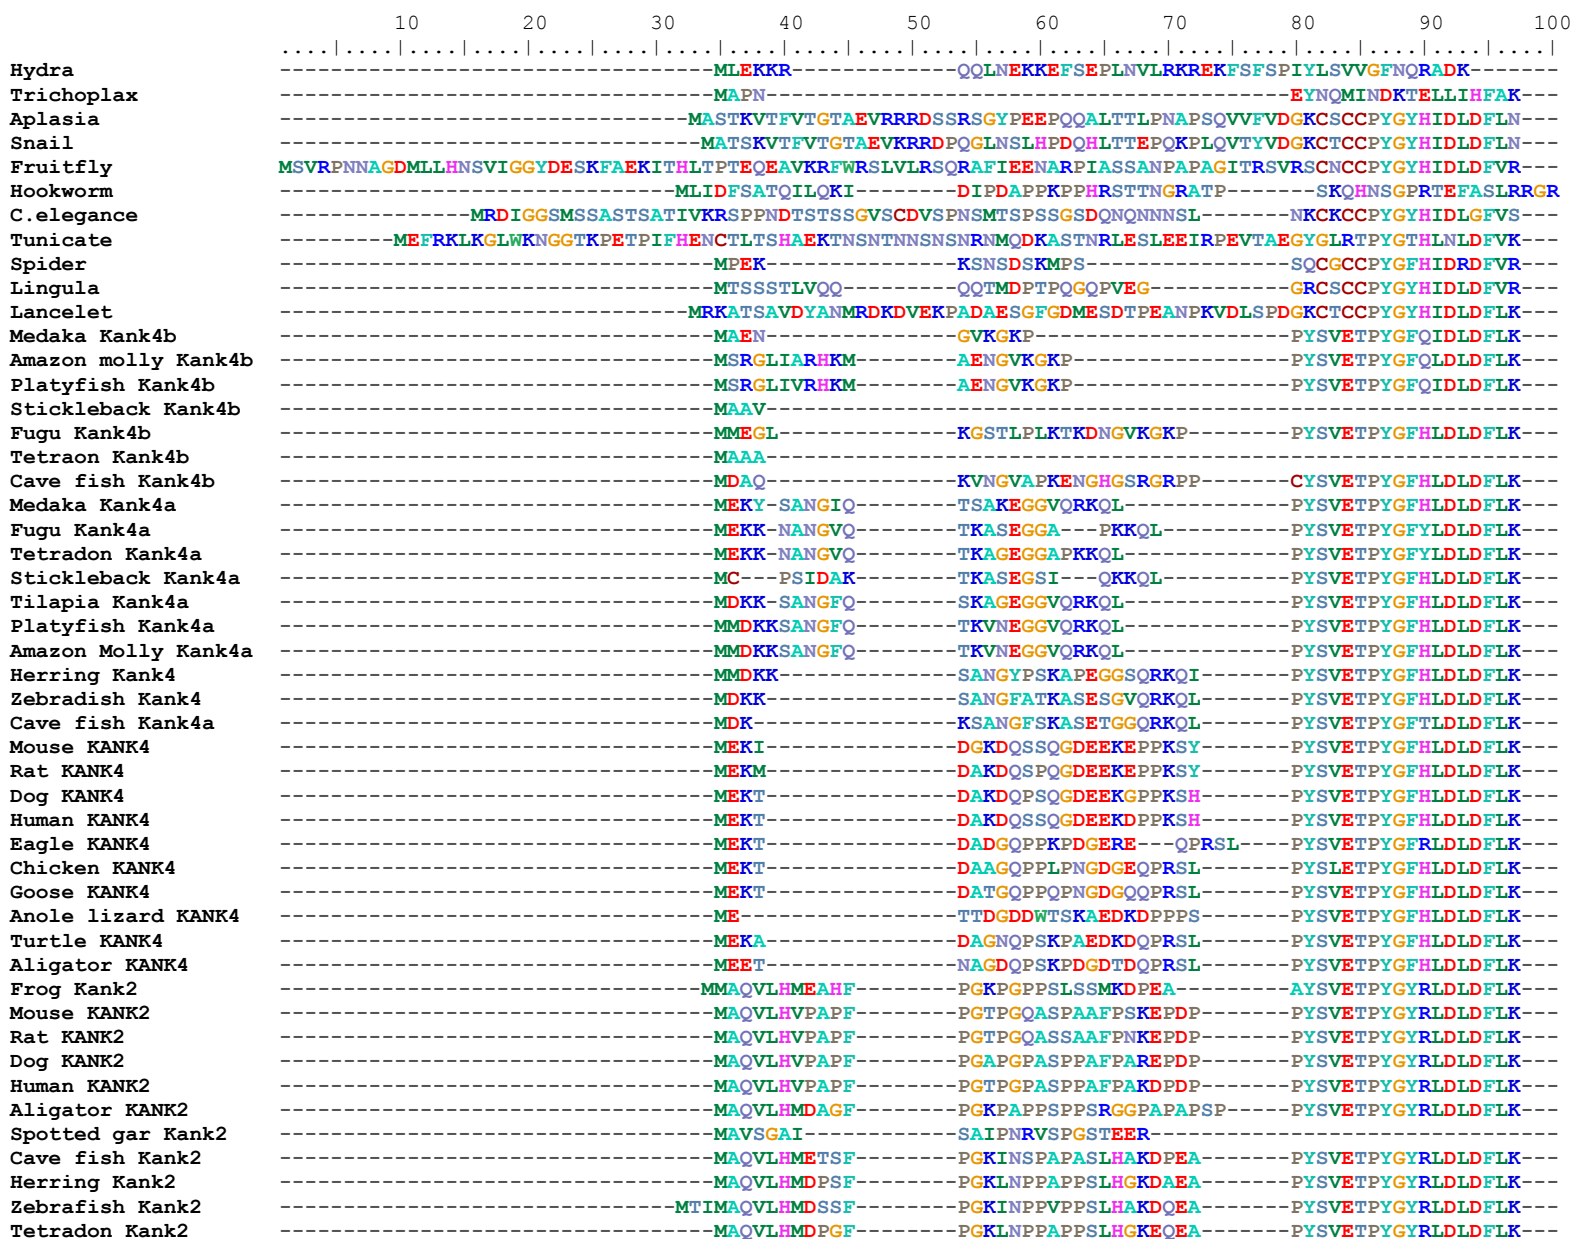

|                     |                                                                            |
|---------------------|----------------------------------------------------------------------------|
| Fugu Kank2          | -----MAQVLHMDPGF-----PGKLNPSAPPSLHGKEQEA-----PYSVETPYGYRLDLDLFLK---        |
| Medaka Kank2        | -----MAQVLHMDPTF-----PGKLNPPAPPSLHAKQEA-----PYSVETPYGYRLDLDLFLK---         |
| Sticklebacc Kank2   | -----MAQVLHMDPGF-----PGKLNPPAPPSLHGKEQEA-----PYSVETPYGYRLDLDLFLK---        |
| Tilapia Kank2       | -----MAQVLHMDPGF-----PGKLNPPAPPSLHAKQEA-----PYSVETPYGYRLDLDLFLK---         |
| Amazon molly Kank2  | -----MAQVLHMDPGF-----PGKLNPPAPPSLHGKEQEA-----PYSVETPYGYRLDLDLFLK---        |
| Platyfish Kank2     | -----MAQVLHMDPGF-----PGKLNPPAPPSLHGKEQEA-----PYSVETPYGYRLDLDLFLK---        |
| Coelacanth KANK2    | -----MAQVLHMETNF-----PGKSNPTSPATFRGKQDL-----PYSVETPYGYRLDLDLFLK---         |
| Anole lizard KANK2  | -----MAQVLHMETAF-----PGKPNPTSATSFHAKQDM-----PYSVETPYGYRLDLDLFLK---         |
| Turtle KANK2        | -----MAQVLHMESSF-----PGKPTPTSPATFGAQEPPL-----PYSVETPYGYRLDLDLFLK---        |
| Tetradon Kank1b     | -----KTIP-----ETPKQTDLE-----                                               |
| Medaka Kank1b       | -----MAQGSYTLRLV-----SGPNAAEAI-----PTHLGVDYNYQLD-----                      |
| Amazon molly Kank1b | -----                                                                      |
| Platyfish Kank1b    | -----MAQNNYILRNV-----PGQKSKDCI-----PEYQGTESHYPLDLGGIQ-----                 |
| Frog Kank4          | -----MERT-----NGEDILSKTEKKEKRM-----SYSVETPYGFHLDDLFLK-----                 |
| Zebrafish Kank1b    | -----MTQETHFHPNQ-----QDWEITSDAFQKS-----PFSVNTPYGYQLDLDFVK-----             |
| Tilapia Kank1b      | -----MTQETHFHPNQ-----QDWEITSDAFQKS-----PFSVNTPYGYQLDLDFVK-----             |
| Fugu Kank1b         | -----MTQETHFHPNQ-----QDWEITSDAFQKS-----PFSVNTPYGYQLDLDFVK-----             |
| Cavefish Kank1b     | -----MAQETYIYMNV-----ADTLESSANTYHSS-----SFCSTPYGYQLDLDFVK-----             |
| Spotted gar Kank4   | -----MNKS-----NANGLSSKPCSEGGQRKQL-----PYSVETPYGFHLDDLFLK-----              |
| Coelacanth KANK4    | -----MAVPERQPAQAEKHREHVI FVPGNGDSSKTSSENGNQKQL-----PYSLETGYGFHLDDLFLK----- |
| Frog Kank1          | -----MEQAEENLNGNIYKGYCGDNTGDEENIQIGENDKGGNA-----AYFVETPYGYQLDLDFLK-----    |
| Shark Kank1         | -----MAHTVINEVS-----PEKGEASLNGEDEKDPQS-----PYSVETPYGYQIDLDFLK-----         |
| Coelacanth KANK1    | -----MAHTTQTNGSI-----SEKGNVNVGEDDKDTQA-----PYFVETPYGYQLDLDFLK-----         |
| Mouse KANK1         | -----MAYTTKVGCA-----AEKADGVLNGDHNKEKKD-----PYFVETPYGFQLDLDFVK-----         |
| Rat KANK1           | -----MAYTTKVG-----CENADGVLNGDRNKEKKD-----PYFVETPYGFQLDLDFVK-----           |
| Dog KANK1           | -----MAHTTKVGCA-----SGKADVLNGDHDKEQKD-----PYFVETPYGYQLDLDFLK-----          |
| Human KANK1         | -----MAHTTKVNGSA-----SGKAGDILSGDQDKEQKD-----PYFVETPYGYQLDLDFLK-----        |
| Anole lizard KANK1  | -----MAHPVNINGGS-----TEKDENALNGEDERDQKD-----PYFVETPYGYQLDLDFLK-----        |
| Eagle KANK1         | -----MKLRQPYVAGKFAVWGQRHVANSEKEEVTINGDDEKERKD-----PYFVETPYGYQLDLDFLK-----  |
| Chicken KANK1       | -----MAYPANTNGSA-----AEKEEVIINGKDENERKY-----PYFVETPYGYQLDLDFLK-----        |
| Goose KANK1         | -----MAYPANTNGSA-----AEKEEVAVNGEDEKERKD-----PYFVETPYGYQLDLDFLK-----        |
| Turtle KANK1        | -----MAYPATISGST-----SEKEEGVLSGEDDKEQKD-----PYFVETPYGYQLDLDFLK-----        |
| Aligator KANK1      | -----MAYTANINGNN-----SEKEESHNLGKDDKEQKD-----LYFVETPYGYQLDLDFLK-----        |
| Spotted gar Kank1   | -----MAQTAQINGSI-----AEKGGGLNADDDKDSL-----PYYLETGYGYQLDLDFLK-----          |
| Herring Kank1       | -----MAQTLHINGNV-----SEKDEGEKDPVA-----PYYLETGYGFQLDLDFLK-----              |
| Zebrafish Kank1a    | -----MAQTMHINGNA-----SEKDEDEKD-----PYCLETGYGYQLDLDFLK-----                 |
| Cave fish Kank1a    | -----MAQTMQLNGNT-----TEKDEEDKESVA-----PYYLETGYGYQLDLDFLK-----              |
| Stickleback Kank1a  | -----MAQTMHLVNGG-----SERGQRCPKSADEKDAAA-----PYSVETPYGYQLDLDFLK-----        |
| Medaka Kank1a       | -----MAQAAQVKGSS-----PGTVGGGEEKD-----SYYVETPYGYQLDLDFLK-----               |
| Fugu Kank1a         | -----                                                                      |
| Tetradon Kank1a     | -----                                                                      |
| Tilapia Kank1a      | -----                                                                      |
| Amazon molly Kank1a | -----MAQTVNVNGG-----PERAQTCPGAGDEKD-----SYYVETPYGYQLDLDFLK-----            |
| Mouse KANK3         | -----MAKFA-LNQNL-----PDLGGPPLYPGPTGSARSPSS-----PYSVETPYGFHLDDLFLK-----     |
| Rat KANK3           | -----MAKFA-LNQNL-----PDLGGPPLYPGPTGSARSPSS-----PYSVETPYGFHLDDLFLK-----     |
| Dog KANK3           | -----MAKFA-LNQNL-----PDLGGPRLCPGPTAGARSPSS-----PYSVETPYGFHLDDLFLK-----     |
| Human KANK3         | -----MAKFA-LNQNL-----PDLGGPRLCPVPAAGGARSPSS-----PYSVETPYGFHLDDLFLK-----    |
| Lamprey             | -----MTDAVGK-----ADAVTMAASPSTESRGAGNEHPERSDRCVGTAPCLAEASTSTAV-----         |
| Coelacanth KANK3    | -----MAQFVQLNQKL-----PDLGGPFQYREEENDKS-----LYSVETPYGFQLDLDFLK-----         |
| Frog Kank3          | -----MTQSIHLNQNL-----PDLGGPFLLYRDQDENKTI-----AYSVETPYGFQLDLDFLK-----       |
| Turtle KANK3        | -----MAQPIHLNQNL-----PDLGGPFLLYRDQDDGEKS-----SYSVETPYGFLLDDLFLK-----       |
| Aligator KANK3      | -----MAQPAHLNQNL-----PDLGGPFLLYRDQDDGEKS-----SYSVETAYGFTLDDLFLK-----       |
| Eagle KANK3         | -----MAQPAHLNQNL-----PDLGGPFLLYRDQDDGEKS-----SYSVETPYGFLLDDLFLK-----       |
| Chicken KANK3       | -----MAQPAHLNQNL-----PDLGGPFLLYRDQDDSEKS-----SYSVETPYGFLLDDLFLK-----       |
| Goose KANK3         | -----MAQPAHLNQNL-----PDLGGPFLLYRDQDDGEKS-----SYSVETPYGFLLDDLFLK-----       |
| Spotted gar Kank3   | -----MTQSVQLNQKL-----PDVGTFFLYSTQEEGDQGG-----SYSVQTPYGFQLDLDFLK-----       |
| Zebrafish Kank3     | -----MTQSVHITSKV-----PNLSAFPHCSEEEESDQSG-----AYSVQTPYGFELDDLFLK-----       |

```

Cavefish Kank3      -----MTQSVQINPKL-----PNLGAPFQCATQEEEDQSA-----SYSVQTPYGFQLDLDFLK---
Herring Kank3      -----MTQSVQVNSKL-----PDLGAPFLYGSQEEEDQAG-----SYSVQTPYGFQLDLDFLK---
Stickleback Kank3  -----MTQSVQVNPVKL-----PDLGSPFFIYSAQEDADQSG-----SYSVQTPYGFQLDLDFLK---
Fugu Kank3         -----MTQSVQVMNPKL-----PDLGSPFFMYPSQGEEDQPA-----SYSVQTPYGFQLDLDFLK---
Tetradon Kank3     -----MAQSVQMNPNL-----PDLASPFICSGRGEEDQPG-----SYSVQTPYGFQLDLDFLK---
Medaka Kank3       -----MSQSVQVNPVKM-----PDLGSKFLYSSQEEADQSS-----SYSVQTPYGFQLDLDFLK---
Tilapia Kank3      -----MTQSVQVNPVKL-----PDLGSPFFHYPSQEEADQQA-----SYSVQTPYGFQLDLDFLK---
Amazon molly Kank3-----MTQSVQVNPVKV-----PDIGSAFIYSSQEEADQSG-----SYSVQTPYGFQLDLDFLK---
Platyfish Kank3    -----MTQSVQVNPVKV-----PDLGSAFIYSGQEEADQSG-----SYSVQTPYGFQLDLDFLK---

```

110 120 130 140 150 160 170 180 190 200

```

Hydra               -FTDTS CDSAK--VFKDVG VQ--KSLNYPV-----MKDIGINV-----
Trichoplax         AIID-----LMNQLTVN-----
Aplasia            -FCR-DVEGGSTLRNLKRIQRA--KRKLRKS--MEIMLDEQEGIAADPNSAPPDV--
Snail              -FCR-DIEEGS--TLRNLKRI--RRNKKLRKSMELMLDEQEGRTFDPSAPPDI--
Fruitfly          -YCE-AL--ALEKPS EEEQRRRDRRRS--RK-----SMEFMLGF-----
Hookworm          EYAVSDTE NAH--RVRYYSAS--PKMPR--K-----LQAVPPLP-----
C.elegance        -YAQ-NVSNQ--FVSRQGTP-----TNMTLRGN-----
Tunicate          -YCE-ELMSGQ--SFKRTSSF--RRPR-----SRTASQAS-----
Spider            -YCD-SLYNTA--QLDKLRQH--KRERRKE-----KKTVE SYL-----
Lingula           -YCE-DSQSGTMLKQLKRIKD--KKRLRKS-----MEVQLQGG-----
Lancelet          -YCD-DISKGS--NIPKIVRP--RKPKSPG--GPAPMDFR--ANTLPRGFYLSNQSNLPKHASVVPSSPISPLSVNTSLSSANN SIPETTTT
Medaka Kank4b     -YVE-DIEKGN--TIKRVP IQ--RRSKGPR-----ASTLPRNL-----
Amazon molly Kank4b -YVD-DIEKGN--TIKRVP IQ--RRSKGSR-----ASTLPRHL-----
Platyfish Kank4b  -YVD-DIEKGN--TIKRVP IQ--RRSKGPR-----ASTLPRHL-----
Stickleback Kank4b -YVD-DIEKGN--QVDGVPGE--RRM-----
Fugu Kank4b       -YVD-DIEKGN--TIRRIPIH--RRSKGPR-----ASTLPRHF-----
Tetraon Kank4b   -QVD-----
Cave fish Kank4b  -YVD-DIEKGN--TIRRVPIQ--RRQRGRT-----TGSLSRNL-----
Medaka Kank4a     -YVD-DIEKGN--TIKRVIH--RRIKGPAK-----FSTLPRNF-----
Fugu Kank4a       -YVD-DIEKGN--TIKRVIH--RRIKGPS-K-----FSTLPRNF-----
Tetradon Kank4a   -YVD-DIEKGN--TIKRVIH--RRIKGPP-K-----FSTLPRNF-----
Stickleback Kank4a -YVD-DIEKGN--TIKRVIH--RRVKSPA-K-----FSTLPRNF-----
Tilapia Kank4a    -YVD-DIEKGN--TIKRVIH--RRVKGPPK-----FSTLPRNF-----
Platyfish Kank4a  -YVD-DIEKGN--TIKRVIH--RRVKGPA-K-----FSTLPRNF-----
Amazon Molly Kank4a -YVD-DIEKGN--TIKRVIH--RRVKGPA-K-----FSTLPRNF-----
Herring Kank4     -YVD-DIEKGN--TIKRVIH--RKNRGPK-----YSTLPRNF-----
Zebradish Kank4   -YVD-DIEKGN--TIKRVIH--RKNRGPK-----YSTLPRNF-----
Cave fish Kank4a  -YVD-DIEKGN--TIKRVIH--RKNRGPK-----YSTLPRNF-----
Mouse KANK4       -YVD-DIEKGN--TIKRIP IH--RRAKQAK-----FSTLPRNF-----
Rat KANK4         -YVD-DIEKGN--TIKRIP IH--RRAKQAK-----FSTLPRNF-----
Dog KANK4         -YVD-DIEKGN--TIRRIPIH--RRAKQAK-----FSTLPRNF-----
Human KANK4       -YVD-DIEKGN--TIKRIP IH--RRAKQAK-----FSTLPRNF-----
Eagle KANK4       -YVD-DIEKGN--TIRRVHIH--RKAKQPK-----FSTLPRNF-----
Chicken KANK4     -YVD-DIEKGN--TIRRVHIH--RKAKQPK-----FSTLPRNF-----
Goose KANK4       -YVD-DIEKGN--TIRRVHIH--RKAKQPK-----FSTLPRNF-----
Anole lizard KANK4 -YVD-DIEKGN--TIKRIQ IH--RKTYPK-----FSTLPRNF-----
Turtle KANK4      -YVD-DIEKGN--TIKRVIH--RKAKQPK-----FSTLPRNF-----
Aligator KANK4    -YVD-DIEKGN--TIRRVHVH--RKAKQPK-----FSTLPRNF-----
Frog Kank2        -YVD-DIEKGN--TIKRVPVH--RRPR-----YGS LPRGP-----
Mouse KANK2       -YVD-DIEKGN--TLRRVAVQ--RRPR-----LGS LPRGP-----
Rat KANK2         -YVD-DIEKGN--TLRRVPVQ--RRPR-----LGS LPRGP-----
Dog KANK2         -YVD-DIEKGN--TLRRVAVQ--RRPR-----LGS LPRGP-----
Human KANK2       -YVD-DIEKGN--TLRRVAVQ--RRPR-----LSS LPRGP-----
Aligator KANK2    -YVD-DIEKGN--TLRRLPVR--RRPR-----
Spotted gar Kank2 -----RVCQLQMR-----SLSEPRGS-----

```



|                     |                                                           |
|---------------------|-----------------------------------------------------------|
| Cave fish Kank2     | -YVN-DIEKGN--TLKKVPVQ--RRPR-----YGSLEPRGY-----            |
| Herring Kank2       | -YVN-DIEKGN--TIKRVPVQ--RRPR-----YGSLEPRGY-----            |
| Zebrafish Kank2     | -YVN-DIEKGN--TIKKVPVQ--RRPR-----YGSLEPRGY-----            |
| Tetradon Kank2      | -YVN-DIEKGN--TIKKVAVQ--RRPR-----YGSLEPRGY-----            |
| Fugu Kank2          | -YVN-DIEKGN--TIKKVAVQ--RRPR-----YGSLEPRGY-----            |
| Medaka Kank2        | -YVN-DIEKGN--TIKKVSIQ--RRPR-----YGSLEPRGY-----            |
| Stickleback Kank2   | -YVN-DIEKGN--TIKKVPIQ--RRPR-----YGSLEPRGY-----            |
| Tilapia Kank2       | -YVN-DIEKGN--TIKKVPVQ--RRPR-----YGSLEPRGY-----            |
| Amazon molly Kank2  | -YVN-DIEKGN--TIKKVPIQ--RRPR-----YGSLEPRGY-----            |
| Platyfish Kank2     | -YVN-DIEKGN--TIKKVPIQ--RRPR-----YGSLEPRGY-----            |
| Coelacanth KANK2    | -YVD-DIEKGN--TIKKVPIH--RRPR-----YSSLEPRGY-----            |
| Anole lizard KANK2  | -YVD-DIEKGN--TIKKRIPVH--RRPR-----YSSLEPRGY-----           |
| Turtle KANK2        | -YVD-DIEKGN--TIKRVVPH--RRPR-----YGSLEPRGA-----            |
| Tetradon Kank1b     | -----VPNQAAPO--PRPRQRL-----                               |
| Medaka Kank1b       | -----RFQKGA--TIKRLSLK--RRPRVV-----LSDAEKTV-----           |
| Amazon molly Kank1b | -----MKRLSLK--RRPRGV-----LNDVEKSO-----                    |
| Platyfish Kank1b    | -NII-----TMKRLSLK--RRPRGV-----LNDVEKTO-----               |
| Frog Kank4          | -YVH-DIEKGN--TIKRVHIH--RRAKQSK-----FSTLERNF-----          |
| Zebrafish Kank1b    | -YVD-DIERSD--TIKRLRFN--KRPGVAN-----AASEPQHP-----          |
| Tilapia Kank1b      | -YVD-DIERSD--TIKRLRFN--KRPGVAN-----AASEPQHP-----          |
| Fugu Kank1b         | -YVD-DIERSD--TIKRLRFN--KRPGVAN-----AASEPQHP-----          |
| Cavefish Kank1b     | -YVD-DIEQSD--TIKRLGFN--RRPR-----ADPAPEAQ-----             |
| Spotted gar Kank4   | -YVD-DIEKGN--TIKRVHIH--RRAKDPK-----FSTLERNF-----          |
| Coelacanth KANK4    | -YVD-DIEKGN--TIKRVHIH--RKAKQPK-----YSTLERNF-----          |
| Frog Kank1          | -YVE-DIQKGN--TIKRVSLL--KRRKLV-----NLAEGRNP-----           |
| Shark Kank1         | -YVD-DIQKGN--TIKRVNIQ--RKPKVPK-----TLATRNA-----           |
| Coelacanth KANK1    | -YVD-DIQKGN--TIKRLNIQ--RKSVAK-----PIVTPKSA-----           |
| Mouse KANK1         | -YVD-DIQKGN--TIKRLNIQ--KRRKPSV-----PCPEVRAI-----          |
| Rat KANK1           | -YVD-DIQKGN--TIKRLNIQ--KRRKPSG-----PCAEVRAI-----          |
| Dog KANK1           | -YVD-DIQKGN--TIKRLNIP--KRRKPSV-----PCPESRAT-----          |
| Human KANK1         | -YVD-DIQKGN--TIKRLNIQ--KRRKPSV-----PCPEPRTT-----          |
| Anole lizard KANK1  | -YVE-DIQKGN--TIKRLNIQK--KRVIPP-----FATVKNTT-----          |
| Eagle KANK1         | -YVD-DIQKGN--TIKRLNIR--KRRKAVP-----ASAGTKNS-----          |
| Chicken KANK1       | -YVD-DIQKGN--TIKRLNIQ--KRRKAVP-----ASTSTKNA-----          |
| Goose KANK1         | -YVD-DIQKGN--TIKRLNIQ--KRRKAIP-----ASTGTKNS-----          |
| Turtle KANK1        | -YVD-DIQKGN--TIKRLNIQ--KRRKLV-----TFTGTKNS-----           |
| Aligator KANK1      | -YVD-DIQKGN--TIKRLNIQ--KRRKLV-----TFPGTKNS-----           |
| Spotted gar Kank1   | -YVD-DIERGN--TLKRLNIQ--RKPKVAK-----PVATPRSG-----          |
| Herring Kank1       | -YVD-DIERGN--TIKRLNFQ--RKPKSAR-----PSTSSQHS-----          |
| Zebrafish Kank1a    | -YVD-DIERGN--TIKRLNIQ--RKPKVVR-----TVPPRPS-----           |
| Cave fish Kank1a    | -YVD-DIERGN--TIKRLNIQ--RKPKVPR-----CVPSSQ-----            |
| Stickleback Kank1a  | -YVD-DIERGN--TIKRLSVH--RKPKGAT-----PSTSG-----             |
| Medaka Kank1a       | -YVE-DIERGN--TIKRLSIQ--RKPKVAR-----TPPAPRAS-----          |
| Fugu Kank1a         | -----                                                     |
| Tetradon Kank1a     | -----                                                     |
| Tilapia Kank1a      | -----                                                     |
| Amazon molly Kank1a | -YVD-DIERGN--TIKRLSIQ--RKPKAAR-----PLATPRGS-----          |
| Mouse KANK3         | -YVE-EIERGP--ASRRTPGPPHARRPRASRTGL-----AGARSPGA-----      |
| Rat KANK3           | -YVE-EIERGP--ASRRAPGPPHARRPRASG-----KGL-----AGARSPGA----- |
| Dog KANK3           | -YVE-EIERGP--APRRAPGPPHARRPRAPR-----AGLAGARS-----         |
| Human KANK3         | -YIE-EIERGP--AARRAPGPPHARRPRAPR-----PGLAGARS-----         |
| Lamprey             | -SCR-DAQSGTVAVEVRTVSVG--NCER-----YEDTRRSV-----            |
| Coelacanth KANK3    | -YVD-DIQSGQ--TLKRVNVQ--RKSHPAK-----PTTSLRSP-----          |
| Frog Kank3          | -YVD-DIQSGQ--TLKKVPVY--RKPRVPRQ-----STSSLRSP-----         |
| Turtle KANK3        | -YVD-DIESGQ--TLKKVPKH--RKAGPK-----Q-----QPSSLRSP-----     |
| Aligator KANK3      | -YVD-DIQSGQ--TLKKLH--RKAGPKQ-----QLSCLRSP-----            |
| Eagle KANK3         | -YVN-DIESGQ--TLKKVPLP--RRAKGARQ-----PPSALRSP-----         |

|                    |                                                       |
|--------------------|-------------------------------------------------------|
| Chicken KANK3      | -YVD-DIESGQ--TLKKVPLP--RRAKCTRL-----QPGLRSP-----      |
| Goose KANK3        | -YVD-DIESGQ--TLKKVPLP--RRAKGAR-----                   |
| Spotted gar Kank3  | -YVE-EIESGH--NFRRAPVNPR-RGPRSSK-----SGSLSRRS-----     |
| Zebrafish Kank3    | -YVE-EIESGH--SIRRAVNH--PRRG-----SRSDRRNL-----         |
| Cavefish Kank3     | -YVE-EIESGQ--SIRRAHMSV--RRPSRS-----DRGSQRSA-----      |
| Herring Kank3      | -YVE-EIESGH--TFRRTPVSSR-RGVRAGK-----LSQRS PGV-----    |
| Stickleback Kank3  | -YVE-EIESGH--NLRRAPLG--SRRSGRG-----ARLSQGA-----       |
| Fugu Kank3         | -YVE-EIESGH--HLRRAPVSSR-RSSRGTK-----LSLRS PSV-----    |
| Tetradon Kank3     | -YVE-EIESGH--NLRRAVPSR-RSSRGPR-----LSQRS PSV-----     |
| Medaka Kank3       | -YVE-EIESGH--NLRRAVSS--RRPGRGLK-----LSQRSASV-----     |
| Tilapia Kank3      | -YVE-EIESGH--NLRRAPISSR-RSGRGLK-----LSQRNPGV-----     |
| Amazon molly Kank3 | -YVE-EIESGH--NLRRAPLSS--RRPGRGLK-----LSQRS PSV-----   |
| Platyfish Kank3    | -YVE-EIESGH--NLRRAPLSS--RRPGRGL--K-----LSQRS PSV----- |

210      220      230      240      250      260      270      280      290      300

|                     |                                                                                                 |
|---------------------|-------------------------------------------------------------------------------------------------|
| Hydra               | ..... ..... ..... ..... ..... ..... ..... ..... ..... ..... ..... ..... ..... ..... ..... ..... |
| Trichoplax          | -----FLT---FL-DRACQTKTETND-----                                                                 |
| Aplasia             | -----S-ETSCPNNYESND-----                                                                        |
| Snail               | -----VHSTEAGRLMHMINYERSATHRILNQ--ID-TTVNTTIAGGGR-----HMSSDSD                                    |
| Fruitfly            | -----VHSTEAGRLMHMINYERSATHHILSQ--ID-SSVNTTIANIDG-----VRGRRYMSS                                  |
| Hookworm            | -----ESLFGGDWQA--E-SRVQKLGKSETSH-----ESEPDSPHPIGGGGSLHMSQSYTT                                   |
| C.elegance          | -----SASQFTYTH--NN-GNTMLAKTQGTS-----                                                            |
| Tunicate            | -----GADRHLMSV--LLDNSIFSDSLDNL-----                                                             |
| Spider              | -----GQQQVHYNT--RL-AGGPNESLDSL-----                                                             |
| Lingula             | -----GLGNICSSQ--YS-EPNLTTVROHNT-----LPNDFYL                                                     |
| Lancelet            | -----QIETDYEP--R-QEMVGYDSGTNR-----YLNDIDS                                                       |
| Medaka Kank4b       | TATTTKQIVTDPRENASSVYGYNSSTRPSPGDLPIPFTSPNSNSVFTM--P-AALATQSNSSSSSSLSQLSTQSSSQFSPHSEMSGDTKHS--   |
| Amazon molly Kank4b | -----NPSGCGYRP--SPWGSGALGPR-----                                                                |
| Platyfish Kank4b    | -----NSSGSGYKP--SPWRSTGALDPR-----                                                               |
| Stickleback Kank4b  | -----NSSGSGYKQ--NPWRSTGALDPR-----                                                               |
| Fugu Kank4b         | -----TASGWGS--T-GALGSRQLEASC-----                                                               |
| Tetraon Kank4b      | -----ANGSR-----                                                                                 |
| Cave fish Kank4b    | -----SLPGYGCSR--P-SQWNSTGILFPR-----                                                             |
| Medaka Kank4a       | -----SLPGHGVRPTLKDKSAWPGTSTLGP-----                                                             |
| Fugu Kank4a         | -----SLPGHGVRPVPKEKDSVSGTSTLGP-----                                                             |
| Tetradon Kank4a     | -----SLPGHGVRPVPKEKDSVSGTSTLGP-----                                                             |
| Stickleback Kank4a  | -----SLPGHGARPPPDKDSTVSGTSTLGP-----                                                             |
| Tilapia Kank4a      | -----SLPGHGVRPPPKEKDSVSGTSTLGP-----                                                             |
| Platyfish Kank4a    | -----SLPGHGVRP--PPKEGAWSGTSTLGP-----                                                            |
| Amazon Molly Kank4a | -----SLPGHGVRP--PSKEGAWSGTSTLGP-----                                                            |
| Herring Kank4       | -----SLPGHGARP--PPKDVMASGTSTLGP-----                                                            |
| Zebradish Kank4     | -----SLPGHGARP--LAKDTWANTSTLGS-----                                                             |
| Cave fish Kank4a    | -----SLPGHGARP--AAKDTWANTSTLGS-----                                                             |
| Mouse KANK4         | -----SLPNSGDR-----Y-AVPPQQNWSPVV-----                                                           |
| Rat KANK4           | -----SLPNSGDRS-----H-AAPPQQNWSPVV-----                                                          |
| Dog KANK4           | -----SLPDSRARP-----H-AALSHQNWSPVV-----                                                          |
| Human KANK4         | -----SLPDSGARP-----P-AAPPQQNWSPVV-----                                                          |
| Eagle KANK4         | -----SLPENSGR-----C-ASTPGKWAATR-----                                                            |
| Chicken KANK4       | -----SLPENSHG-----Y-AASTGPGWPAAT-----                                                           |
| Goose KANK4         | -----SLPENSGR-----YA-AALLLASSMPAA-----                                                          |
| Anole lizard KANK4  | -----SLPENSGRA--RNKNFIAQRKASLGA-----                                                            |
| Turtle KANK4        | -----SLPENSGRA--Y-ASSPNKSWTATC-----                                                             |
| Aligator KANK4      | -----SLPENSGRA--Y-AASSNKSWAFA-----                                                              |
| Frog Kank2          | -----GYTGSWWT-----T-ESLCSNASNDSR-----                                                           |
| Mouse KANK2         | -----GSWWT-----T-ESLCSNASGDSR-----                                                              |
| Rat KANK2           | -----GSWWT-----T-ESLCSNASGDSR-----                                                              |

|                     |                                                                                            |
|---------------------|--------------------------------------------------------------------------------------------|
| Dog KANK2           | -----G <b>SWWTS</b> -----T- <b>ESLCSNASGDSR</b> -----                                      |
| Human KANK2         | -----G <b>SWWTS</b> -----T- <b>ESLCSNASGDSR</b> -----                                      |
| Aligator KANK2      | -----C <b>ASASWWPS</b> -----T- <b>ESLCSTDSLASA</b> -----                                   |
| Spotted gar Kank2   | -----S <b>LGTGGFNF</b> -----                                                               |
| Cave fish Kank2     | -----G <b>YTG<b>SWWTS</b></b> -----T- <b>ESLCSNASVDSR</b> -----                            |
| Herring Kank2       | -----G <b>YTG<b>SWWTS</b></b> -----T- <b>ESLCSNTSVDSR</b> -----                            |
| Zebrafish Kank2     | -----G <b>YTG<b>SWWTS</b></b> -----T- <b>ESLCSNASMDSR</b> -----                            |
| Tetradon Kank2      | -----G <b>YAG<b>SWWTS</b></b> -----T- <b>ESLCSNASMDSR</b> -----                            |
| Fugu Kank2          | -----G <b>YTG<b>SWWTS</b></b> -----T- <b>ESLCSNTSIDSR</b> -----                            |
| Medaka Kank2        | -----G <b>YTG<b>SWWTS</b></b> -----T- <b>ESLCSNASMDSR</b> -----                            |
| Sticklebacc Kank2   | -----G <b>YTG<b>SWWTS</b></b> -----T- <b>ESLCSNTSMDSR</b> -----                            |
| Tilapia Kank2       | -----G <b>YTG<b>SWWTS</b></b> -----T- <b>ESLCSNASMDSR</b> -----                            |
| Amazon molly Kank2  | -----G <b>YTG<b>SWWTS</b></b> -----T- <b>ESLCSNASVESR</b> -----                            |
| Platyfish Kank2     | -----G <b>YTG<b>SWWTS</b></b> -----T- <b>ESLCSNASVESR</b> -----                            |
| Coelacanth KANK2    | -----G <b>YTG<b>SWWTS</b></b> -----T- <b>ESLCSNASMDSR</b> -----                            |
| Anole lizard KANK2  | -----G <b>YTG<b>SWWTS</b></b> -----T- <b>ESLCSNVSMDSH</b> -----                            |
| Turtle KANK2        | -----G <b>SWWTS</b> -----T- <b>ESLCSNASLDSR</b> -----                                      |
| Tetradon Kank1b     | -----A <b>SFGGVSSPGSA</b> -----                                                            |
| Medaka Kank1b       | -----S <b>SSQ<b>WHS</b></b> -----A- <b>ESLSSSSDDFR</b> -----LL <b>GMSSSA</b>               |
| Amazon molly Kank1b | -----S <b>GASSG<b>PVH</b></b> -----SA- <b>ESLSLPCNDGTR</b> -----LL <b>GMSSSAK</b>          |
| Platyfish Kank1b    | -----S <b>GSSCG<b>PVH</b></b> -----SA- <b>ESLSLPCNDGTR</b> -----LL <b>GMSSSAK</b>          |
| Frog Kank4          | -----S <b>VPDNGSQS</b> -----Y- <b>ISSSRTWSPTS</b> -----                                    |
| Zebrafish Kank1b    | -----I <b>NP<b>THR</b>ISS</b> -----E- <b>LSVVSSDEAK</b> -----KT <b>SSSSSAVNS</b>           |
| Tilapia Kank1b      | -----I <b>NP<b>THR</b>ISS</b> -----E- <b>LSVVSSDEAK</b> -----KT <b>SSSSSAVNS</b>           |
| Fugu Kank1b         | -----I <b>NP<b>THR</b>ISS</b> -----E- <b>LSVVSSDEAK</b> -----KT <b>SSSSSAVNS</b>           |
| Cavefish Kank1b     | -----S <b>RVDPSQWAS</b> -----S- <b>ESLSSVSSDEAR</b> -----N <b>PSVTTTSSISSINR</b>           |
| Spotted gar Kank4   | -----S <b>LPD<b>HG</b>SRS</b> -----A- <b>PKDSWNTPGSY</b> -----                             |
| Coelacanth KANK4    | -----S <b>IPNNGSRS</b> -----Y- <b>SSFSSGNWTSSY</b> -----                                   |
| Frog Kank1          | -----P <b>SQ<b>EAG</b>WPS</b> -----T- <b>DSLSSSNSDDNK</b> -----H <b>SPSL</b>               |
| Shark Kank1         | -----G <b>GQVSGWTS</b> -----T- <b>ESLSSSNSDENK</b> -----L <b>SPSLF</b>                     |
| Coelacanth KANK1    | -----A <b>GQFSGWTS</b> -----T- <b>ESLSSSNSDENK</b> -----L <b>SPSFLTK</b>                   |
| Mouse KANK1         | -----P <b>GHQGVWTS</b> -----T- <b>ESLSSSNSDDSK</b> -----Q <b>CP<b>S</b>FLLA</b>            |
| Rat KANK1           | -----P <b>GPQGVWTS</b> -----T- <b>ESLSSSNSDDSK</b> -----Q <b>CP<b>S</b>FLLA</b>            |
| Dog KANK1           | -----T <b>GQQGVWTS</b> -----T- <b>ESLSSSNSDDNK</b> -----Q <b>CP<b>H</b>FLLA</b>            |
| Human KANK1         | -----S <b>GQQGIWTS</b> -----T- <b>ESLSSSNSDDNK</b> -----Q <b>CP<b>N</b>FLLA</b>            |
| Anole lizard KANK1  | -----P <b>SQYSGWTS</b> -----N- <b>ESLSSSNSDDNK</b> -----H <b>SSSFCAARS</b>                 |
| Eagle KANK1         | -----G <b>GQCGGWTS</b> -----T- <b>ESLSSSNSDENK</b> -----Q <b>SCLAA</b>                     |
| Chicken KANK1       | -----G <b>GHCGDWTS</b> -----T- <b>ESLSSSNSDENK</b> -----Q <b>SFLAA</b>                     |
| Goose KANK1         | -----G <b>GHCSGWTS</b> -----T- <b>ESLSSSNSDENK</b> -----Q <b>SFLAA</b>                     |
| Turtle KANK1        | -----S <b>GQYSGWTS</b> -----T- <b>ESLSSSNSDENK</b> -----Q <b>SFFAA</b>                     |
| Aligator KANK1      | -----S <b>VQYSGWTS</b> -----T- <b>ESLSSSNSDENK</b> -----Q <b>SFLAA</b>                     |
| Spotted gar Kank1   | -----G <b>GQTSGWTS</b> -----T- <b>ESLSSSNSDECK</b> -----Q <b>SPLLP</b>                     |
| Herring Kank1       | -----N <b>NNNSVSSSSGGGCGLAEWTS</b> -----T- <b>DSLSSSNSDENK</b> -----Q <b>SQSPVFLNPGYLP</b> |
| Zebrafish Kank1a    | -----C <b>SGHTEWTS</b> -----T- <b>DSLSSSNSDECK</b> -----Q <b>SPVYF</b>                     |
| Cave fish Kank1a    | -----S <b>GQQA<b>E</b>WTS</b> -----T- <b>DSLSSSNSDESK</b> -----Q <b>SPVYF</b>              |
| Stickleback Kank1a  | -----G <b>GAPAEWTS</b> -----T- <b>DSLSSSNSDDKQ</b> -----                                   |
| Medaka Kank1a       | -----A <b>QA<b>E</b>WTS</b> -----T- <b>DSLSSSNSDDKQ</b> -----                              |
| Fugu Kank1a         | -----                                                                                      |
| Tetradon Kank1a     | -----                                                                                      |
| Tilapia Kank1a      | -----                                                                                      |
| Amazon molly Kank1a | -----T <b>AGGGARPEWTS</b> -----T- <b>DSLSSSNSDGKQ</b> -----S <b>PVFFTS</b>                 |
| Mouse KANK3         | -----W <b>T<b>S</b></b> -----S- <b>ESLASDDGGASG</b> -----                                  |
| Rat KANK3           | -----W <b>T<b>S</b></b> -----S- <b>ESLASDDGGASG</b> -----                                  |
| Dog KANK3           | -----P <b>GA</b> -----W <b>T<b>S</b></b> -----S- <b>ESLASDDGGASG</b> -----                 |
| Human KANK3         | -----P <b>GAWTSS</b> -----S- <b>ESLASDDGGAPG</b> -----                                     |
| Lamprey             | -----G <b>VNTAGVGA</b> -----A- <b>IRLSRREAAVGS</b> -----                                   |
| Coelacanth KANK3    | -----N <b>SHTS<b>G</b>WTS</b> -----T- <b>ESLSSTTSEDSK</b> -----N <b>MPIFF</b>              |

```

Frog Kank3          -----SCQTGGWTS-----T-ESLTFSDDDRSS-----NVFF
Turtle KANK3       -----SGHASGWTS-----T-ESLASTASEDGR-----NVL LLS
Alligator KANK3    -----GSHASGWTS-----T-ESLASTASEDGR-----TTL LLS
Eagle KANK3        -----SSHASAWTS-----T-ESLASTASEEGR-----
Chicken KANK3      -----SSHPSGWTS-----T-ESLASTLEDGR-----SAV
Goose KANK3        -----QPLGTL LVDGGR-----
Spotted gar Kank3  -----PGAGGHTSGWTS-----T-ESLSSSASEEGR-----VPP
Zebrafish Kank3    -----STGGRTSGWTS-----T-ESLSSSTSENGQ-----T
Cavefish Kank3     -----GGRASGWTS-----T-ESLASTTSEDGR-----SAPPVAR
Herring Kank3      -----GGRASGWTS-----T-ESLSSASDDGS-----RVPP
Stickleback Kank3  -----GGRASGWTS-----T-ESLSPASEDGS-----
Fugu Kank3         -----GGRTSGWTS-----T-ESLSSPASEDGR-----
Tetradon Kank3     -----GGRTSGWTS-----T-ESLSSPASEDGR-----
Medaka Kank3       -----GGRTSGWTS-----T-ESLSPASEDGR-----APP
Tilapia Kank3      -----GGRTSGWTS-----T-ESLSSPASEDGR-----
Amazon molly Kank3 -----GGRTSGWTS-----T-ESLSSPASEDGR-----VPP
Platyfish Kank3    -----GGRTSGWTS-----T-ESLSSPASEDGR-----VPP

```

310 320 330 340 350 360 370 380 390 400

```

Hydra
Trichoplax
Aplasia           EPMPYSPVHGG RPPVDETPP-FSASGR
Snail             DSDEPVTFFSSSSYRAAY SNDGAMTPPL
Fruitfly         TPCYRPRSSSVPRFTYGSIPRSESPFG
Hookworm         ---MSPKPEEEKKMF SKQLTTVGWVTG
C.elegance       --MSDFDDV LAPHKEVEKKKTVQDIRSR
Tunicate         -----ASEGTCEG-----
Spider           NSESLKDAVTD FEDT WQRSLKSSSSYA
Lingula          SVD TTLHTIDKVIKQTSYRTYSAGDSDF
Lancelet         --MGVQTPASLLSSGSSSRGSGASTPQPPAVSSAMLOGTREQIAASLKR IKVLEEQVKEIPVLQVKISVLKEEK RLLVMQLKSKNGEQNLKPEDTDNKRE
Medaka Kank4b    --SPPSDTHHHGYS LWASHRPPLPFTD
Amazon molly Kank4b --SRPLDNHHHGCS SSWTFDHRPPLSPTG
Platyfish Kank4b --SRPFANHHHGCS SSWTFDHRSLLYPTG
Stickleback Kank4b -----
Fugu Kank4b     -----SPHGYASWSNGHRSHLSPTG-----
Tetraon Kank4b -----
Cave fish Kank4b ---PRLADLQOSYGN TAFQSSDGGSTAL
Medaka Kank4a    ---PKSRVTEVQQIFDFRGGEGGTSSC
Fugu Kank4a     ---PKSRVAEVQQIFDFRASE-----
Tetradon Kank4a ---PKSRVAEVQQIFDFRASERTTSTQ
Stickleback Kank4a ---PKSRVTEVQQIYDFRASEGGTSSH
Tilapia Kank4a  ---PKSRVTEVQQIFDFRANEGVTSSL
Platyfish Kank4a ---PKSRVTEVQQIFDFRPEGAISSH
Amazon Molly Kank4a ---PKSRVTEVQQIFDFRPEGAISSH
Herring Kank4   ---RPKSRVTEVQQIFDFKPSDGGSPSL
Zebradish Kank4 ---PKSRVTEVQQLFEFRASDATGSSS
Cave fish Kank4a ---PKSRVTEVQQLFEFRASDSSSSG
Mouse KANK4     ---PRKISLGTQEPSQPLPLGDLPOA
Rat KANK4      ---PRKISLGTQEQSQSVPLGDLPOA
Dog KANK4      ---PRKVLGTEERAQSLPPGEYPQA
Human KANK4    ---PREASLGTQEQNQSPPLGNAPQA
Eagle KANK4    SFPQRKASLGAETPRPLPPDEAPLPVA
Chicken KANK4  --YRAQRKASLGAEEISRAPLPSEEPSY
Goose KANK4    ---LLPGQPPAGDGCEL
Anole lizard KANK4 ---DESTHLITPTDSTPFSGISNEP
Turtle KANK4   --SFAQRKASLGAETTCLITSYDSPQS

```

|                     |                                    |
|---------------------|------------------------------------|
| Aligator KANK4      | HRKTSLGAEEITIRLVTTNESPPFVTPTD----- |
| Frog Kank2          | -----HSSYSYCGRGFYPAYE-----         |
| Mouse KANK2         | -----HSAYSYCGRGFYPOYG-----         |
| Rat KANK2           | -----HSAYSYCGRGFYPOYG-----         |
| Dog KANK2           | -----HSAYSYCGRGFYPOYG-----         |
| Human KANK2         | -----HSAYSYCGRGFYPOYG-----         |
| Aligator KANK2      | -----LSYGP-----                    |
| Spotted gar Kank2   | -----                              |
| Cave fish Kank2     | -----HSSYSYCAPGYHTAQR-----         |
| Herring Kank2       | -----HSSFSYCAPGYHHPHH-----         |
| Zebrafish Kank2     | -----HSSYSYCAPGFHTSQR-----         |
| Tetradon Kank2      | -----HSSYSYCAPGYHTAQR-----         |
| Fugu Kank2          | -----HSSYSYCAPGYHSTQR-----         |
| Medaka Kank2        | -----HSSYSYCAPGYHTSQR-----         |
| Sticklebacc Kank2   | -----HSSFSYCAPGYHTTHR-----         |
| Tilapia Kank2       | -----HSSYSYCAPGYHTSQR-----         |
| Amazon molly Kank2  | -----HSSYSYCAPGYHTSQR-----         |
| Platyfish Kank2     | -----HSSYSYCAPGYHTLQR-----         |
| Coelacanth KANK2    | -----YSSFSYCGRGFYPAYG-----         |
| Anole lizard KANK2  | -----HSSYSYCGRSFYPOYP-----         |
| Turtle KANK2        | -----HSSYSYCAPGFYPOCG-----         |
| Tetradon Kank1b     | -----SPFTGLGAYNQDS-----            |
| Medaka Kank1b       | RGRPPLPPSHISSQDSKIFNSEDPSPSR       |
| Amazon molly Kank1b | GRPPLPPPSSLLDDRRSKGEGPGNSQR        |
| Platyfish Kank1b    | GRPPLPPPSSLLDDRRSKGGGPGNSQR        |
| Frog Kank4          | -----FKSDAQGNIAPAS-----            |
| Zebrafish Kank1b    | RRPPLPHSKPKTSSQRADVPODLITCQR       |
| Tilapia Kank1b      | RRPPLPHSKPKTSSQRADVPODLITCQR       |
| Fugu Kank1b         | RRPPLPHSKPKTSSQRADVPODLITCQR       |
| Cavefish Kank1b     | RRPPLPPSHSLPKTTSATLESSQAPPAS       |
| Spotted gar Kank4   | -LPKNKSRALDVQQIFDFRAAESMTPE-       |
| Coelacanth KANK4    | -LPAPKNKVVKT KDVLDFAAADSTTLAG-     |
| Frog Kank1          | LTRRHTFSENTARPSSEASPSFLTPEN        |
| Shark Kank1         | IGARSQPAPPPIRGGGIEASQAFITVQEN      |
| Coelacanth KANK1    | SQPVPPSAHVKTFASFEASPTFLTPVDS       |
| Mouse KANK1         | RSHTVTSTPIPRPPAPLETSPTEFAVSENR     |
| Rat KANK1           | RSHTVTSTPIPRPPAPLETSPTEFAISENR     |
| Dog KANK1           | RSQVTSTPVPRPPAPLETSPTEFLTIPES      |
| Human KANK1         | RSQVTSTPIPKPPPPLETSLPFLTIPEN       |
| Anole lizard KANK1  | PAAAATSFSTRPSLSFEASPSFLTIPES       |
| Eagle KANK1         | RSQVTSSIAVRPSVTFEASPSYLTVPES       |
| Chicken KANK1       | RSQVVSSAAVRPLASLEASPSYLTVPES       |
| Goose KANK1         | RSQVTSSVAVRPLVSVFEVSPSYLTVPES      |
| Turtle KANK1        | RNQVASSVTARPSVSVFEASPTFLTIPES      |
| Aligator KANK1      | RSQVVSSATARPSVSVFEASPAFLTIPES      |
| Spotted gar Kank1   | TRNQPNSPQVRTAVLHEASPAFLSVPEG       |
| Herring Kank1       | SLPPPPQPLTQSQTIRPREVPIPANVPH       |
| Zebrafish Kank1a    | TSQNQVAPPGHATAQVHEVPQPFVNVPET      |
| Cave fish Kank1a    | TTRSQLASLSHIGQVHEPPQAFVNVLEA       |
| Stickleback Kank1a  | -SPVFFGGGPQVAAPLTPTLCRACEAP-       |
| Medaka Kank1a       | -SPIPPFRPQDAAPLTCCEAPVQQLPSG-      |
| Fugu Kank1a         | -----                              |
| Tetradon Kank1a     | -----                              |
| Tilapia Kank1a      | -----                              |
| Amazon molly Kank1a | RHPDAAPLTPTLPRATGDVPLGQSYLAE-----  |
| Mouse KANK3         | -----ALSPGAFPGLSLPL-----           |
| Rat KANK3           | -----ALSPGAFPGLSLPL-----           |

```

Dog KANK3          -----ALSPGAPSGLLLSPR-----
Human KANK3       -----ILSQGAPSGLLMQPL-----
Lamprey           -----VDFSENFVGAEV-----
Coelacanth KANK3 PRGRTQSSSLEVRFPFGVQTSNVPSPAP-----
Frog Kank3        PRVRTQSNSSDNKEMLSFPKSNPVSPTP-----
Turtle KANK3     PRIRTSQSGSSEMREPLSKQASNPVSPTP-----
Aligator KANK3   PHARTQSNSSSETREALSKQVSNPVSPTA-----
Eagle KANK3      TLLLLSPRGRAPLEPLSKPSSHVSPPPP-----
Chicken KANK3    LLSPHGRAVPEPPGKQTSLPTSPPPFVR-----
Goose KANK3      -----
Spotted gar Kank3 VPPFRNRRTISAPSESLPLSPVPLTSPPL-----
Zebrafish Kank3  NQPFLLQSPITPPYKSQPLSPLPVISPSL-----
Cavefish Kank3   SHLISPSPKSQPLSPTSVCSPTLPSASK-----
Herring Kank3    PPPFRNRRLGSAPAEVHIRSPVSVLSPPL-----
Stickleback Kank3 -----LGSAPCEGLRLSPVTLTGVP-----
Fugu Kank3       --GPPPPPPRNRRLGSAPCEGLGLSPMA-----
Tetradon Kank3   ----APPPPPRNRRLGSAPCAKVPPPP-----
Medaka Kank3     PPPFRNRRLGSAPCEVLSLSPVTLASFPS-----
Tilapia Kank3    ----ATVLSLSPVTFNLVPPPLSAGAKV-----
Amazon molly Kank3 PPPFRRLRLGSAPCEVLSISPVTLLNVPP-----
Platyfish Kank3  PPPFRRLRLGSAPCEVLSISPVTLLNVPP-----

```

410 420 430 440 450 460 470 480 490 500

```

Hydra             -----FSCQNDLISSKNQELQTDDEVILK-----
Trichoplax
Aplasia          -----TDSLSSLSVSTVSSSEAPMMHQAYLYQQQQAQHF-----
Snail            -----SSMARTDLSLTSLSVSTMSSESHLMQQLYPQEF-----
Fruitfly        -----TASSTCSSLRGGVESDAGIYHQRHRPAISPPETRAFLHEALDEVCSDFERTLERTSVKRR-----
Hookworm        -----PLPPAKPCAECAPLRREVQELLKRLAVAEA-----
C.elegance       -----MQGGYNSDYTTYRRGPPEIPRAHFEOAKPPPL-----
Tunicate        -----NRQGVRAADKTLMETRRRLEAFRSFRS-----
Spider          -----VSDKRNQFKVVKDLATSETSAIMCGSMENKELYAT-----
Lingula         -----SPSPTSPTKFTSTMYTTNRALAGSNSSIS-----
Lancelet        KQDGDKDGTKRLHRRSLSTGSFQMLEQQWKEQQAEQEKQKASKDAPAPSEKTVQPRSANGATNTYKERILAKPRFVNQTPQIEDGPPNIKMEENDRQ
Medaka Kank4b   -----PRSLAELEAKIKEFDEQPLGEH-----
Amazon molly Kank4b -----LTSLTEMEARIKEFDEQPLGEH-----
Platyfish Kank4b -----LTSLTEMEARIKEFDEQPLGE-----
Stickleback Kank4b -----LRTLSEMEARIREFDEQPLGEH-----
Fugu Kank4b     -----
Tetraon Kank4b -----
Cave fish Kank4b -----VRQVEPSYSSTAAEMDATIOAFDEQPLGLH-----
Medaka Kank4a   -----RGQTSQGIQFVPGKPREEIGAGTQGEDNAVSQS-----
Fugu Kank4a     -----SVTSTQSNRAAVSPAKPRDEAREGDG-----
Tetradon Kank4a -----SNRAAVSPGGGFSLAKPRDEAQEGEVKTI-----
Stickleback Kank4a -----IRAGHVSAKPRDELGAGAKDVEERTSGI-----
Tilapia Kank4a  -----SSRVTTSGQTSYVSTKPKDEVGAGARGVEDKTGGIQ-----
Platyfish Kank4a -----SSRATTSQGTANVSTKSRDEPGTVYQGTEDKTAVI-----
Amazon Molly Kank4a -----SSRATTSQGTPNVSNKSRDEPGTVYQGTEDKTAVI-----
Herring Kank4   -----SRIQGTSYSPPPRPAEEVKSRVYEEQPLSLQ-----
Zebradish Kank4 -----SISGSSATSQSKI SSSYLSPKVAEESQVQTS-----
Cave fish Kank4a -----SGISTAGHSKVQNTGYLSSSKPADEPLVQA-----
Mouse KANK4     -----SVQGSSELNYHRKALLAKDARQAEAGSLEDV-----
Rat KANK4       -----TVHGNELSYHRKALLAKDTRQVEAGSLEDA-----
Dog KANK4       -----SASGSEVSYHRKALLAETARHLEAAAPREA-----
Human KANK4     -----STSRSEVSYHRKALLAETARQLEAAEPEDA-----
Eagle KANK4     -----DEPSYRCALSAAETRRPSEPGQEGE-----

```

Chicken KANK4 -----RRKALLAETRRAELVRCED-----  
 Goose KANK4 -----CPLRSPSQPGDNESCPES-----  
 Anole lizard KANK4 -----NYRRKALLIETTRQDPMKLAEN-----  
 Turtle KANK4 -----LTAEEPSYRKALLAETIRQAEVIHHEE-----  
 Aligator KANK4 -----EQSYRKALLAETIRQAEVMHPEED-----  
 Frog Kank2 -----SRGGAQAPHNFNPRVEKTLLDASKKLEAGQSRPL-----  
 Mouse KANK2 -----ALETRIGSNPRVERTLLDARRRLEDQAAAPS-----  
 Rat KANK2 -----ALETRSGTNPRVERTLLDARRRLEDQAAAPS-----  
 Dog KANK2 -----ALETRAGFNPRVERTLLDARRRLEDQAAAPT-----  
 Human KANK2 -----ALETRGGFNPRVERTLLDARRRLEDQAAATPT-----  
 Aligator KANK2 -----RDARVESTLLGARRKLEGOA-----  
 Spotted gar Kank2 -----NARVERTLLDARKKLEEDQKDR-----  
 Cave fish Kank2 -----PGFGAGRVEKTLLDARRKLEEEKDARR-----  
 Herring Kank2 -----ASSAAATMQRPSFSAARVERTLLDARRKLEEEKES-----  
 Zebrafish Kank2 -----PNFSTARVEKTLMDARRKLEEEKDGR-----  
 Tetradon Kank2 -----PSFTTARVEKTLLDARRKLEEEKEGRR-----  
 Fugu Kank2 -----PSFSTARVEKTLLDARRKLEEEKEGRR-----  
 Medaka Kank2 -----PSFTAARVEKTLLDARRKLEEEKEGRR-----  
 Stickleback Kank2 -----PSFSSARVEKTLLDARRKLEEEKESRR-----  
 Tilapia Kank2 -----PSFSTARVEKTLLDARRKLEEEKEGRR-----  
 Amazon molly Kank2 -----PSFSTARVEKTLLDARRKLEEEKEGRR-----  
 Platyfish Kank2 -----PSFSTARVEKTLLDARRKLEEEKEGRR-----  
 Coelacanth KANK2 -----VENRPPLLTSGYNARVEKTLLDARRRLEEDQADSA-----  
 Anole lizard KANK2 -----NTTPGSEFNARVEKTLLDARKKLEDQADSGD-----  
 Turtle KANK2 -----TGAFNARVEKTLLDARKKLEDQAGDRA-----  
 Tetradon Kank1b -----KRCSDAGTEKH-----  
 Medaka Kank1b -----IPSGSKPQSAPRSSQSGVMEKTEETSKLLNQDVVGQT-----  
 Amazon molly Kank1b -----HTEPKPQOTERNAASQRPSLQVQSVLETHKHISQSPQPL-----  
 Platyfish Kank1b -----HAEPKPQOTERNAASQIPSPGVEQTVLETHKNISQSPQPL-----  
 Frog Kank4 -----DSSLRLRYIHDLNRYRKENVCDTQKHIGDIVSEDI-----  
 Zebrafish Kank1b -----NVEGKPTPTTQPTTAKSNPVVEKTLMETCRRLEHEKGSLO-----  
 Tilapia Kank1b -----NVEGKPTPTTQPTTAKSNPVVEKTLMETCRRLEHEKGSLO-----  
 Fugu Kank1b -----NVEGKPTPTTQPTTAKSNPVVEKTLMETCRRLEHEKGSLO-----  
 Cavefish Kank1b -----HRPSDGKPPPVACQPTSPTKPNPLVERTLVETRRRLEQENVLSQ-----  
 Spotted gar Kank4 -----PRALGFSFSSVKAFFDEQPLGFR-----  
 Coelacanth KANK4 -----SSNTCELNFKVGSYQEIKGEGKEACYGEP-----  
 Frog Kank1 -----KPLPPSPQIPQHNHVTKTLMETRRRLEQEKIMQ-----  
 Shark Kank1 -----KLLPPSPRPPIHNFHVEKTLMETRRRLEQERLIMQ-----  
 Coelacanth KANK1 -----KLLPPSPRLPKHNFHVTKTLMETRRRLEQERLIMQ-----  
 Mouse KANK1 -----QLLPPSPQLPRHNLHVTKTLMETRRRLEQERVIMQ-----  
 Rat KANK1 -----QLLPPSPQLPRHNLHVTKTLMETRRRLEQERVIMQ-----  
 Dog KANK1 -----RQLPPSPQLPKHNLHVTKTLMETRRRLEQERVIMQ-----  
 Human KANK1 -----RQLPPSPQLPKHNLHVTKTLMETRRRLEQERATMQ-----  
 Anole lizard KANK1 -----KQLFPPSPQLPRHNLHVTKTLMETRRRLEQEKMMQ-----  
 Eagle KANK1 -----KQLPPSPQPPRHNHVTKTLMETRRRLEQERMMQV-----  
 Chicken KANK1 -----KQLPPSPQLPRHNLHVTKTLMETRRRLEQERMMQV-----  
 Goose KANK1 -----KQLPPSPQLPRHNLHVTKTLMETRRRLEQERMMQV-----  
 Turtle KANK1 -----RQLPPSPQLPRHNLHVTKTLMETRRRLEQEKVIMQ-----  
 Aligator KANK1 -----KQLPPSPQLPRHNFHVTKTLMETRRRLEQERIMMQ-----  
 Spotted gar Kank1 -----KLLPPSPRLPRHNLHVEKTLMETRRRLEQERLLMQ-----  
 Herring Kank1 -----EAPQVYLSVLEAKQOQHLPSPSRVPRHNPQVEKTLMETRRRLEQERLLAQ-----  
 Zebrafish Kank1a -----KQLLPPSPHLLRHNQVEKTLMETRRRLEQERLLMQ-----  
 Cave fish Kank1a -----KQQQQQLLPPSPRLPRHNPQVEKTLMETRRRLEQERLLMQ-----  
 Stickleback Kank1a -----QRLLLLPPSPRFAPRHNQVEKTLMETRRRLEQERLLTQ-----  
 Medaka Kank1a -----ATEQRLLPPSPRFAPRHNQVEKTLMETRRRLEQERLLLQ-----  
 Fugu Kank1a -----METRLRLEQERLLMQ-----  
 Tetradon Kank1a -----METRLRLEQERLLMQ-----



```
Tilapia Kank1a -----METRRRLEQERALLQ-----
Amazon molly Kank1a -----QKQLLPPPSPRFAPRHNPQVEKTLMETRRRLEQERLLVQ-----
Mouse KANK3 -----SFRSLSRNPVEHTLLETSSRRLEQAQARER-----
Rat KANK3 -----SERSFSRNPRVEHTLLETSSRRLEQAQOER-----
Dog KANK3 -----VPARNPRVEHTLLETSSRRLELAQAHER-----
Human KANK3 -----SERAPVRNPVEHTLLETSSRRLELAQATHER-----
Lamprey -----RSVSCDTEELENE-----
Coelacanth KANK3 -----TVRLPPPSFKSLVRNPVEKTLLETSSRRLEEEQLSLE-----
Frog Kank3 -----VISLLPPPSFKSLLRNHRVEKTLLETSSKRLEQEQLNLQ-----
Turtle KANK3 -----VINLLPPPAKSLMRNPVEKTLQETSRRLELEQLHLL-----
Aligator KANK3 -----VINLLPPPSFKSLLRNPRVEKTLLETSSRRLEQEQLNLL-----
Eagle KANK3 -----PVRLLPPPTRKCLMRNPVEKTLLETSSRRLEQEQGHLO-----
Chicken KANK3 -----LLPPPARKYLARNPQVEKTLLETSSRRLEQEQRSO-----
Goose KANK3 -----
Spotted gar Kank3 -----SAGPRGPPPPPIRNPVERTLLETSSRRLEQEQSHLO-----
Zebrafish Kank3 -----PTFSKVPPPPPRNPVERTLLETSSLRLQQEQSQFS-----
Cavefish Kank3 -----IPPPPPRNPVERTLLETSSRRLQQEQSQFFP-----
Herring Kank3 -----SAGAKVPPPPPARNPVERTLLETSSLRLQQEQSQLQ-----
Stickleback Kank3 -----LSAGAKVPPPPQORNPRVERTLLETSSRRLQHEQTHQH-----
Fugu Kank3 -----LRNPRVERTLLETSSRRLQQEQTHQH-----
Tetradon Kank3 -----PORNPRVERTLLETSSRRLQQEQTHQH-----
Medaka Kank3 -----ISAKVPPPPQORNPRVERTLLETSSRRLQQEQTHQH-----
Tilapia Kank3 -----PPPPQORNPRVERTLLETSSRRLQQEQTHQN-----
Amazon molly Kank3 -----LSAGAKVPPPPQORNPRVERTLLETSSRRLQQEQTHQH-----
Platyfish Kank3 -----LSAGAKVPPPPQORNPRVERTLLETSSRRLQQEQTHQH-----
```

510 520 530 540 550 560 570 580 590 600

```
Hydra -----ESSVGDVAEK-----
Trichoplax -----
Aplasia -----QHSKTTKTSTEVIE-----
Snail -----QYTVNHKVTSKIIE-----
Fruitfly -----KSPYGAGSLSMDRNNKLSLSISNGHGALKELKSHRLGNSTWDRHFDVADSCIGGNQSPGTGTPRPFLLR-----
Hookworm -----KPTVVS-----
C.elegance -----SRPINLG-----
Tunicate -----KRTKAFGE-----
Spider -----TFPAVQSRSSS-----
Lingula -----S-----
Lancelet QANKDNI TRPTNLENTTSSANVVRTVEPQTNVEKPADAESGFGMESDTP EANKVDLSPDGKCTCCPYGYHIDLDFLKYCDDISKGSNIPKIVRPRKPK-----
Medaka Kank4b -----IRPHLLR-----
Amazon molly Kank4b -----IRPHLLR-----
Platyfish Kank4b -----HIRPHLLR-----
Stickleback Kank4b -----
Fugu Kank4b -----IRPNLLR-----
Tetraon Kank4b -----
Cave fish Kank4b -----VRPNLLR-----
Medaka Kank4a -----RPNLLR-----
Fugu Kank4a -----RTIPGQARPNNLLR-----
Tetradon Kank4a -----LGQTRPNLLR-----
Stickleback Kank4a -----QSRPNLLR-----
Tilapia Kank4a -----IQSRPNLLR-----
Platyfish Kank4a -----QSRPNLLR-----
Amazon Molly Kank4a -----QSRPNLLR-----
Herring Kank4 -----LRPNLLR-----
Zebradish Kank4 -----SQNEQSIGLSVRPHLLR-----
Cave fish Kank4a -----SYKEQQLSLNVRPHLFR-----
Mouse KANK4 -----GSGRPQLLR-----
```



|                     |                      |
|---------------------|----------------------|
| Rat KANK4           | -----GSGRPQLLR       |
| Dog KANK4           | -----ETASGSGRPQLLR   |
| Human KANK4         | -----ELTFGSGRPQLLR   |
| Eagle KANK4         | -----LRGRPQLLR       |
| Chicken KANK4       | -----LRGRPQLLR       |
| Goose KANK4         | -----TFRPALRS        |
| Anole lizard KANK4  | -----GSCRGPRQLLR     |
| Turtle KANK4        | -----PGSCRGPRQLLR    |
| Aligator KANK4      | -----LASCGRPRQLLR    |
| Frog Kank2          | -----                |
| Mouse KANK2         | -----                |
| Rat KANK2           | -----                |
| Dog KANK2           | -----                |
| Human KANK2         | -----                |
| Aligator KANK2      | -----                |
| Spotted gar Kank2   | -----RFSN            |
| Cave fish Kank2     | -----FSN             |
| Herring Kank2       | -----RRFSH           |
| Zebrafish Kank2     | -----FSN             |
| Tetradon Kank2      | -----YSN             |
| Fugu Kank2          | -----YSN             |
| Medaka Kank2        | -----FSN             |
| Stickleback Kank2   | -----FST             |
| Tilapia Kank2       | -----FSN             |
| Amazon molly Kank2  | -----FSN             |
| Platyfish Kank2     | -----FSN             |
| Coelacanth KANK2    | -----EDRRSRFAS       |
| Anole lizard KANK2  | -----GERSRVSG        |
| Turtle KANK2        | -----G               |
| Tetradon Kank1b     | -----                |
| Medaka Kank1b       | -----PPQPLPFRRLAS    |
| Amazon molly Kank1b | -----PFRRLAS         |
| Platyfish Kank1b    | -----PFRRLAS         |
| Frog Kank4          | -----NRCADRPQFVR     |
| Zebrafish Kank1b    | -----QAPPEPQFRRRLAS  |
| Tilapia Kank1b      | -----QAPPEPQFRRRLAS  |
| Fugu Kank1b         | -----QAPPEPQFRRRLAS  |
| Cavefish Kank1b     | -----AVPQELCFRRRLAS  |
| Spotted gar Kank4   | -----VRPQLLR         |
| Coelacanth KANK4    | -----SALSRRGPQLLR    |
| Frog Kank1          | -----VASSYNDIRRPRLAS |
| Shark Kank1         | -----STSGDARRPRFAS   |
| Coelacanth KANK1    | -----SGPGDVRRPRLAS   |
| Mouse KANK1         | -----MAPGDFRRPRLAS   |
| Rat KANK1           | -----MAPGEFRRPRLAS   |
| Dog KANK1           | -----VAPGEFRRPRLAS   |
| Human KANK1         | -----MTPGEFRRPRLAS   |
| Anole lizard KANK1  | -----ASPGDTRRPRLSS   |
| Eagle KANK1         | -----TPGDVRRPRLSS    |
| Chicken KANK1       | -----MPGDVRRPRLSS    |
| Goose KANK1         | -----TPGDVRRPRLSS    |
| Turtle KANK1        | -----VTPGDVRRPRLSS   |
| Aligator KANK1      | -----VTPGDVCRPRLSS   |
| Spotted gar Kank1   | -----PPSSEARRPRLAS   |
| Herring Kank1       | -----PPPCDPPFRRLAS   |
| Zebrafish Kank1a    | -----PPVSEPPFRRLAS   |
| Cave fish Kank1a    | -----PPASEPPFRRLAS   |

```

Stickleback Kank1a -----PPSLAS
Medaka Kank1a -----PHTEVLMFRRRLAS
Fugu Kank1a -----PHVDPMPRRRLAS
Tetradon Kank1a -----PHVDPPLFRRRLAS
Tilapia Kank1a -----PLSEPPMPRRRLAS
Amazon molly Kank1a -----AHNEPLIFRRRLAS
Mouse KANK3 -----
Rat KANK3 -----ALS PARAATRS
Dog KANK3 -----
Human KANK3 -----
Lamprey -----
Coelacanth KANK3 -----NIGDVQRPLAS
Frog Kank3 -----GAEGQIRTCSSSTLSK
Turtle KANK3 -----SSGDAQMTG
Aligator KANK3 -----SSGNAQIPK
Eagle KANK3 -----DIGGPSRSG
Chicken KANK3 -----
Goose KANK3 -----
Spotted gar Kank3 -----NGSGFQLAEPFRAGSKQ
Zebrafish Kank3 -----NGLGSNLAD
Cavefish Kank3 -----NGLGLPASDLRS
Herring Kank3 -----NGTGTIQLADPPRGALRE
Stickleback Kank3 -----
Fugu Kank3 -----QNGGRFQLAD
Tetradon Kank3 -----
Medaka Kank3 -----
Tilapia Kank3 -----
Amazon molly Kank3 -----
Platyfish Kank3 -----Q

```

610 620 630 640 650 660 670 680 690 700

```

Hydra FYSNSFTQ-----VLKNYKNQFTQCHLTEYLD-----
Trichoplax -----
Aplasia NPVLEMAT-----AEMKYATNPVEMGTAEMKPLPPPPPVK-----
Snail TPVLEMAT-----AEVKLKETPVIERGTAEVKPKETSVE-----
Fruitfly SNTLPLRQ-----RSPPAEVQYESYVQATVAANAKSPVEQLESAKSPGAPPPPPRRHLLAT-----
Hookworm IGTATEEV-----ORVEAAVGEPTQC-----
C.elegance FSGRSNT-----PTQRFNAPNGTGNGYSTALAKT-----
Tunicate EGPLPPHN-----YAVRNGVSSQTLHNMRRGSGS-----
Spider MSSVSSQS-----TASILGPVPDASRNSCMSD-----
Lingula QTTVNSEM-----SAVNGSPGPERYTTVTAQ-----
Lancelet SPGGPAPMDFRANTLPRGFYLNQQSNLPKHASVVPSSPISPLSVNTSLSSANN SIPETTTTTATTTKQTVTDPRENASSVYGYNSSTRRPSLPGDLPIP-----
Medaka Kank4b ASSLPLTV-----LLRQSESECADDRSSIWSSREY-----
Amazon molly Kank4b ASSLPLTV-----LLRQSESESTDDRSSVRSRD-----
Platyfish Kank4b ASSLPLTV-----LLRQSESESTDDRSSIQSSRD-----
Stickleback Kank4b -----
Fugu Kank4b ASSLPLTV-----LLRQSSESSDDPSSLRGSRDHLEG-----
Tetraon Kank4b -----
Cave fish Kank4b ASSLPLTV-----LLRKRSESIEDPTSPNGSRDYLTQ-----
Medaka Kank4a ASSMPITL-----QQRKGS DSSSPDCTTGTP-----
Fugu Kank4a ASSMPITL-----QQRKGS DSSSPDRTVGTPE-----
Tetradon Kank4a ASSMPITL-----QQRKGS DSSSPDRTVGTPE-----
Stickleback Kank4a ASSMPITL-----QQRKAS DSSSPDRVVGTPE-----
Tilapia Kank4a ASSMPITL-----QQRKSS DSSSPDRTVGTPE-----
Platyfish Kank4a ASSMPITL-----QQRKGS DSSSPDCTTGTP-----
Amazon Molly Kank4a ASSMPITL-----QQRKGS DSSSPDCTTGTP-----

```

|                     |          |       |       |                             |             |
|---------------------|----------|-------|-------|-----------------------------|-------------|
| Herring Kank4       | TSSMPGNV | ----- | ----- | PRRKGSDSSEDRSPVALGESQ       | -----       |
| Zebradish Kank4     | ASSMPVNV | ----- | ----- | PRRKGSDSTDEQSSQ             | -----       |
| Cave fish Kank4a    | ASSMPVNV | ----- | ----- | PQRRLSDSTDEQSPQ             | -----       |
| Mouse KANK4         | ASSMPATL | ----- | ----- | LQNQVPEEPLTSGPST            | -----       |
| Rat KANK4           | ASSMPATL | ----- | ----- | PQNQAPEVNLTSGPSA            | -----       |
| Dog KANK4           | ASSMPATL | ----- | ----- | LQNKASEDSSLNSGSPM           | -----       |
| Human KANK4         | ASSMPATL | ----- | ----- | LHSRASEEPGLSLGPPA           | -----       |
| Eagle KANK4         | ASSMPAAL | ----- | ----- | PPGQPPPPPGDKVPSPLRPPPHCHD   | -----       |
| Chicken KANK4       | ASSLPAAL | ----- | ----- | PPGQAPASDGCVPCLRPS          | -----       |
| Goose KANK4         | PDGITSSL | ----- | ----- | PQDAF                       | -----       |
| Anole lizard KANK4  | ASSMPATL | ----- | ----- | PPNQNSEEEETPLTFLQS          | -----       |
| Turtle KANK4        | ASSMPAKL | ----- | ----- | LPSKSSSEESQCSKPSQPSALSQPC   | -----       |
| Aligator KANK4      | ASSMPATL | ----- | ----- | PPTKNAEEESQCSEPSQLVLLPQPC   | -----       |
| Frog Kank2          | --SLGCRS | ----- | ----- | TSSLSTQSLSRFP               | -----       |
| Mouse KANK2         | SGGLGSLT | ----- | ----- | PSAAGSTS                    | -----       |
| Rat KANK2           | SGGLGSLT | ----- | ----- | PSAAGSTS                    | -----       |
| Dog KANK2           | --GLGSLT | ----- | ----- | PSAAGSTS                    | -----       |
| Human KANK2         | --GLGSLT | ----- | ----- | PSAAGSTA                    | -----       |
| Aligator KANK2      |          | ----- | ----- |                             | -----       |
| Spotted gar Kank2   | LGSLHSSI | ----- | ----- | AGSTSSLASQYSRAQNG           | -----       |
| Cave fish Kank2     | LGSMHGSM | ----- | ----- | AGSNTSLSSAHSFN              | -----       |
| Herring Kank2       | LGSMHSSV | ----- | ----- | AGSTTSLSSAHSYNRSHGGGGGG     | -----       |
| Zebrafish Kank2     | LGSMHSSM | ----- | ----- | AGSNTSLSSAHS                | -----       |
| Tetradon Kank2      | LGSMNSSV | ----- | ----- | AGSNTSLSSAHSF               | -----       |
| Fugu Kank2          | LGSMNSSV | ----- | ----- | AGSNTSLSSAHSF               | -----       |
| Medaka Kank2        | LGSMHSSV | ----- | ----- | AGSNTSISSAHSF               | -----       |
| Sticklebake Kank2   | LGSMHSSV | ----- | ----- | AGSNTSLSSAHSF               | -----       |
| Tilapia Kank2       | LGSMHSSV | ----- | ----- | AGSNTSISSAHSF               | -----       |
| Amazon molly Kank2  | LSSMNNSM | ----- | ----- | AGSNTSLSSAHSF               | -----       |
| Platyfish Kank2     | LGSMNNSM | ----- | ----- | AGSNTSLSSAHSF               | -----       |
| Coelacanth KANK2    | LGSLHGSV | ----- | ----- | SGSTSSLSGAGLSQSLSKMSSHS     | -----       |
| Anole lizard KANK2  | LGSLHSSV | ----- | ----- | SGSTSSLVGSQSLSRQTSYN        | -----       |
| Turtle KANK2        | PGGLGSLH | ----- | ----- | SSVSGSTSSLVGGQPP            | -----       |
| Tetradon Kank1b     | -AGLSSSL | ----- | ----- |                             | -----       |
| Medaka Kank1b       | FGGVSSPG | ----- | ----- | SVSPFTGLNAYNQSNNNHSSDADVHLG | -----       |
| Amazon molly Kank1b | FGGISPSC | ----- | ----- | SHSPFTGMGAYNQNNNGNKPDDDMSAH | -----       |
| Platyfish Kank1b    | FGGISPSC | ----- | ----- | SHSPFTGLGAYNQNNNGNKPDDDMSAH | -----       |
| Frog Kank4          | ASSMPAAL | ----- | ----- | PQSTGHYEQNKY                | -----       |
| Zebrafish Kank1b    | FGGVGSSG | ----- | ----- | TLSPYTSWSALNQGAKMTVLDQPRER  | -----       |
| Tilapia Kank1b      | FGGVGSSG | ----- | ----- | TLSPYTSWSALNQGAKMTVLDQPRER  | -----       |
| Fugu Kank1b         | FGGVGSSG | ----- | ----- | TLSPYTSWSALNQGAKMTVLDQPRER  | -----       |
| Cavefish Kank1b     | FGGVSSG  | ----- | ----- | TLSPYTSWNALNQAQTQALSKRSGDQ  | -----       |
| Spotted gar Kank4   | TSSLPVTV | ----- | ----- | LQRKNSPEPEQAPPPIRSSNKPNGT   | -----       |
| Coelacanth KANK4    | ASSMPVTV | ----- | ----- | LQRKDSSEEQCTPTDVQHS         | -----       |
| Frog Kank1          | FGGMGSTG | ----- | ----- | SLSSVTGTTGHNISAQQLQ         | -----NGH    |
| Shark Kank1         | FGGMGSTS | ----- | ----- | SLSSFTGSTGLNQVSPNSQ         | -----QVHNGF |
| Coelacanth KANK1    | LGAMGSTS | ----- | ----- | SLSSFTGSSGHNHISPTSQQLQ      | -----NGY    |
| Mouse KANK1         | FGGMGSTS | ----- | ----- | SLPSFVGSANHSSAIHQQLQ        | -----NGY    |
| Rat KANK1           | FGGMGSTS | ----- | ----- | SLPSFMGSGNHSSAMHQQLQ        | -----NGY    |
| Dog KANK1           | FGGMGSTS | ----- | ----- | SLSSFLGSGNHNPAHQQLQ         | -----NGY    |
| Human KANK1         | FGGMGTTT | ----- | ----- | SLPSFVGSNGHNPAKHQQLQ        | -----NGY    |
| Anole lizard KANK1  | FGAMGSTG | ----- | ----- | SLPSFVGSSGPNQVSHPFQ         | -----NGY    |
| Eagle KANK1         | FGGMGSTS | ----- | ----- | SLPSFVGSSGYGHMSQQLQ         | -----NGY    |
| Chicken KANK1       | FGGMGSTS | ----- | ----- | SLPSFVGSSGYGHLPQQLH         | -----NGY    |
| Goose KANK1         | FGGMGSTS | ----- | ----- | SLPSFVGSSGYGHMSQQLQ         | -----NGY    |
| Turtle KANK1        | FGGLGSAS | ----- | ----- | SLPSFVGSSGHSQMSQQLQ         | -----NGY    |
| Aligator KANK1      | FGGLGSAS | ----- | ----- | SLPSFVGSSGHNQVSPQLQ         | -----NGC    |

```

Spotted gar Kank1  FGGMGSTS-----SLSSFTGSSGQNQISFNHSHQLVH-NGH
Herring Kank1     FGGMGSNS-----SLSSSYGGSVGPSQISPGSHLLVH-NGH
Zebrafish Kank1a  FGGMGSSS-----SLSSYGSYGPSQISFSSHSFQH-NGH
Cave fish Kank1a  FGGMGSSS-----SLSSYGGSYGPSQILPSSNSLQH-NGH
Stickleback Kank1a FGAAGSSS-----LSSHSGSAGPSQISFGAPHPLPVNGH
Medaka Kank1a     FGGVGSSS-----SLSSYGSYGPSQVSPSAHHPLPTNGH
Fugu Kank1a       FGGMGSSS-----SLSSHSSSILHSQISFNAHPAFPINGH
Tetradon Kank1a   FGGMGSSS-----SLSSYGSIVQSQISPSAHPAFTINGH
Tilapia Kank1a    FGGMGSSS-----SLSSYTGSIQTSQISFNQTYQLPINGH
Amazon molly Kank1a FGGMGSSS-----SLSSYSSSVATSQISFSTHQPLPING-
Mouse KANK3
Rat KANK3         PRGSGRSS-----
Dog KANK3
Human KANK3
Lamprey
Coelacanth KANK3 AGSRAGNL-----PLGTSSSNLNQLPSPIPQNGNGDSQNLH
Frog Kank3        LGSVSTSS-----PNLSQLPQNLPLNKVGEHSHGIL-
Turtle KANK3      PPSPPSKT-----WISVSTASFHQTRSSSAVPLNGGDSQ
Aligator KANK3    PPSPPSKT-----SNSISSAASVTQSRSCSSVPSNNGDSQ
Eagle KANK3       PPGAPSQP-----SPWVPAG-
Chicken KANK3     -PGAPSQA-----HPWVPAG-
Goose KANK3
Spotted gar Kank3 LGRVAINS-----SQSPPPSAFMGDPHPPHLPSPSP-
Zebrafish Kank3   LSKVSSKT-----NVSNRDFSVGSSQPSSEAPLLEPMSHYMQ
Cavefish Kank3    VGTTRDGGG-----SVGNLSASSPLPTDGHLLQISTTAATT
Herring Kank3     AGWTGSSS-----SQPATTAAVFPASAQSSNGGVKLNFF
Stickleback Kank3
Fugu Kank3        PPKQLLRS-----
Tetradon Kank3
Medaka Kank3      HNGGRLQL-----AEPKQLTPSPST-
Tilapia Kank3     -PM-----
Amazon molly Kank3 QNGGRLQL-----ADPPKQLTPSLSI-
Platyfish Kank3   NGGGRLQL-----ADPPKQLTPSLSI-

```

710 720 730 740 750 760 770 780 790 800

```

Hydra              KSLMAGCSTNDFIDVGSGLD-----SLA-----EIFLISSETQTCKQVK
Trichoplax        -VLIKKIQQEYN-----VTEKDDINDQSGLLIK
Aplasia           DESTROKYSTLLSAQLADNGVDLPDSARPPDRKP-----PAR-----ASPVDVNMQLQSVREAMAVSLQ
Snail             RGTAEVKHYSTTSSAQLAGPSEVFEVFPVFSKVF-----PGN-----TKIPPNTLPPASPLTFAVKETLALNAQ
Fruitfly         TPTGKPTFKEDRPQENGVSVSSSLQSPVISETCQ-----TTAD-----AQLFQIREQMALSLR
Hookworm          YSIATEETQRYETVDCGADA-----LQIEVASVCQTSPTTMA
C.elegance        ISEIRARNAESPFPDSRVG-----TPIDL-GLHQQNGHVT
Tunicate          PANSSGSLTPNTIASGNGQ-----IT-----SHHLQVVREQMATALS
Spider            QMTAAIATLSKPISSSTNT-----VGIH-----RSVLTNIRAQMASSLY
Lingula           LAAVLAALHLPDPDSGEAV-----PIY-----HQSLIELRQQLAISLQ
Lancelet          FTSPNSNSVFTMPAALATQSNSSSSSLSSQLSTQSSSGQFSPHSEMSGDTKHSMGVQTPASLLSPGSSSRGSGASTPQPPAVSSAMLQGIREQIAASLK
Medaka Kank4b     LLAGNTSCEDVFNPPDSPQ-----PQDCSGLLRRLSEALE
Amazon molly Kank4b HLGGRNTSCEDVFLSDSPR-----PQDCSGLLRRLTEALE
Platyfish Kank4b  HLGGRNTSCEDVFLSDSPR-----PQDCSGLLRRLTKALE
Stickleback Kank4b ISGGAEPGRTDGSAVSPEA-----
Fugu Kank4b       RNVSCEDVFHSPDSRQSHE-----GSVLLRRLRE---ALE
Tetraon Kank4b
Cave fish Kank4b  ENGSSEDFVHSPERKTAGA-----NGTLQRLTAAALQ
Medaka Kank4a     NGSTENMFRSPDITERRC-----IPQDRAGLHQQITVALK
Fugu Kank4a       TGSTENVFRASPDITERRS-----IPQDRTGLHQQITVALK
Tetradon Kank4a   SGSTENMFRASPDITERRC-----IPQDRTGLHQQITVALK

```

Stickleback Kank4a -----SGSTENVFRASPDITERRC-----IPQDRTGLHQITVALK  
Tilapia Kank4a -----NGSTENMFRASPDVTERRC-----VPQDRAGLHQITVALK  
Platyfish Kank4a -----NGSTENMFRASPDILERRC-----LPQDRAGLHQITVALK  
Amazon Molly Kank4a -----NGSTENMFRASPDILERRC-----LPQDRAGLHQITVALK  
Herring Kank4 -----KENGSEYERLFRADGGDRR-----GSV-----PQDRASLHVQITNALK  
Zebrafish Kank4 -----SQNGSTERLFRPADGGDRR-----GSI-----PQDRASLHQITAAALK  
Cave fish Kank4a -----SQNGSTERLFRPVESDRR-----GSV-----PQDRASLHQITAAALK  
Mouse KANK4 -----LLALPLLQDEGSVCDGAFD-----PAE-----GLMGFQASAAQS  
Rat KANK4 -----LLVLPPLQDEGSVRDGTFD-----PAE-----GLMGFQAAAQS  
Dog KANK4 -----PPALPLLQSEGSVCDGTFG-----PAD-----GFAGFQNSTFRATTQP  
Human KANK4 -----PPALPPLQGEGSVCDGTFE-----PAE-----GLAGFHSSSPRAST  
Eagle KANK4 -----RSGSESAFRPAPRSPGSDG-----PAE-----AALSLAREASSEPGV  
Chicken KANK4 -----DNGSCPESTFRMPRSPDG-----IAS-----LPSLMLSPGAEIASQQQ  
Goose KANK4 -----LQQQEQQPKGSPVREGWHG-----EVP-----  
Anole lizard KANK4 -----CDAKSLENSFSPANESPES-----ESS-----KGVSLTAPDGLMTVKQ  
Turtle KANK4 -----DGKSFTTEIPFSPAKELLD-----HYS-----DSVTLHFPEPRNVQEQIKVVFQ  
Aligator KANK4 -----DGKSFTTEIPFSPAKESLDS-----NCP-----DSLNLNPKDTRIAQQQMEEAMP  
Frog Kank2 -----STSSQQISSFTPLSSGMST-----PVS-----PSPAQLQHVREQMAVALK  
Mouse KANK2 -----SLAGVGLLPPPTPRSSGLST-----PVA-----PS-----AGHLAHVREQMAVALR  
Rat KANK2 -----SLAGVGLLPPPTPRSSGLST-----PVA-----PS-----AGHLAHVREQMAVALR  
Dog KANK2 -----SLVGVGLPPPTPRSSGLST-----PVP-----PSAGHLAHVREQMAVALR  
Human KANK2 -----SLVGVGLPPPTPRSSGLST-----PVP-----PSAGHLAHVREQMAVALR  
Aligator KANK2 -----GPSGLRNSRLSLAGSGLST-----PAT-----PTPGHLQHVREQMAVALR  
Spotted gar Kank2 -----AQGAGGGGQFTPMSSGLST-----PVS-----PT-----PAHLQHVREQMAVALR  
Cave fish Kank2 -----RAQGGAGSSYTPASSGLST-----PVS-----PT-----PAHLQHVREQMAVALR  
Herring Kank2 -----GGGGGGGGSYTPMSSGLST-----PVS-----PT-----PAHLQHVREQMAVALR  
Zebrafish Kank2 -----FNRAQGGGGSYTPMSSGLST-----PVS-----PTPAHLQHVREQMAVALR  
Tetradon Kank2 -----NRAHGGGSFTPIINSGLST-----PVT-----PTPAHLQHVREQMAVALR  
Fugu Kank2 -----NRAHGGGSFTPIINSGLST-----PVT-----PTPAHLQHVREQMAVALR  
Medaka Kank2 -----NRAQGGGGSVTTLNLSGLST-----PVT-----PTPAHLQHVREQMAVALR  
SticklebacK Kank2 -----NRAHGGGGSYTPMSSGLST-----PVT-----PTPAHLQHVREQMAVALR  
Tilapia Kank2 -----NRSQGGGGFTPMSSGLST-----PVT-----PTPAHLQHVREQMAVALR  
Amazon molly Kank2 -----NRAHGGGGFTPMSSGLST-----PVT-----PT-----PAHLQHVREQMAVALR  
Platyfish Kank2 -----NRAHGGGGFTPMSSGLST-----PVT-----PTPAHLQHVREQMAVALR  
Coelacanth KANK2 -----NSQSGVSGQYTPMSSGLST-----PVS-----PT-----PAHLQHVREQMAVALR  
Anole lizard KANK2 -----GSQLGASGQFTPIGSGGLST-----PVS-----PT-----PGHLQHVREQMAVALR  
Turtle KANK2 -----GRLNGSQAGFTPLSSGLST-----PVS-----PSPGHLQHVREQMAVALR  
Tetradon Kank1b -----GSRGSTGCLRLSPSSGRIT-----PVP-----NLG-----PTQLQHVREQMAVALQ  
Medaka Kank1b -----SSLG-----SRGSTGCLQLSPQSSGRST-----PVS-----GPMHLQHVREQMAVALQ  
Amazon molly Kank1b -----LTSSLG-----SRGSTGCLKLSPOSSGRST-----PVT-----SLG-----SMHLQHVREQMAVALQ  
Platyfish Kank1b -----LTSSLG-----SRGSTGCLTLSPQSSGRNT-----PVT-----SLG-----SMHLQHVREQMAVALQ  
Frog Kank4 -----LKFPQSVNSYSESTTQCLE-----GSHHKGSEDTQAVALK  
Zebrafish Kank1b -----TLILGSALKISPSSGRAS-----PAS-----GVSPLHLQMVREQMAVALQ  
Tilapia Kank1b -----TLILGSALKISPSSGRAS-----PAS-----GVSPLHLQMVREQMAVALQ  
Fugu Kank1b -----TLILGSALKISPSSGRAS-----PAS-----GVSPLHLQMVREQMAVALQ  
Cavefish Kank1b -----SSQGQGA-----STMSSTMRISPLSSGRAT-----PVT-----SVS-----PLHLQLVREQMAVALE  
Spotted gar Kank4 -----SENSFWSLNASPSPDNKHQ-----LTA-----QKEMSSLHQFTNALQ  
Coelacanth KANK4 -----NRTSCVDNIFNPANESISQ-----NSS-----KNFVLTKSEEGTNIKE-FQIALQ  
Frog Kank1 -----QANGDYSALE-----ASSLGSSIRHSPSSGVST-----PVT-----NVS-----PMHLQHIREQMAVALK  
Shark Kank1 -----QTNGDYNPYF-----TSSMGSSIRHSPSSGLTT-----PVT-----NVT-----PTHLQHIREQMAVALK  
Coelacanth KANK1 -----QANGDYSALE-----TSSIGSSIRHSPSSGMTT-----PVS-----NVS-----PMHLQHIREQMAVALK  
Mouse KANK1 -----QNGDYNSYVPAAPTSSMGSSVRHSPSSGIST-----PVT-----NVS-----PMHLQHIREQMAVALK  
Rat KANK1 -----QNGDYSSYVPAVPTSSMGSSVRHSPSSGIST-----PVT-----NVS-----PMHLQHIREQMAVALK  
Dog KANK1 -----QNGDYGGYVPAATATSSMGSSIRHSPSSGIST-----PVT-----NVS-----PMHLQHIREQMAVALK  
Human KANK1 -----QNGDYGSYAPAAAPTSSMGSSIRHSPSSGIST-----PVT-----NVS-----PMHLQHIREQMAVALK  
Anole lizard KANK1 -----QNGDYSLHL-----ASSLGSSIRHSPSSGIST-----PVT-----NVS-----PVHLQHIREQMAVALK  
Eagle KANK1 -----QNGDYGACF-----STSLGSSIRHSPSSGIST-----PVT-----NVS-----PVHLQHIREQMAVALK

Chicken KANK1 QGNGDFGACF----GSSLGSSIRHSPMSSGIST-----PVT-----NVS---PVHLQQIREQMAIALK  
 Goose KANK1 QSSGDYGACF----SSSLGSSIRHSPMSSGIST-----PVT-----NVS---PVHLQHIREQMAVALK  
 Turtle KANK1 QGNGDYNVYL----ASSLGSSIRHSPMSSGIST-----PVT-----NVS---PVHLQHIREQMAVALK  
 Aligator KANK1 QGNGDYNVCL----GFLNSSIRHSPMSSGIST-----PVT-----NVS---PVHLQHIREQMAVALK  
 Spotted gar Kank1 QANGEYNPYF----TSSMGSSIRHSPMSSGMTT-----PVT-----NIS---PMHLQQIREQMVALK  
 Herring Kank1 LPNGDYNPYF----TPSMVSSMRHSPMSSGMTT-----PVT-----NVS---PAHLQHIREQMVALK  
 Zebrafish Kank1a LGNGEYNPYF----TSSMGSSIRHSPMSSGMTT-----PVT-----NVS---PLHLQHIREQMVALK  
 Cave fish Kank1a LANGEYNLYL----TSSMGSSIRHSPMSSGMTT-----PVT-----NIS---PLHLQNIIRDQMVALK  
 Stickleback Kank1a PPGNDYSLYY----PSSMVSSIRHSPMSSGVAT-----PVT-----NVS---PLHLQQIREQMVALR  
 Medaka Kank1a LPNGDYGYF----PPSVGSSIRHSPMSSGVAT-----PIT-----NVS---PLHLQQIREQMVALR  
 Fugu Kank1a PHNGEYNPYF----PASMSSIRHSPMSSGMTT-----PVT-----NVS---PLHLHQIREQMVALR  
 Tetradon Kank1a PHNGEYNPYF----PASMSSIRHSPMSSGMTT-----PVT-----NVS---PLHLQQIREQMVALR  
 Tilapia Kank1a LPNGEYNPYF----PPSRGSSIRHSPMSSGVAT-----PVT-----NVS---PLHLQQIREQMVALK  
 Amazon molly Kank1a LSNGEYNPYH----SQSRGSSIRHSPMSSGVAT-----PVT-----NVS---PLHLQQIREQMVALK  
 Mouse KANK3 -----ALSPARAVTRSPRGSGRSS-----PAP-----NPALASPGPAQLQLVREQMAAALR  
 Rat KANK3 -----PAPNPALASPSVPLASPG-----PAP-----PAQLQLVREQMAVALR  
 Dog KANK3 -----APSPGRAVPRSPRGSGRSS-----PAP-----NPAPASPGPAQLQLVREQMAAALR  
 Human KANK3 -----APSPGRGVPRSPRGSGRSS-----PAP-----NLAPASPGPAQLQLVREQMAAALR  
 Lamprey -----AEGNEGARAGSEVARGAEL-----SRYTERVQRLLHEQQA  
 Coelacanth KANK3 -----SPSFTSSIRISPMNSGRST-----PVT-----SIT---PAQLQHVREQMVTALK  
 Frog Kank3 -----SPSFGSGVKISPVNSGRST-----PAM-----ISSSHLHYVREQMAAALK  
 Turtle KANK3 ATP-----GPSLTGSMRSPMNSGRST-----PAT-----NIS---PAHLQHVREQMAAALK  
 Aligator KANK3 ATL-----SPSLTGSMRSPMNSGRST-----PAT-----NLS---ATHLQHVREQMAAALK  
 Eagle KANK3 -----TEGQAGWGRASPSSGRST-----PAA-----GLG---AAPLQHVREQMATALR  
 Chicken KANK3 -----SEGQPGSVRMSPGSSGRST-----PAA-----GLGTAPLQHVREQMAAALR  
 Goose KANK3 -----DPSPARDCRAA-----  
 Spotted gar Kank3 -----SPSQVIWPRASPQNSGRST-----PASGGTSTGLTQIP---PNQLQTVREQMAAALR  
 Zebrafish Kank3 -----NPLSGAWTRASPQNSGRST-----PAS-----NSGTMPPGQLQTVREQMAAALR  
 Cavefish Kank3 VQ-----NPPSTGNRLSPQNSGRST-----PAS-----NCGTSASSSIPPGQLQTVREQMAAALR  
 Herring Kank3 SSASP-----SPCPSGLARASPHTSGRST-----PAA-----ASAQMPPAQLQTVREQMASALR  
 Stickleback Kank3 -----QNPVQSGWTKPSPQTSGRST-----PAV-----GSTMTPIPPSQQLQTVREQMATALK  
 Fugu Kank3 -----QSQPQLQAKPSPQTSGLST-----PAA-----GTTMTPIP---PSQLQTVREQMATALR  
 Tetradon Kank3 -----QNAQPLQAKPSPQTSGLST-----PAA-----AMTPIP---PSQLQTVREQMATALK  
 Medaka Kank3 -----LVVQSSWIKPSPQTSGRST-----PAA-----GATVTPVP---PSQLQTVREQMAIALK  
 Tilapia Kank3 -----QPLQSSWTKPSPQTSGRST-----PAA-----GTTVTPIP---PSQLQTVREQMATALK  
 Amazon molly Kank3 -----PPLQNSWTKPSPQTSGRST-----PAA-----GTTVTPIPPSQLQTVREQMATALK  
 Platyfish Kank3 -----PPLQNSWIKPSPQTSGRST-----PAA-----GTTVTPIP---PSQLQTVREQMATALK

810 820 830 840 850 860 870 880 890 900

Hydra NDQAT-QCSINTLEKSLAVGCSYANL---KTASSQCLVDMKD-----FQCGDNFVKYKDASSNVH-----  
 Trichoplax LITDI-NHSVHY-----QNGHANINPSFQA-----NQTEYKDSQHLNH-----  
 Aplasia RMREL-EEQVKAIP---ILQVRISVL---KEEKRLNLQQLKA---HKANSKPMTRTVGLNTRDVRDWSDRTEFSSY-----SQFERNFSSQ  
 Snail RIKEL-EDQVKVIP---ILQVRISVL---KEEKRLNLQQLKA---SKSNSHPPMISIGVGNRIEVDKVEKLVYSPKQFELPKSFTDSTQSLRSP  
 Fruitfly RLKDL-EEQVKVIP---DMELELNSL---RSEKQKLLRRNEE-----LMRSQRQTPSPSPGL-----  
 Hookworm EVGVAVEPNVADV---LQ-----TDEQAKAHFGVNT-----DEVEKMPDVEKADQST-----  
 C.elegance PSRFA-NNRYDDL---PTPTTFRR---APSQGDLPRGFST---APSTGPGDFASLRRREFALPPEQEH-----HSRRF  
 Tunicate RLRDL-EEQVKVIP---VLQVKISVL---QEKKHLDELKE-----AENKVERLKSPLDDLHDN-----  
 Spider RMREL-EEQVKSIP---ILEIKLSAL---KEEKNSLLNQLKL---KESKLQNKSVNSDGDLDQ-----KQLKRENE  
 Lingula KMRDL-EEQVKSIP---LLQTRMSVL---KEEKRLLELQLLA---KQSKPTSTYSIGVGYRVDVEEPAPRR---PDMRSIGVG  
 Lancelet RIKVL-EEQVKEIP---VLQVKISVL---KEEKRLLVMLKLS---KNGE---QNLKPEDTDNKRKQDGDKDGTT---KRLHRRSLS  
 Medaka Kank4b RVGEL-EMEVVVIP---ELRAQICIL---QEERERLRGLVH---HLLSSTENGTTKRF-----  
 Amazon molly Kank4b RVGEL-EMEVVVIP---ELRAHICIL---QEERERLRGLVH---HIPSTVNGTTDLH-----  
 Platyfish Kank4b RVGEL-EMEVVVIP---ELRAQICIL---QEERERLRGLVH---HIPSSVNGTTDLH-----  
 Stickleback Kank4b -----EKTAKTKP-----  
 Fugu Kank4b RVREL-EMEIRVIP---ELKAQICIL---QEERORLQPGLLS---QSVNGTTSLYDRNHNISQGDST-----  
 Tetraon Kank4b -----



Cave fish Kank4b RTAEL-EEEIRVIP---ELKAQICIL---QEEREMILLYKFQT-----QISPSTKEPVDFFSSGSPQSS-----  
 Medaka Kank4a RVREL-EEQVKTIP---ELKAQICSL---REEREQLLNQLKV-----QTQTLVSTSSSSAAKSPD-----AASA  
 Fugu Kank4a RVREL-EEQVKTIP---ELKAQICSL---REEREKLLLLQLQA-----HVC TSPSTVVPSSNTE TL-----  
 Tetradon Kank4a RVREL-EEQVKTIP---ELKAQIFSL---KEEREQLLLQLQA-----HVSTSPSAVDPG SYT-----  
 Stickleback Kank4a RVREL-EEQVKTIP---ELKAQICSL---REEREKLLLLQLHA-----HAQAQSKAQVSSLPST-----  
 Tilapia Kank4a RVREL-EEQVKTIP---ELKAQICSL---REEREKLLLLQLQA-----QAKAQASKLSTTVPTGY-----  
 Platyfish Kank4a RVREL-EEQVKTIP---ELKAQICSL---REEREKLLCQIQTFQVQASTSSSAMATTYETGGISQRQRPRPSEGLNLSLAIQTVQGVASEHVPVNVVEE  
 Amazon Molly Kank4a RVREL-EEQVKTIP---ELKAQICSL---REEREKLLRQIQTSQVQASTSSSAMATTYETGGNSQRQRPRPSEGLNLSLAIQPVRGVASEHVPVNVVEE  
 Herring Kank4 RVREL-EEQPPTPEEETKTRVEESEA---EEPEEEAAETQK-----PQTS EIQTEALERGP E EIT-----E  
 Zebrafish Kank4 RVREL-EEQVRTIP---ELKAQICSL---RTEREGLLQKILQ-----HQSEQKREPLQKKEIEVL-----QADLQVSALPPST  
 Cave fish Kank4a RVREL-EEQVRTIP---ELKSQICSL---REEKEKLLQRIQE---QAERKAEPSEKSPEDSTEHPVATQQQEK A-----SAFSEDITVV  
 Mouse KANK4 VDREL-GELEPAIP---EQVWEG AEP---EEGDLKASSHLSQ-----PGPSSAVQSVEMDLEEV EIE-----  
 Rat KANK4 TDRAV-EELEPAIP---EPVWEG AEP---EEGDIKAASHLSQ-----PAPSSSVQNVSVLDLEEV DIQ-----  
 Dog KANK4 KVREF-GDLVPGIP---ELVQEGTELP EGEDEEAPNHL SLP S-----PPFFSQDALVVLVEDEEDEPKTR-----  
 Human KANK4 RIPELVQEGAE--P-----PEGVVKVPNHLPL-----PGPPFSFQNVLVVLEDK EDE-----  
 Eagle KANK4 SLGQK-EHPGGGGPGPRQTQPPRQSQ---HPAAPQLQAVMES-----GGEEGD AADAGGRSAS-----AG  
 Chicken KANK4 EWPGK-GGLVRDVP---KERAQPLWQG-QHSAVQLQVVMES-----RGEEGDASDATNGSTL-----  
 Goose KANK4 -----KERAPAQP---PRQGGHAAV-----QQLQVVVES-----GAEEGDAADM-----  
 Anole lizard KANK4 KINKL-----VP-----ETERENTQLGLNQ-----KHIVKERM RPSASWEGQPF-----  
 Turtle KANK4 KNEQPEGQVKAIP---ELDPQPLEF---PRERMLIQSPHQS-----QHFI AQE LLLVTE SGGEECY-----  
 Aligator KANK4 KNKQL-GEQAKTTP---ELDHQPEEH---POEGKEIQSPQPS-----QPSTVQEP L MVIESGEE ECE-----  
 Frog Kank2 KLRQL-EEQVKMIP---VLQVKISVL---QEEKRQLSVQLKS-----QKYLGHPRGNIRGKDR-----  
 Mouse KANK2 KLRQL-EEQVKLIP---VLQVKLSVL---QEEKRQLTVQLKS-----QKFLGHPSGTRSRSEL-----  
 Rat KANK2 KLRQL-EEQVKLIP---VLQVKLSVL---QEEKRQLTVQLKS-----QKFLGHPSGTRSRSEL-----  
 Dog KANK2 KLRQL-EEQVKLIP---VLQVKLSVL---QEEKRQLTVQLKS-----QKFLGHPTGARSSEL-----  
 Human KANK2 KLRQL-EEQVKLIP---VLQVKLSVL---QEEKRQLTVQLKS-----QKFLGHPTAGRGRSEL-----  
 Aligator KANK2 QLRQL-EEQVKLIP---VLQKVAVL---QEEKRQLSTRLOS-----RRGLGQPVGGPG-----  
 Spotted gar Kank2 KIREL-EEQVKMIP---VLQVKISVL---QEEKRQLSVQLKS-----QKFLGHTMGEFGKGRSR-----  
 Cave fish Kank2 KIRD L-EEQVKTIP---VLQVKISVL---QEEKRQLSVQLKS-----QKFLGVRGRSRPR-----  
 Herring Kank2 KIREL-EEQVKTIP---VLQVKISVL---QEEKRQLSVQLKS-----QKFLGHTLGFGGSSG-----GR  
 Zebrafish Kank2 KIREL-EEQVKTIP---VLQVKISVL---QEEKRQLSVQLKS-----QKFLGHTLGFNRSRPR-----  
 Tetradon Kank2 KIREL-EEQVKTIP---VLQVKISVL---QEEKRQLSVQLKS-----QKFLGHTLGF SRGRSR-----  
 Fugu Kank2 KIREL-EEQVKTIP---VLQVKISVL---QEEKRQLSVQLKS-----QKFLGHTLGF SRGRSR-----  
 Medaka Kank2 KIREL-EEQVKTIP---VLQVKISVL---QEEKRQLSVQLKS-----QKFLGHTLGF SRSRPR-----  
 Stickleback Kank2 KIRD L-EEQVKTIP---VLQVKISVL---QEEKRQLSVQLKS-----QKFLGHSLSFNVRPR-----  
 Tilapia Kank2 KIREL-EEQVKTIP---VLQVKISVL---QEEKRQLSVQLKS-----QKFLGHTLGFNRSRPR-----  
 Amazon molly Kank2 KIREL-EEQVKTIP---VLQVKISVL---QEEKRQLSVQLKS-----QKFLGHTLGF SRGRNR-----  
 Platyfish Kank2 KIREL-EEQVKTIP---VLQVKISVL---QEEKRQLSVQLKS-----QKFLGHTLGF SRGRNR-----  
 Coelacanth KANK2 KLRQL-EEQVKMIP---VLQVKISVL---QEEKRQLSVQLKS-----QKFLGHTTGFGKPKPR-----  
 Anole lizard KANK2 KLRLL-EEQVKMIP---VLQVKISVL---QEEKRQLSVQLKS-----QKFLGHPGGFCGKGR-----  
 Turtle KANK2 KLRQL-EEQVKIIP---VLQVKISVL---QEEKRQLSVQLKS-----QKFLGHPGGFCGKGR-----  
 Tetradon Kank1b KLKEL-EEQVKIIP---VLQVKISVL---QEEKRLLACQLKT-----QSDSEEFNGGLRDAPQSPPEKGD-----  
 Medaka Kank1b KLKEM-EEQVKMIP---VLQVKISVL---QEEKRQLSVQLKN-----QNDNENINNL IWNRS CDVEM-----  
 Amazon molly Kank1b KLKEL-EEQVKIIP---ILQVKISVL---QEEKRQLVSQ L S D-----SKSINDMTWRTCLGEDGID-----  
 Platyfish Kank1b KLKEL-EEQVKIIP---ILQVKISVL---QEEKRQLVSQ L S D-----SKSINDMTWRTCLGEDGID-----  
 Frog Kank4 RIKDL-EEQLQTVT---EHKKTISEL---EGENSKLNAQLKS-----ISELLTSNRMENENVD-----  
 Zebrafish Kank1b RLKDL-EEQVKAIP---LLQVKISVL---QEEKRQLAALVKS-----QDEDQKSGSSIDQ EY-----  
 Tilapia Kank1b RLKDL-EEQVKAIP---LLQVKISVL---QEEKRQLAALVKS-----QDEDQKSGSSIDQ EY-----  
 Fugu Kank1b RLKDL-EEQVKAIP---LLQVKISVL---QEEKRQLAALVKS-----QDEDQKSGSSIDQ EY-----  
 Cavefish Kank1b RLKEL-EEQVKTIP---MLQIKISTL---QEEKRQLVALVKQ---QEGQSLSSSTLSDSLQGLFRKRAHSTG STLQ Q-----LQQH  
 Spotted gar Kank4 RVKEL-EEQARMIP---ELEEKQLI---LKLPPQSVA TEE---KTLHSEHERRNGQSQCL-----  
 Coelacanth KANK4 RIKEL-EEKVKSIP---NLKKQILLL---KEEKNV LITQLQN---QSFA-----TEFKDAQSLTLHKGSR-----  
 Frog Kank1 RLKEL-EEQVKTIP---ILQVKISVL---QEEKRQLMSEIKS-----QKLSNQKDTAGFRKRSYSAGNAAGF-----E  
 Shark Kank1 RLKEL-EEQVKAIP---ILQVKISVL---QEEKRQLASQLS-----HKLSSQNVAPGFRKRSYSAGNADQL-----  
 Coelacanth KANK1 RLKEL-EEQVKTIP---ILQVKISVL---QEEKRQLVSQ L S-----EKISNQNC SFNFRKRSYSAGNVDF-----EQLAQ  
 Mouse KANK1 RLKEL-EEQVRTIP---VLQVKISVL---QEEKRQLASQLS-----QRASSQNEACGVVRKRSYSAGNASQL-----ELLARA  
 Rat KANK1 RLKEL-EEQVRTIP---VLQVKISVL---QEEKRQLASQLKN-----QRAASQNEACGVVRKRSYSAGNASQL-----ELLSRA

Dog KANK1 RLKEL-EEQVRTIP---VLQVKISVL---QEEKRQLASQLKN-----QRATAQNDACGVVRKRSYSAGNASQL-----EQLSRA  
Human KANK1 RLKEL-EEQVRTIP---VLQVKISVL---QEEKRQLVSQLKN-----QRAASQINVCGVVRKRSYSAGNASQL-----EQLSRA  
Anole lizard KANK1 RLKEL-EEQVKTIP---VLQVKISVL---QEEKRQIMAKLKN-----QRIVNQNDTGHFRKRSYSAGNAEHW-----KNLSP  
Eagle KANK1 RLKEL-EEQVKTIP---VLQVKISVL---QEEKRHMMAELKN-----QRKATQNDTYGFRKRSYSAGNAEQW-----EHMSQ  
Chicken KANK1 RLKEL-EEQVKTIP---VLQVKISVL---QEEKRHMMAELKS-----QRKSSQNDVYGFVRKRSYSAGNAEQW-----EHLSD  
Goose KANK1 RLKEL-EEQVKTIP---VLQVKISVL---QEEKRHMMAELKS-----QRKPSQNDYGFVRKRSYSAGNAEQW-----EHLSD  
Turtle KANK1 RLKEL-EEQVKTIP---VLQVKISVL---QEEKRQMMALQKS-----QRIPNQNDTYGFRKRSYSAGNAEQW-----GHLSQ  
Alligator KANK1 RLKEL-EEQVKTIP---VLQVKISVL---QEEKRQMVAEELKS-----QRKPSQNETYGFVRKRSYSAGNAEQW-----EHLSD  
Spotted gar Kank1 RLKEL-EEQVKTIP---VLQVKISVL---QEEKRQLAAQINN-----QKSTSQSIGHGFRKRSYSAGNAQQF-----D  
Herring Kank1 RLKEL-EEQVKTIP---ILQVKIAVL---QEDKRQIQKNQKL-----AGQQGAGAGGFRKRSYSVGSADQF-----EP  
Zebrafish Kank1a RLKEL-EEQVKTIP---ILQVKISVL---QEEKRQLVSQLKN-----SKVVGQSGGCFRKRFSVGSADQY-----  
Cave fish Kank1a RLKEL-EEQVKTIP---ILQVKISVL---QEEKRQLVSQLKN-----PKLAGQGPLGGFRKRSYSVGSADQY-----  
Stickleback Kank1a KLKEL-EEQVKTIP---ILQVKIAVL---QEEKRQLAAQSKS-----QAAGSFRKRFSVGSAAQM-----E  
Medaka Kank1a RLKEL-EEQVKTIP---ILQVKIAVL---QEEKRQLAAQSKS-----PGPAGFRKRFSVGSAAQM-----  
Fugu Kank1a RLKEL-EEQVKTIP---ILQVKIAVL---QEEKRQMAAQSKN-----QPGGFRKRFSVGSADQM-----  
Tetradon Kank1a RLKEL-EEQVKTIP---ILQVKIAVL---QEEKRQMAAQSKN-----QPGGFRKRFSVGSADQM-----  
Tilapia Kank1a RLKEL-EEQVKTIP---ILQVKIAVL---QEEKRQLAAQSKG-----QGLGGFRKRFSVGCADQM-----  
Amazon molly Kank1a RLKEL-EEQVKSIP---ILQVKIAVL---QEEKRQLAAQKNK-----QGLGGFRKRFSVGSADQM-----  
Mouse KANK3 RLREL-EDQARALP---ELQEQVRAL---RAEKARLLAGRVQ-----PEQVEIEARPDKLAQLRRL-----  
Rat KANK3 RLREL-EDQARALP---ELQEQVRAL---RAEKARLLAGRVQ-----PEQVVEIEVREDKLSQLRRL-----  
Dog KANK3 RLREL-EEQARALP---ELQEQVRTL---RAEKARLLAGRGL-----PEPD---AEAEARPDKLAQLRRL-----TERLATYERG  
Human KANK3 RLREL-EDQARTLP---ELQEQVRAL---RAEKARLLAGRAQ-----PEPDGEAETREDKLAQLRRL-----  
Lamprey LLTDNYAELADAFDAFA---EPATELGSL---SSRLLTVTVA-----LSSLQRPAPTPARAGS-----  
Coelacanth KANK3 QLKDL-EEQVKTIP---ALERKISML---QEEKELSSSELRK-----RKALDTSEAFSFRQRSYSAGHTGVV-----  
Frog Kank3 QLKDL-EEQVKAIP---ILEMKISTL---ESEKQLLADLEK-----KQEIPLERSFSAVNCNLN-----  
Turtle KANK3 QLKEL-EEQVKTIP---VLEMKICKL---KREKELMAGLQE---QPLP---ETSEASVFSFPPRSLGAEVARAS-----  
Alligator KANK3 QLKEL-EEQVKTIP---VLEMKISKL---KQEKELLAGLQE---KASPETCETSFTFPQSPASEEQ-----  
Eagle KANK3 QLKEL-EEQVKTIP---LLEMQICEL---KREKAKLMEKLSA-----EPGEAFGHPSGSAVAGC-----  
Chicken KANK3 QLREL-EEQVKTIP---LLEMRICEL---QREKAKLMEKLSA-----EPSKVSLDHPDGSSEEQP-----  
Goose KANK3 -----  
Spotted gar Kank3 QLKEM-EERVKGVP---ALEREVAKL---RAEKEELQALRE---KVGQSKIAELRKLTERLGGREDR-----  
Zebrafish Kank3 QLREM-EERVKGVP---VLEREVAML---RAEKERLSEVELQN-----KTKEL-----  
Cavefish Kank3 QLKEM-EKVKGVP---ALEREVTL---RAEKDRLELALQQ-----KTEELAAALAEAAASS-----  
Herring Kank3 QLKEM-EERVKGVP---VLEREVAKL---RAEKDQLLQVLKK---KNEAPATMAAAVQATALAEPGTGGDQ-----  
Stickleback Kank3 QLKEM-EERVKGVP---ALENEVAKL---RAEKDALLLALQE---KKEAREVTQLKQKSTESF-----  
Fugu Kank3 QLKEM-EERVKGVP---ALEKELASV---RAEKDVLALLALQE---RLTEKFEGRDGKASSK-----  
Tetradon Kank3 QLKEM-EERVKGVP---ALEKELAGL---RAEKDALLLALQE---AQRQPTSDSFTQTT-----  
Medaka Kank3 QLKEM-EERVKGVP---ALEKEVANL---RAEKDMLLALQE---KKAAPGFVQERRPSAESSTQ-----  
Tilapia Kank3 QLKEM-EERVKGVP---ALEKEVAKL---RAEKDMLLALQE---KKAAMDLAQQKQFTETSTQTV-----  
Amazon molly Kank3 QLKEM-EERVKGVP---ALEKELAKL---RAEKDMLLALQE---KKAAMEASHQKQSKESSTQTT-----  
Platyfish Kank3 QLKEM-EERVKGVP---ALEKELAKL---RAEKDMLLALQE---KKAAMEVSHQKQSKES-----

910 920 930 940 950 960 970 980 990 1000

Hydra -----LFMKDAWTSRRI-----  
Trichoplax -----NGSIPSPMA-----  
Aplasia NQRTPPATLPPKPVRTVSVGVGDHSVVEPYLLQPSLPTGYVLWNETVTELR-----STSMMEQESYRNRIPLNSLFSQQ  
Snail LAKTPPATLPPKPVKTSTTGVGDHSVIEPYLLQPELPTGYTIEDNVTHTEIH-----TTTVIDERDLLKSFQPPSLNVSFH  
Fruitfly -KTASPVQFTPQRISPVSLLESLGARMRSSTSSASPSVVRDVTQAVVR-----  
Hookworm ---ATEFLEKSASVDQETMTTRTYRNIPIPSQTDSPVEEAREVVVPDSCA-----  
C.elegance FSASPKLPRRGLQAGPSIDVESHFTYAQTQNGQKVLARTQSTSTSPPPQAP-----  
Tunicate ----KLSPRKSLSTSSGFSSSSSSQSSISSPRSPPTSPGLPRSLVVEVK-----  
Spider GIMSPTTLTKKCLSRNMDNLSSEVIASCIDAAAMAKSFLEKEIISHIKMC-----  
Lingula NKSVTELYTLQPHLLESQTEKEMHTQRLIREKETKVVVVVGOEQRPTSPYS-----  
Lancelet TGSFQMLEQQWKEQQAEQEKQKASKDAPAPSEKNSTAKKPKVPPPPVPRFRSVVGDTTSLSDIVCYNSALRTTDDVGTNTTVPSRDIGVGYSPMRHV  
Medaka Kank4b -----ALTHRSIVDMKRPKVRNSTS-----  
Amazon molly Kank4b -----TSSQYKGDVLSQRESHVMFPRNHNV-----



Platyfish Kank4b -----TSSPYGKGDVLKSQRESHVMFPRNHV-----  
Stickleback Kank4b -----  
Fugu Kank4b -----  
Tetraon Kank4b -----  
Cave fish Kank4b ----SHFTSSAVVSKTAEIQNKANDDWMNREYDQLEENVKASSEQVDAIVI-----  
Medaka Kank4a IHFKGPSAEQDFSLITQVSGGSEAAETALEEKVTVKETATAVAVRQTQPPKKL-----  
Fugu Kank4a -PSGSTQATGVSECLPTKEITGKEKISVLVKEVDINSERVEICSTHKETGQ-----  
Tetradon Kank4a ----ESQEHKPPERLSPSVSTQPTGVSECLPTKELPSLVEV-----  
Stickleback Kank4a -----IASKHDSGTHTQPQGORPSAGLNTSAHLQTSRLSEQELQETEL-----  
Tilapia Kank4a -----DPRTNNSQSQQRPSQEMKLEKTESPLGQTVQKLPDIS-----  
Platyfish Kank4a SHRETKRTELPIQKDPSTNQKQSVSPSEKADKQKETSLSLQDNAEERLSQDTEVVAKSESEIIRESNASKEDQNGMLKLEEKLMLEAKLTQASQELERTN  
Amazon Molly Kank4a SHRETKRTELPIQRDPSTNQKQSVSPSETADKQRETSKSLQDNAEERLSQDTEVVAKSESEIIRESNASKEDQNGMLKLEEKLMVLEAKLTQASQELERTN  
Herring Kank4 ALVSVPETETETRDSETSEITQADAEPAHQEETQKISAQEFKPVESRQ-----  
Zebrafish Kank4 SGKEDALFLSKNKVADHEIVHEVPSDRSTEQLPEKPHFEVQLNVQPDSSKIN-----  
Cave fish Kank4a DHKSKPPASAEPTVEPQTTEGQDLVAQDLAEKETSLSAVSVQVPTVMSP-----  
Mouse KANK4 -HHMREAEVLVTPGSATPSPPLPSPILENDLSLDEIELSISEIPPPPI-----  
Rat KANK4 -HHTRTADLALSPGSSTPSPPLPSPPIENELSLLEEIELNISEIPPPPI-----  
Dog KANK4 -EAEVVVSPGSPTPSPPLPSPPIENEFLEEIELNISEIPPPPV-----  
Human KANK4 -HNAREAEVLFTPGSPTPSPPLPSPPIENELLEEIELNISEIPPPPV-----  
Eagle KANK4 VEPASPAALQLAESTNPGEGELSVSEMALDVVK-----  
Chicken KANK4 -VSASPGALQLADESTNHGKAGGSVSEIALNLKEGEDRCAH-----  
Goose KANK4 -----VPASPGAPQLAEGSVSPGRVEKSEIAPSVLKEDEYGGARTQ-----  
Anole lizard KANK4 ----ISQELLVVAESGEECDTVEMNIRPPVQSGSSCSMTLEYKFENQIP-----  
Turtle KANK4 ----APEYNKCPLELVKDESISSHAPKFMENENREEIKLNISEIMPCAPE-----  
Aligator KANK4 ----TPAMETFTQLVKDVSSSKPLFDENENHEEIELNINEVMPSE-----  
Frog Kank2 GELYEIEPEEESKVEKEEGEDKVAGKEGPEKENKKPEGEIKNPKEVC-----  
Mouse KANK2 -----CLDLPEAPDDPA-----  
Rat KANK2 -----CLDLPEAPDDPA-----  
Dog KANK2 -----CLDLPEPLEDPV-----  
Human KANK2 -----CLDLDPPEDPV-----  
Aligator KANK2 -----ELYIDLPEEEMAARGT-----  
Spotted gar Kank2 ----GELYIDIPEEDSTGFVAAAARGGGLSPTTPEGSRQDSGCEIEDTVIV-----  
Cave fish Kank2 ----ELYIDIPEEEVGGATTKAATTTGLSPTTPEGSRQDSGCEIEDTVIV-----  
Herring Kank2 GRPRGELYIDIPEEDTTAAGTKATATGVTAGADRASRGLSPTTQADGSRQ-----  
Zebrafish Kank2 ----GELYIDIPEEEAGNGAGAANKATGSLSPPTPGSLQDSGCEIEETVI-----  
Tetradon Kank2 ----GELYIDIPEEEDTTG-----  
Fugu Kank2 ----GELYIDIPEEEVGPAA-----  
Medaka Kank2 ----GELYIDIPEEEASTGAP-----  
Stickleback Kank2 ----GELYIDIPEEPEP-----  
Tilapia Kank2 ----GELYIDIPEEDMS-----  
Amazon molly Kank2 ----GELYIDIPEEEVGTAAKSTKTE---SLSPTEVSKQDSGCEIEDTVI-----  
Platyfish Kank2 ----GELYIDIPEEEGPEG-----  
Coelacanth KANK2 ----GELYIDIPEEDSDQSGSVFSPPLPGSSRSHSGTEIEGSMQORSLIKS-----  
Anole lizard KANK2 ----GELYIDIPEEGTSGNTEEGKVRPDTGARLD-----  
Turtle KANK2 ----GELYEIEPEEEGGGGAG-----  
Tetradon Kank1b ----RVEVPPRKPSKENTFVYTD-----  
Medaka Kank1b ----TDSNDKGADEELADPGNFKEVRQLSEMDALEKAIKEGPL-----  
Amazon molly Kank1b ----FENKRHTEAESKGTNENVYTDREFRELTEEMQALERTIKGGHM-----  
Platyfish Kank1b ----FENKRHTEETSEGTNEKVYTDREFRELTEEMQALERTIKGGHM-----  
Frog Kank4 ----LNISESEAQPEAITGN-----  
Zebrafish Kank1b ----INKPSVEGWEHKTMTSLKDFQLLSVEMQLLERKIQDARI-----  
Tilapia Kank1b ----INKPSVEGWEHKTMTSLKDFQLLSVEMQLLERKIQDARI-----  
Fugu Kank1b ----INKPSVEGWEHKTMTSLKDFQLLSVEMQLLERKIQDARI-----  
Cavefish Kank1b DVKMOKTKESKRESSGEVEGWEHGALSGLQEFKQLSAEMHLEKIKIQDARL-----  
Spotted gar Kank4 ----NNTPASQLSAQCMSASADKLRDQDTQKTVKALA-----  
Coelacanth KANK4 ----ELDNSVNEGVIATNGYKVAKNQNIPLDVTIPESTSMHTKQNTNVMS-----  
Frog Kank1 PPSRVRSAGELHIDSDEMETPEQNSQTLKEFRQLTAEMLQALEKKIHDSL-----

Shark Kank1 ---EPLRGE<sup>L</sup>HDSEDE<sup>M</sup>ESLE<sup>Q</sup>SSLR<sup>M</sup>EEFR<sup>Q</sup>LTA<sup>E</sup>VQAL<sup>E</sup>RKI<sup>Q</sup>DN<sup>G</sup>D-----  
Coelacanth KANK1 IRRSGE<sup>Q</sup>VGEL<sup>H</sup>IDSEDE<sup>I</sup>ESME<sup>Q</sup>SSQR<sup>V</sup>KEFR<sup>Q</sup>LTA<sup>E</sup>MQAL<sup>E</sup>RKI<sup>Q</sup>ES<sup>N</sup>E-----  
Mouse KANK1 RRGGGELY<sup>I</sup>DYEEEE<sup>M</sup>ESVE<sup>Q</sup>STQ<sup>R</sup>IQ---E<sup>F</sup>RQLTAD<sup>M</sup>QAL<sup>E</sup>RKI<sup>Q</sup>DSS<sup>C</sup>-----  
Rat KANK1 RRGGGELY<sup>I</sup>DYEEEE<sup>M</sup>ESVE<sup>Q</sup>STQ<sup>R</sup>IR---E<sup>F</sup>RQLTAD<sup>M</sup>QAL<sup>E</sup>QKI<sup>Q</sup>DSS<sup>C</sup>-----  
Dog KANK1 RRSGGELY<sup>I</sup>DYEEEE<sup>M</sup>ESVE<sup>Q</sup>SAQ<sup>S</sup>IR---E<sup>F</sup>RQLAAD<sup>M</sup>QAL<sup>E</sup>RKI<sup>Q</sup>DSS<sup>C</sup>-----  
Human KANK1 RRSGGELY<sup>I</sup>DYEEEE<sup>M</sup>ETVE<sup>Q</sup>STQ<sup>R</sup>IK---E<sup>F</sup>RQLTAD<sup>M</sup>QAL<sup>E</sup>QKI<sup>Q</sup>DSS<sup>C</sup>-----  
Anole lizard KANK1 ARGGGELY<sup>I</sup>DCEDDA<sup>G</sup>STIE<sup>Q</sup>SS---E<sup>R</sup>IEEFR<sup>Q</sup>LTA<sup>E</sup>MQAL<sup>E</sup>KKI<sup>Q</sup>DSS<sup>Y</sup>-----  
Eagle KANK1 VRRGGELY<sup>I</sup>DCEEVE<sup>S</sup>VE<sup>Q</sup>SS---Q<sup>G</sup>IEEFR<sup>Q</sup>LTA<sup>E</sup>MQAL<sup>E</sup>KKI<sup>Q</sup>DSS<sup>Y</sup>-----  
Chicken KANK1 VRRGGELY<sup>I</sup>DCEDE<sup>M</sup>ESA<sup>E</sup>QSS---R<sup>R</sup>VEEFR<sup>Q</sup>LTA<sup>E</sup>MQAL<sup>E</sup>KKI<sup>Q</sup>DSS<sup>Y</sup>-----  
Goose KANK1 GRRGGELY<sup>I</sup>DCEDE<sup>M</sup>SME<sup>Q</sup>SS---Q<sup>R</sup>IEEFR<sup>Q</sup>LTA<sup>E</sup>MQAL<sup>E</sup>KKI<sup>Q</sup>DSS<sup>Y</sup>-----  
Turtle KANK1 VRRGGELY<sup>I</sup>DCEEVE<sup>Q</sup>NSQ<sup>R</sup>TE---E<sup>F</sup>RQLTF<sup>E</sup>MQAL<sup>E</sup>RKI<sup>Q</sup>DSS<sup>Y</sup>-----  
Aligator KANK1 VRRGGELY<sup>I</sup>DCEEDV<sup>E</sup>HVE<sup>Q</sup>SS---Q<sup>R</sup>IEEFR<sup>Q</sup>LTA<sup>E</sup>MQAL<sup>E</sup>KKI<sup>Q</sup>DSS<sup>Y</sup>-----  
Spotted gar Kank1 QLSQLKKGSEL<sup>H</sup>INSEDE<sup>L</sup>ENME<sup>H</sup>SSQ<sup>R</sup>IEEFR<sup>Q</sup>LTA<sup>E</sup>MQAL<sup>E</sup>RKI<sup>Q</sup>DSS<sup>Y</sup>-----  
Herring Kank1 LAQLKQGSSEL<sup>H</sup>IDSEDE<sup>L</sup>EGME<sup>Q</sup>SSLR<sup>L</sup>QEFR<sup>Q</sup>LTA<sup>E</sup>MQAL<sup>E</sup>KKI<sup>Q</sup>EPGA-----EK  
Zebrafish Kank1a --EPLSQIKTGSSEL<sup>H</sup>IEEID<sup>N</sup>TEQSTQ<sup>R</sup>LQEFR<sup>Q</sup>LTA<sup>E</sup>VEAL<sup>E</sup>RNI<sup>Q</sup>DNG<sup>E</sup>-----  
Cave fish Kank1a --EPVAQLKSGSEL<sup>H</sup>IDPEN<sup>V</sup>EQSSQ<sup>R</sup>LQEFR<sup>Q</sup>LTA<sup>E</sup>VQAL<sup>E</sup>KKI<sup>Q</sup>DSS<sup>N</sup>E-----  
Stickleback Kank1a APGAERQETEL<sup>H</sup>IMEPEA<sup>Q</sup>RQDA<sup>Q</sup>RLDCA<sup>E</sup>FR<sup>R</sup>LAA<sup>E</sup>VQAL<sup>D</sup>GNAA<sup>D</sup>ARE-----  
Medaka Kank1a ---ENPAA<sup>Y</sup>KEA<sup>E</sup>LHIMEPEA<sup>Q</sup>EQSA<sup>Q</sup>QLLE<sup>L</sup>RRLTA<sup>E</sup>VQAL<sup>E</sup>KTK<sup>N</sup>NRW-----  
Fugu Kank1a --ENPGPVQKEPEL<sup>H</sup>IREPEA<sup>Q</sup>EQSSQ<sup>C</sup>LEEF<sup>R</sup>RLAA<sup>E</sup>VQAL<sup>E</sup>KTT<sup>R</sup>ENKI-----  
Tetradon Kank1a --ENPGPFKEPEL<sup>H</sup>IREPEA<sup>Q</sup>EHSSQ<sup>C</sup>LEEF<sup>R</sup>RLAA<sup>Q</sup>VQAL<sup>E</sup>KTSQ<sup>E</sup>SNM-----  
Tilapia Kank1a --ENPGPIQKETEL<sup>H</sup>ITEPEA<sup>Q</sup>EQSA<sup>Q</sup>RLEEF<sup>R</sup>RLAA<sup>E</sup>VQAL<sup>E</sup>KTSED<sup>N</sup>AN-----  
Amazon molly Kank1a ---ENSGSIQKETEL<sup>R</sup>IIEPEA<sup>Q</sup>EQSA<sup>Q</sup>RLEEF<sup>R</sup>RLAA<sup>E</sup>VQAL<sup>E</sup>KTK<sup>E</sup>NNI-----  
Mouse KANK3 ---TERLATS<sup>D</sup>RGVRS<sup>R</sup>ASPR<sup>A</sup>EDPD<sup>G</sup>LAARR<sup>S</sup>EGAL<sup>Q</sup>VLD<sup>P</sup>GSRT<sup>P</sup>DG-----  
Rat KANK3 ---TERLATS<sup>D</sup>RGVRS<sup>R</sup>ASPR<sup>A</sup>EDPD<sup>G</sup>LAARR<sup>S</sup>EGAL<sup>Q</sup>VLD<sup>P</sup>ASRT<sup>P</sup>DG-----  
Dog KANK3 VRRARAGPWADG<sup>P</sup>DPAS<sup>R</sup>REG<sup>E</sup>AL<sup>E</sup>VPDA<sup>A</sup>GI<sup>P</sup>DAAP<sup>Q</sup>TRD<sup>A</sup>GTQ<sup>A</sup>VP<sup>E</sup>TQ-----  
Human KANK3 ---TERLATS<sup>E</sup>RGC<sup>R</sup>ARAS<sup>P</sup>RAD<sup>S</sup>PD<sup>G</sup>LAAR<sup>S</sup>EGAL<sup>Q</sup>VLD<sup>G</sup>EVG<sup>S</sup>LDG-----  
Lamprey -----  
Coelacanth KANK3 -DAKAKARQD<sup>H</sup>HGE<sup>F</sup>DSE<sup>E</sup>AVK<sup>I</sup>RTSK<sup>I</sup>VEL<sup>R</sup>RLTE<sup>K</sup>LTN<sup>L</sup>ERN<sup>P</sup>KCE<sup>K</sup>T-----  
Frog Kank3 -ESCSEQNI<sup>E</sup>LPSE<sup>T</sup>ENE<sup>L</sup>ETSK<sup>L</sup>RTNK<sup>I</sup>AEL<sup>K</sup>RRLTE<sup>K</sup>LAV<sup>P</sup>ERN<sup>V</sup>KMS<sup>R</sup>T-----  
Turtle KANK3 ---QEAPAE<sup>L</sup>ERLE<sup>S</sup>VKAR<sup>A</sup>SKITEL<sup>R</sup>RLTE<sup>K</sup>LSAS<sup>D</sup>RNV<sup>R</sup>ASKA-----  
Aligator KANK3 ---PPVSQEAQGE<sup>L</sup>EGESE<sup>M</sup>GKAR<sup>A</sup>SKITEL<sup>R</sup>RLTE<sup>K</sup>LS<sup>E</sup>RNV<sup>R</sup>AG<sup>R</sup>T-----  
Eagle KANK3 ---EPPRAG<sup>P</sup>ES<sup>E</sup>TEPA<sup>K</sup>GR<sup>A</sup>SKVA<sup>E</sup>LRLTE<sup>K</sup>LAV<sup>P</sup>ERS<sup>G</sup>RAW<sup>P</sup>G-----  
Chicken KANK3 ---QAELEGE<sup>A</sup>EPGK<sup>R</sup>ASKIA<sup>E</sup>LRLTE<sup>K</sup>LAV<sup>P</sup>ERS<sup>S</sup>VP<sup>G</sup>-----  
Goose KANK3 -----  
Spotted gar Kank3 --NSEQV<sup>E</sup>RTM<sup>V</sup>VER<sup>K</sup>SVG<sup>V</sup>GG<sup>D</sup>RPLE<sup>E</sup>GV<sup>F</sup>YR<sup>K</sup>G<sup>T</sup>KE<sup>V</sup>AV<sup>G</sup>TEA<sup>V</sup>E<sup>A</sup>CE-----  
Zebrafish Kank3 ---EAAIKL<sup>Q</sup>VPTEA<sup>V</sup>EE<sup>Q</sup>DK<sup>E</sup>QIK<sup>K</sup>IPT<sup>F</sup>VLE<sup>T</sup>KSIA<sup>V</sup>GN<sup>D</sup>VPLE<sup>N</sup>VI-----  
Cavefish Kank3 ---EPELKS<sup>S</sup>SEV<sup>V</sup>KEPP<sup>P</sup>MR<sup>V</sup>ERN<sup>S</sup>IA<sup>V</sup>GDD<sup>V</sup>PLEA<sup>V</sup>V<sup>C</sup>NR<sup>Q</sup>NV<sup>K</sup>D<sup>V</sup>SIE-----  
Herring Kank3 -GLPPLS<sup>P</sup>THGR<sup>S</sup>TRV<sup>S</sup>EL<sup>R</sup>KAIE<sup>K</sup>ASKE<sup>E</sup>GSQ<sup>Q</sup>Q<sup>Q</sup>Q<sup>Q</sup>Q<sup>Q</sup>TE<sup>K</sup>AV<sup>P</sup>AP<sup>V</sup>Q-----  
Stickleback Kank3 -TQTAE<sup>V</sup>LQTD<sup>P</sup>TRG<sup>Q</sup>PT<sup>P</sup>VS<sup>P</sup>GL<sup>K</sup>GL<sup>G</sup>KS<sup>G</sup>EL<sup>K</sup>RLTE<sup>R</sup>Q<sup>V</sup>KD<sup>A</sup>SE<sup>G</sup>T-----  
Fugu Kank3 ---VLVKA<sup>P</sup>EK<sup>V</sup>RE<sup>K</sup>KS<sup>V</sup>SV<sup>G</sup>ED<sup>V</sup>PM<sup>E</sup>SIV<sup>F</sup>Y<sup>S</sup>Q<sup>L</sup>KD<sup>A</sup>CE-----  
Tetradon Kank3 ---ETT<sup>K</sup>MH<sup>Q</sup>GTQ<sup>S</sup>RLT<sup>S</sup>PP<sup>S</sup>AV<sup>R</sup>GP<sup>K</sup>AEL<sup>G</sup>RLTE<sup>K</sup>FE<sup>G</sup>SR<sup>G</sup>RK<sup>D</sup>ACE<sup>G</sup>-----  
Medaka Kank3 ---TTE<sup>T</sup>QMD<sup>Q</sup>S<sup>L</sup>TSP<sup>T</sup>TGH<sup>K</sup>R<sup>F</sup>SK<sup>P</sup>GEL<sup>K</sup>WLTE<sup>K</sup>FE<sup>V</sup>KE<sup>Q</sup>KSP<sup>Q</sup>IIS-----  
Tilapia Kank3 ---EILQTE<sup>H</sup>SRLT<sup>S</sup>PT<sup>T</sup>GH<sup>K</sup>GV<sup>K</sup>S<sup>G</sup>EL<sup>K</sup>RLTE<sup>K</sup>DGV<sup>K</sup>DACE<sup>G</sup>TR<sup>V</sup>N-----  
Amazon molly Kank3 ---EILQSD<sup>Y</sup>SRV<sup>T</sup>SP<sup>N</sup>STGH<sup>K</sup>GL<sup>V</sup>KS<sup>G</sup>EL<sup>K</sup>RLA<sup>E</sup>KE<sup>F</sup>E<sup>G</sup>KEL<sup>K</sup>SPP<sup>P</sup>PL-----  
Platyfish Kank3 ---STQTTE<sup>L</sup>LQ<sup>F</sup>LPH<sup>L</sup>A<sup>E</sup>KE<sup>K</sup>KS<sup>V</sup>AV<sup>G</sup>DD<sup>V</sup>PM<sup>T</sup>SV<sup>V</sup>F<sup>Y</sup>HR<sup>N</sup>GV<sup>K</sup>D<sup>A</sup>SV<sup>C</sup>-----

1010 1020 1030 1040 1050 1060 1070 1080 1090 1100

Hydra -----  
Trichoplax -----  
Aplasia PSSLEERES<sup>R</sup>FS<sup>S</sup>SMV<sup>S</sup>ESS<sup>Q</sup>PH<sup>F</sup>TI<sup>K</sup>Q<sup>I</sup>QR<sup>N</sup>AP<sup>K</sup>AL<sup>T</sup>RS<sup>V</sup>GI<sup>D</sup>GN<sup>V</sup>FE<sup>G</sup>SG<sup>L</sup>HV<sup>H</sup>EKE<sup>F</sup>RT<sup>V</sup>FI<sup>G</sup>Q<sup>N</sup>DK<sup>V</sup>AK<sup>R</sup>NV<sup>G</sup>IE<sup>C</sup>RV<sup>P</sup>TR<sup>D</sup>V<sup>G</sup>S<sup>F</sup>MC<sup>D</sup>EE--  
Snail RTTSQES<sup>I</sup>DRE<sup>T</sup>RLP<sup>S</sup>SSQ<sup>L</sup>ES<sup>P</sup>RFT<sup>I</sup>NQ<sup>I</sup>QR<sup>S</sup>TP<sup>K</sup>AL<sup>R</sup>TL<sup>G</sup>V<sup>G</sup>EG<sup>N</sup>V<sup>F</sup>ED<sup>S</sup>GL<sup>H</sup>V<sup>H</sup>EKEL<sup>R</sup>TV<sup>I</sup>IG<sup>Q</sup>SGA<sup>V</sup>AK<sup>R</sup>NV<sup>G</sup>ID<sup>C</sup>RV<sup>P</sup>TR<sup>D</sup>V<sup>G</sup>S<sup>F</sup>MC<sup>D</sup>EE--  
Fruitfly -----  
Hookworm -----  
C.elegance ---ASAFE<sup>P</sup>V<sup>K</sup>PL<sup>S</sup>NG<sup>S</sup>PS<sup>P</sup>TH<sup>Q</sup>V<sup>Q</sup>K-----  
Tunicate ---L<sup>D</sup>L<sup>R</sup>G<sup>P</sup>PL<sup>P</sup>PK<sup>R</sup>K<sup>Y</sup>RS<sup>I</sup>AV<sup>G</sup>DS<sup>M</sup>PY<sup>Q</sup>D<sup>I</sup>VC<sup>Y</sup>SK<sup>N</sup>LI<sup>T</sup>HE<sup>V</sup>ES<sup>D</sup>C<sup>Q</sup>IL<sup>R</sup>Q<sup>T</sup>S-----  
Spider ---D<sup>I</sup>NS<sup>G</sup>VE<sup>K</sup>CK<sup>N</sup>M<sup>K</sup>SV<sup>G</sup>T<sup>S</sup>CS<sup>V</sup>LR<sup>D</sup>IG<sup>I</sup>GV-----

```

Lingula -----PMIKTMERKPITRSVGVGDGNVFEKDMQIQEKELRTIIIDKEAKKQTRNVGISVVRVPMRDVGVHYHCEAE--
Lancelet GVGISNDLLQQEELGIVENQKCN TAVVETSEVGVGVSV EQRAVAVGNHTELRDVGMTTDEEVVKKQKTKHATRSIGVIVDIPE TKDVRTVGVGNGSVSEHQ
Medaka Kank4b -----
Amazon molly Kank4b -----
Platyfish Kank4b -----
Stickleback Kank4b -----
Fugu Kank4b -----
Tetraon Kank4b -----
Cave fish Kank4b -----
Medaka Kank4a -----PFTTGTGRNLQGTKT-----
Fugu Kank4a -----ESSLPVGARKDASRI-----
Tetradon Kank4a -----
Stickleback Kank4a -----
Tilapia Kank4a -----
Platyfish Kank4a ALLKEQMEENKAKEDRILQLSEGM RVEICTTQVPVRSRRESIDAGTVTEKIDLSHQETETESPSKIDQGTDTDKILVEVIVP--
Amazon Molly Kank4a ALLKEQMEENKVKEDRILQLSEGM RVEICTTQVPERPRRESIDAGTVTERIDLSHQETETESPAKIDQGTDTDKILVEVIVP--
Herring Kank4 -----GVEQQDKKAESPTHEHFEEKI EPSEGVSKAAMP RVPLECTVSVVITEA-----
Zebrafish Kank4 -----KPVTDTESEKEQVPAPVSVPVILIDKAETPTDPEEEELQEP TLQEEASKSPSEQVKEQERSEILLEDKQPTLLEGIPASESE-----
Cave fish Kank4a -----VILIEKVESPTDSESEKQLEEFKHEA EIPELSEQLEKQEGTQDT-----
Mouse KANK4 -----
Rat KANK4 -----
Dog KANK4 -----
Human KANK4 -----
Eagle KANK4 -----
Chicken KANK4 -----
Goose KANK4 -----
Anole lizard KANK4 -----EDIELSICETEVL E-----
Turtle KANK4 -----
Aligator KANK4 -----
Frog Kank2 -----KKE TVENNSLP-----
Mouse KANK2 -----
Rat KANK2 -----
Dog KANK2 -----
Human KANK2 -----
Aligator KANK2 -----RELRSVAVGTEGG-----
Spotted gar Kank2 -----GGARQPAGGRKEVRSIGTEPEAGA-----
Cave fish Kank2 -----GGGRPGNRKEVRTICVGS DVAE-----
Herring Kank2 -----DSGCEIEDTVIVGGARPGARKEVRTICVGP EEKEGER-----
Zebrafish Kank2 -----VAGARPGAKREVRTICVGP EAE-----
Tetradon Kank2 -----
Fugu Kank2 -----
Medaka Kank2 -----
Stickleback Kank2 -----
Tilapia Kank2 -----
Amazon molly Kank2 -----VGGARPD AKREVRTICVGP EG-----
Platyfish Kank2 -----
Coelacanth KANK2 -----PKKEMRSISVGTGEEMMVRESRPS-----ASVGLGQ-----
Anole lizard KANK2 -----RKEVRSVGVGRSAEDREGNE-----
Turtle KANK2 -----
Tetradon Kank1b -----
Medaka Kank1b -----QVWHGKGPISVQ GKATKSVAVGTD TDMVPPKPSKVDKSVHTE-----
Amazon molly Kank1b -----LSWQDKGHGLLHENTTKTIGIKTDIDMKMTLSKN SKENKSVHTD-----
Platyfish Kank1b -----LSWQEKGHSLLHKNTTNSIGIKTDIDMKMASSKTSKENKSVHTD-----
Frog Kank4 -----
Zebrafish Kank1b -----ESSAFKMRDRESVDRGIDEAFCKDGTIGA-----
Tilapia Kank1b -----ESSAFKMRDRESVDRGIDEAFCKDGTIGA-----
Fugu Kank1b -----ESSAFKMRDRESVDRGIDEAFCKDGTIGA-----

```

|                     |                                                                      |              |
|---------------------|----------------------------------------------------------------------|--------------|
| Cavefish Kank1b     | -----AAHPVAKARALIRRSVTVGENKNCEDCRCTKSSFRDV-----                      |              |
| Spotted gar Kank4   | -----SKHLELNISENEMESSV-----                                          |              |
| Coelacanth KANK4    |                                                                      |              |
| Frog Kank1          | ESRCPDTPREIKTKEKCSRVAVGADENMNDIIYHKSVKSS                             | ODASVGT      |
| Shark Kank1         | EKPGGVEPCVKHLAKAREFRSVAVSTDVNMDFVIYHRSARF                            | KDVAVGT      |
| Coelacanth KANK1    | VPVTSGGFTQRTENPQKAKEYRSIAVGADENMNDIVYHRSRRC                          | KAIAVGT      |
| Mouse KANK1         | EVASELRENGQCPSRECKSVAVGSDENMNDVVYHRLRPC                              | KDTAVGT      |
| Rat KANK1           | EATPELRENGQCASREKRSVAVGSDENMNDIVYHRDFRSR                             | KDTAVGT      |
| Dog KANK1           | QPAPEGRSVAVGADTDMSVYVYRRAAGSR                                        | RDAVGT       |
| Human KANK1         | EASSELRENGEGRSVAVGAENMNDIVYHRGSRSC                                   | KDAVGT       |
| Anole lizard KANK1  | DNPASMRVNRASVMKENRSVAVGTDESMDNIVVYRNLRAF                             | RDI VGT      |
| Eagle KANK1         | ESPANLRVNRESLTKEARSVAVGADENMNDVVIYNRSARQH                            | KEVAVGT      |
| Chicken KANK1       | EVPSNLRRESLTKESSRSVAVGADENMNDVVIYNRSSRQH                             | REVAVGT      |
| Goose KANK1         | ETPSNLRANRESLTKESSRSVAVGADENMNDVVIYNRSRQR                            | REVAVGT      |
| Turtle KANK1        | EIPSNLRTNRENITKESKSVAVGADENMNDVVIYNRSSRPC                            | MEVAVGT      |
| Aligator KANK1      | EIPSNLRMNRDSLARESSRSVAVGADENMNDVVIYNRSSRQC                           | REVAVGT      |
| Spotted gar Kank1   | DTQFNLTQKAEQKQNAKEQKSI VAVGADENMNDVVIYRKSQKQY                        | RDVAVGT      |
| Herring Kank1       | KIQEPGAEKNRRQHSHQMNAAAPAPAATLQRQSSREQKSI VAVGADENMNDVVICRSPERS       | KDASVGT      |
| Zebrafish Kank1a    | EIKHSLHQTELRSNQNVQLWSRESRSIGVAVGADENMNDVVYRRSPGKN                    | KDVAVGT      |
| Cave fish Kank1a    | EPERGLNQMHNTNQNSLQSQWNRESKSI VAVGADENMNDVVIYRRLPGRN                  | KDVCI GT     |
| Stickleback Kank1a  | SQKSVGMVTDENMASLRADQRARGRS                                           | RDAVSTE      |
| Medaka Kank1a       | TDGTPPRSQCGAVGVATDKSAKDLDPQSTFRDVGVSTE                               |              |
| Fugu Kank1a         | NEVHSHKVLQNQAHQKSI GIVTDENMNNLPVPHGKLTNG                             | HCLR DAGVSTE |
| Tetradon Kank1a     | DEVHSQKLLQNQTHQKSV GIVTDENMNSLPVLHGKLTSG                             | LCFQ DAGVSTE |
| Tilapia Kank1a      | ENQPQNLTQNQAHQKSI GIVTDQNMNNLPATQRKPEKE                              | RCFQ DAGVSTE |
| Amazon molly Kank1a | AEVQPQNLPKQVLQKSI GIVTDENMNDLLGSLSKPKQD                              | SCLQDVG VSTE |
| Mouse KANK3         | EPRTRETGTEVVPETREVDQA VPETGEAGVEV                                    |              |
| Rat KANK3           | EPQTREAGTEVVPETREVDQA VPETREAGVEV                                    |              |
| Dog KANK3           | DARAQAEPETQ EAGVEA                                                   |              |
| Human KANK3         | TPQTR EVA AEAVPETREAGQA VPETREAGVEA                                  |              |
| Lamprey             |                                                                      |              |
| Coelacanth KANK3    | DIAYIAENQIKASERKTYMSVAVGEDINMNEAVFFYRSQRPC                           | KEVAVGS      |
| Frog Kank3          | GASKITSPPKVMERRSKSI VAVGEEMDMNDVVFFYRSQNTN                           | REVAVGC      |
| Turtle KANK3        | AARPAKAMEKACKSV GEGVNMNEAVFFYRSQKPC                                  | HEI VAGQ     |
| Aligator KANK3      | GTRPARPSDQACKSV GEGEMDMNDVVFFYRSQKLC                                 | REVAVGQ      |
| Eagle KANK3         | RSPRAAERLCRSVAVGEDRAMTDAVFFYRSQREGGDMPDGR                            |              |
| Chicken KANK3       | KGMAARPRAAERQCRSVAVGGEERAMSDAVFFYRSQEGGEAPE                          |              |
| Goose KANK3         |                                                                      |              |
| Spotted gar Kank3   | KGVGTDARETRDAGAEA                                                    |              |
| Zebrafish Kank3     | VSNRQTLKDAAVGSIIDVCHAAVETEANAMCEGIQT                                 |              |
| Cavefish Kank3      | ATVSVSHVGIETE VATMHD EEVQVG                                          |              |
| Herring Kank3       | MASLAVGEDLPMSAGFFYYRQDMKDAAVDVRCEVTDKGVGTAPAGSACDKGVQV               |              |
| Stickleback Kank3   | QVKVCDKSGMDAPLVQEEGVQV                                               |              |
| Fugu Kank3          | GTAVKVCEKGT RTEVPLLRDEGAQT                                           |              |
| Tetradon Kank3      | PAVKLWEKGTGTEVPVVRDQGAQT                                             |              |
| Medaka Kank3        | KLNPAAEKAVVQKKTVAVGDDVPMSSIVFYYSHNVIDATVGT E VTVSEKCTGT DAPLVQEQEIQA |              |
| Tilapia Kank3       | VCEKCTETE PPLVQEEGIQT                                                |              |
| Amazon molly Kank3  | SKVLPHSAEKESKSVAVGDDVPMTSVVFYHRNGVRDASVCTEVKVC DKTGT EAAAVVREQAIQV   |              |
| Platyfish Kank3     | MEVKVCDKTETE AAVVHEQAIQV                                             |              |

1110 1120 1130 1140 1150 1160 1170 1180 1190 1200

Hydra  
 Trichoplax  
 Aplasia  
 Snail  
 Fruitfly

Hookworm -----  
C.elegance -----  
Tunicate -----  
Spider -----  
Lingula -----  
Lancelet KPPVETVSVYTTNTFPVINTIDKVTNTVAVNLKTVAVGNFSVKDVLCDRCADVKTKTVAVGVCSIKDTICDRCNNMESKTVGVGRCTVNDTVCDKCSNLKTR  
Medaka Kank4b -----  
Amazon molly Kank4b -----  
Platyfish Kank4b -----  
Stickleback Kank4b -----  
Fugu Kank4b -----  
Tetraon Kank4b -----  
Cave fish Kank4b -----  
Medaka Kank4a -----  
Fugu Kank4a -----  
Tetradon Kank4a -----  
Stickleback Kank4a -----  
Tilapia Kank4a -----  
Platyfish Kank4a -----  
Amazon Molly Kank4a -----  
Herring Kank4 -----  
Zebrafish Kank4 -----  
Cave fish Kank4a -----  
Mouse KANK4 -----  
Rat KANK4 -----  
Dog KANK4 -----  
Human KANK4 -----  
Eagle KANK4 -----  
Chicken KANK4 -----  
Goose KANK4 -----  
Anole lizard KANK4 -----  
Turtle KANK4 -----  
Aligator KANK4 -----  
Frog Kank2 -----  
Mouse KANK2 -----  
Rat KANK2 -----  
Dog KANK2 -----  
Human KANK2 -----  
Aligator KANK2 -----  
Spotted gar Kank2 -----  
Cave fish Kank2 -----  
Herring Kank2 -----  
Zebrafish Kank2 -----  
Tetradon Kank2 -----  
Fugu Kank2 -----  
Medaka Kank2 -----  
Stickleback Kank2 -----  
Tilapia Kank2 -----  
Amazon molly Kank2 -----  
Platyfish Kank2 -----  
Coelacanth KANK2 -----  
Anole lizard KANK2 -----  
Turtle KANK2 -----  
Tetradon Kank1b -----  
Medaka Kank1b -----  
Amazon molly Kank1b -----  
Platyfish Kank1b -----

Frog Kank4  
 Zebrafish Kank1b  
 Tilapia Kank1b  
 Fugu Kank1b  
 Cavefish Kank1b  
 Spotted gar Kank4  
 Coelacanth KANK4  
 Frog Kank1  
 Shark Kank1  
 Coelacanth KANK1  
 Mouse KANK1  
 Rat KANK1  
 Dog KANK1  
 Human KANK1  
 Anole lizard KANK1  
 Eagle KANK1  
 Chicken KANK1  
 Goose KANK1  
 Turtle KANK1  
 Aligator KANK1  
 Spotted gar Kank1  
 Herring Kank1  
 Zebrafish Kank1a  
 Cave fish Kank1a  
 Stickleback Kank1a  
 Medaka Kank1a  
 Fugu Kank1a  
 Tetradon Kank1a  
 Tilapia Kank1a  
 Amazon molly Kank1a  
 Mouse KANK3  
 Rat KANK3  
 Dog KANK3  
 Human KANK3  
 Lamprey  
 Coelacanth KANK3  
 Frog Kank3  
 Turtle KANK3  
 Aligator KANK3  
 Eagle KANK3  
 Chicken KANK3  
 Goose KANK3  
 Spotted gar Kank3  
 Zebrafish Kank3  
 Cavefish Kank3  
 Herring Kank3  
 Stickleback Kank3  
 Fugu Kank3  
 Tetradon Kank3  
 Medaka Kank3  
 Tilapia Kank3  
 Amazon molly Kank3  
 Platyfish Kank3

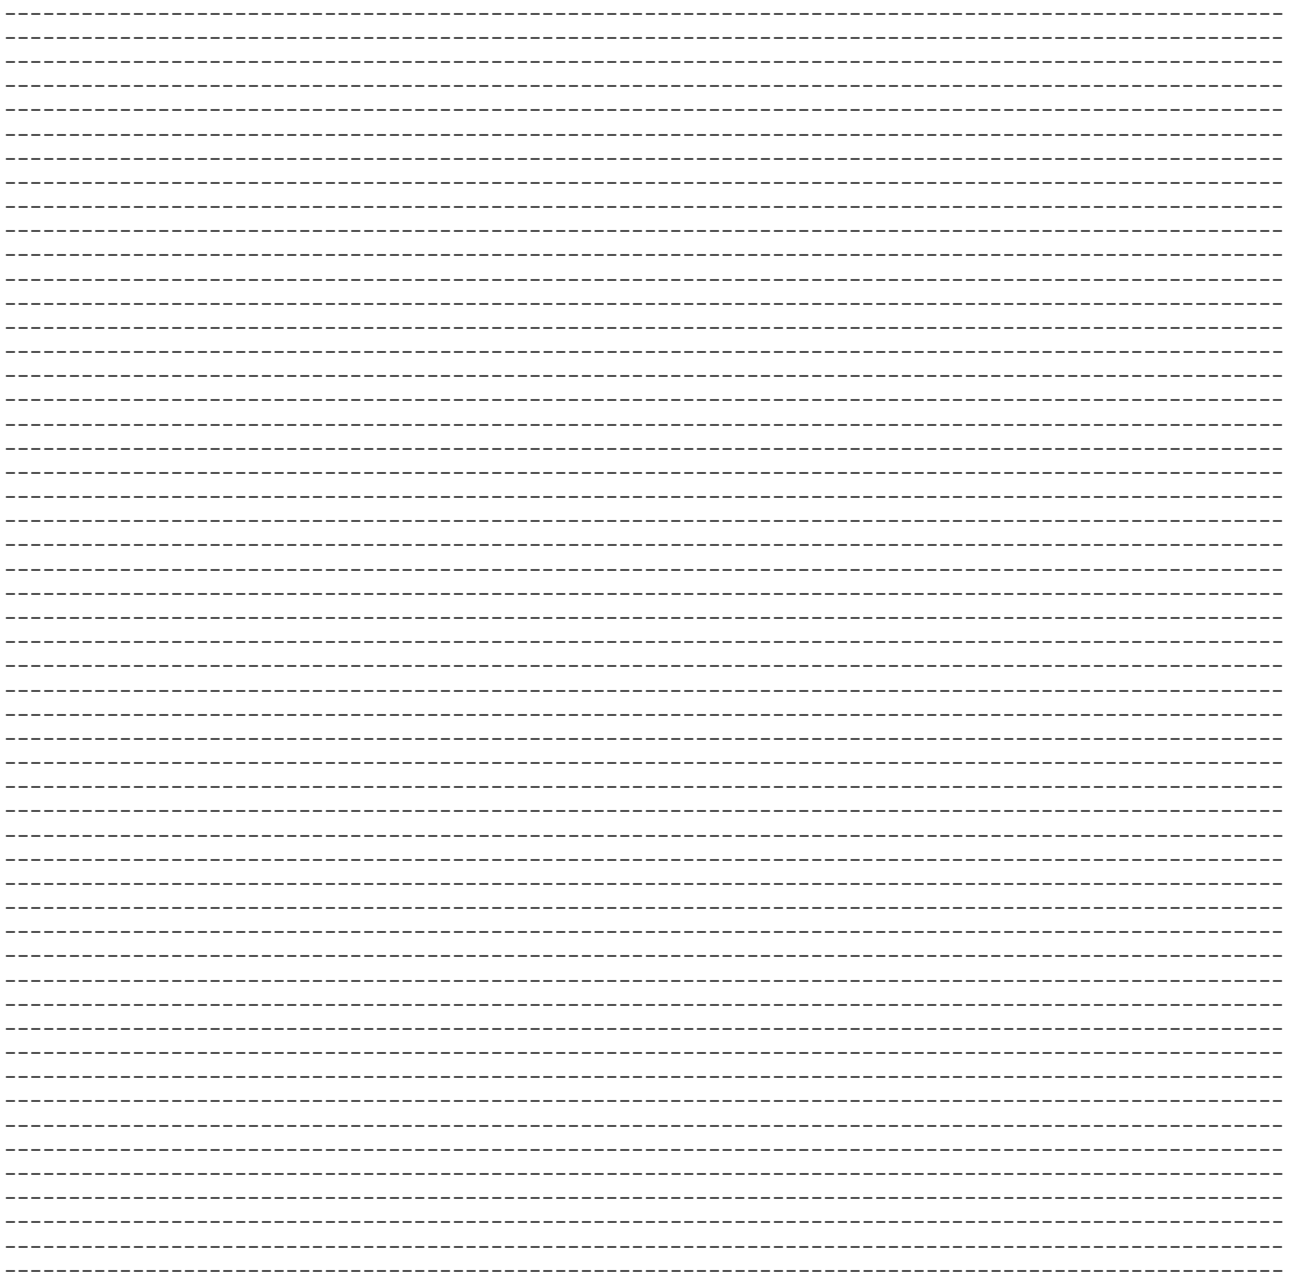

1210 1220 1230 1240 1250 1260 1270 1280 1290 1300

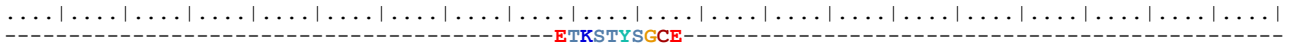

Hydra

|                     |                                                                                                      |
|---------------------|------------------------------------------------------------------------------------------------------|
| Trichoplax          | -----TNGRRDSNGN-----                                                                                 |
| Aplasia             | -----KPETRTIGVN-----                                                                                 |
| Snail               | -----KPATRTIGVN-----                                                                                 |
| Fruitfly            | -----PPATRDVSVGHQ-----                                                                               |
| Hookworm            | -----TAASSDVEC-----                                                                                  |
| C.elegance          | -----PIVTRSIAVS-----                                                                                 |
| Tunicate            | -----PPETVDFSGLVEPC-----                                                                             |
| Spider              | -----PNKSKSIGVGN-----                                                                                |
| Lingula             | -----KPSQRDVGVSVG-----                                                                               |
| Lancelet            | SIGCTTLANWNQKSVSVLAKVEQTDAGTGDDSVLEETVDSGKQETETKDIGVGEDSIFPLEEAKPPVLIQEEKTVNVVVFATAARPPLEIVESSSSDEVE |
| Medaka Kank4b       | -----DDNTQPMHEW-----                                                                                 |
| Amazon molly Kank4b | -----TSKINPANDW-----                                                                                 |
| Platyfish Kank4b    | -----TSKINPVNDW-----                                                                                 |
| Stickleback Kank4b  | -----                                                                                                |
| Fugu Kank4b         | -----ATHEW-----                                                                                      |
| Tetraon Kank4b      | -----EEAGRQIGSG-----                                                                                 |
| Cave fish Kank4b    | -----SRDNKDLSDH-----                                                                                 |
| Medaka Kank4a       | -----DKQKETFETHA-----                                                                                |
| Fugu Kank4a         | -----                                                                                                |
| Tetradon Kank4a     | -----RQDASRIHHA-----                                                                                 |
| Stickleback Kank4a  | -----ESTQDDAVQK-----                                                                                 |
| Tilapia Kank4a      | -----GELLSITVA-----                                                                                  |
| Platyfish Kank4a    | -----KPRARSIDRG-----                                                                                 |
| Amazon Molly Kank4a | -----KPRARLIDRG-----                                                                                 |
| Herring Kank4       | -----EEESEADLY-----                                                                                  |
| Zebrafish Kank4     | -----CTSTQEVMTT-----                                                                                 |
| Cave fish Kank4a    | -----SMEDKQLELS-----                                                                                 |
| Mouse KANK4         | -----EVDVRSIGIR-----                                                                                 |
| Rat KANK4           | -----EVDVRSVGVV-----                                                                                 |
| Dog KANK4           | -----EIDVRSIGIR-----                                                                                 |
| Human KANK4         | -----EVDMRSIGIR-----                                                                                 |
| Eagle KANK4         | -----KAEGGSVRAG-----                                                                                 |
| Chicken KANK4       | -----AQEKKEQGGD-----                                                                                 |
| Goose KANK4         | -----EDEERGGEAGE-----                                                                                |
| Anole lizard KANK4  | -----EGKVSSSGIR-----                                                                                 |
| Turtle KANK4        | -----KTEVRSVWAR-----                                                                                 |
| Aligator KANK4      | -----ENEDRNVWAR-----                                                                                 |
| Frog Kank2          | -----KRMCSVGVW-----                                                                                  |
| Mouse KANK2         | -----ALETRSVGTW-----                                                                                 |
| Rat KANK2           | -----VLETRSVGTW-----                                                                                 |
| Dog KANK2           | -----TLETRSVGTW-----                                                                                 |
| Human KANK2         | -----ALETRSVGTW-----                                                                                 |
| Aligator KANK2      | -----TSGQRSVGVG-----                                                                                 |
| Spotted gar Kank2   | -----KREVRHIGVE-----                                                                                 |
| Cave fish Kank2     | -----NKRTRQVGVG-----                                                                                 |
| Herring Kank2       | -----ERCYRQVGVG-----                                                                                 |
| Zebrafish Kank2     | -----ERGYRQVGVG-----                                                                                 |
| Tetradon Kank2      | -----PSRTRGVGVG-----                                                                                 |
| Fugu Kank2          | -----VRGSRQVGVG-----                                                                                 |
| Medaka Kank2        | -----TQNNCDVGVW-----                                                                                 |
| Stickleback Kank2   | -----PRGSRHVGVG-----                                                                                 |
| Tilapia Kank2       | -----TGKSRHVGVG-----                                                                                 |
| Amazon molly Kank2  | -----SRGSRDVGVG-----                                                                                 |
| Platyfish Kank2     | -----SRGSRDVGVG-----                                                                                 |
| Coelacanth KANK2    | -----TREVKEVGIS-----                                                                                 |
| Anole lizard KANK2  | -----ETERCDVGVA-----                                                                                 |
| Turtle KANK2        | -----VTSPRSVGVG-----                                                                                 |

|                     |                       |
|---------------------|-----------------------|
| Tetradon Kank1b     | -----KAEVRSVATE-----  |
| Medaka Kank1b       | -----QVETRSIATE-----  |
| Amazon molly Kank1b | -----RVETRSIATE-----  |
| Platyfish Kank1b    | -----QVETRSIATE-----  |
| Frog Kank4          | -----GGNDGDLGCTS----- |
| Zebrafish Kank1b    | -----KLETQSVAVG-----  |
| Tilapia Kank1b      | -----KLETQSVAVG-----  |
| Fugu Kank1b         | -----KLETQSVAVG-----  |
| Cavefish Kank1b     | -----AVEKRSTAVG-----  |
| Spotted gar Kank4   | -----SPSVQNVGVG-----  |
| Coelacanth KANK4    | -----RAEVGSTAVT-----  |
| Frog Kank1          | -----EIQVRNKGVC-----  |
| Shark Kank1         | -----VSEQRDVSVG-----  |
| Coelacanth KANK1    | -----AVEVRNAAVG-----  |
| Mouse KANK1         | -----VTETRNVGIS-----  |
| Rat KANK1           | -----VTETRNFGIS-----  |
| Dog KANK1           | -----ATEMRSCAIS-----  |
| Human KANK1         | -----LVEMRNCGVS-----  |
| Anole lizard KANK1  | -----ELVTKDFVAG-----  |
| Eagle KANK1         | -----EKEMRESGVC-----  |
| Chicken KANK1       | -----EKEMRESGVC-----  |
| Goose KANK1         | -----EKEMRESGVC-----  |
| Turtle KANK1        | -----ETETRD SGVG----- |
| Aligator KANK1      | -----EKQMRD SGVG----- |
| Spotted gar Kank1   | -----EVETRSTGVG-----  |
| Herring Kank1       | -----QRETRSAAVG-----  |
| Zebrafish Kank1a    | -----EQEVRSTGVG-----  |
| Cave fish Kank1a    | -----ENKTRSTGVG-----  |
| Stickleback Kank1a  | -----RRETRSAAVG-----  |
| Medaka Kank1a       | -----RLQTQSLSVG-----  |
| Fugu Kank1a         | -----RPDTRSVALA-----  |
| Tetradon Kank1a     | -----RPSSSVAVG-----   |
| Tilapia Kank1a      | -----QLEIRSTAVG-----  |
| Amazon molly Kank1a | -----RLETRSAGVV-----  |
| Mouse KANK3         | -----VPETVEVDTW-----  |
| Rat KANK3           | -----VPETVEVDTW-----  |
| Dog KANK3           | -----APETLESDAW-----  |
| Human KANK3         | -----APETVEADAW-----  |
| Lamprey             | -----EVARG-----       |
| Coelacanth KANK3    | -----EIETKNVGIW-----  |
| Frog Kank3          | -----ERETKDAEVW-----  |
| Turtle KANK3        | -----ETETKDAAVW-----  |
| Aligator KANK3      | -----ETETRDAAVW-----  |
| Eagle KANK3         | -----VRERRDAAVW-----  |
| Chicken KANK3       | -----GRERRDVAVW-----  |
| Goose KANK3         | -----                 |
| Spotted gar Kank3   | -----RAVEDASVW-----   |
| Zebrafish Kank3     | -----TVDTEDVSVW-----  |
| Cavefish Kank3      | -----PVQTEEVAVW-----  |
| Herring Kank3       | -----EPSTEEASVW-----  |
| Stickleback Kank3   | -----SAETAEAEVW-----  |
| Fugu Kank3          | -----SVDTADAEVW-----  |
| Tetradon Kank3      | -----RVDTTEAEVW-----  |
| Medaka Kank3        | -----QVKTEEVAVW-----  |
| Tilapia Kank3       | -----RVETEEAEVW-----  |
| Amazon molly Kank3  | -----RAGTKEAEVW-----  |
| Platyfish Kank3     | -----RAGTKEAEVW-----  |





|                     |                                    |
|---------------------|------------------------------------|
| Platyfish Kank2     | -----VREKDLGLRP-----               |
| Coelacanth KANK2    | -----VKEHDLGLSSV---ATQAEVEHQ-----  |
| Anole lizard KANK2  | -----VKEEELGLPS-----PEEERQ-----    |
| Turtle KANK2        | -----VSEELAPEGQ-----               |
| Tetradon Kank1b     | -----VSEIHLGIYT---EREAEIDAQ-----   |
| Medaka Kank1b       | -----VSEVNLGIYA---EQEAELIAQ-----   |
| Amazon molly Kank1b | -----VTEVSLGIHT---KHEAELEAQ-----   |
| Platyfish Kank1b    | -----VTEVSLGIHT---KHEAELEAQ-----   |
| Frog Kank4          | -----VSHSIFLAIKQQITFEFIEHFDDS----- |
| Zebrafish Kank1b    | -----VTETMLGVLS-----DKDEMQ-----    |
| Tilapia Kank1b      | -----VTETMLGVLS-----DKDEMQ-----    |
| Fugu Kank1b         | -----VTETMLGVLS-----DKDEMQ-----    |
| Cavefish Kank1b     | -----VTEAMLGIVP---DSELELEMQ-----   |
| Spotted gar Kank4   | -----VTEKDLGLTS---EQVSSDTG-----    |
| Coelacanth KANK4    | -----NTENELCLESSTLTE-----          |
| Frog Kank1          | -----VTEEMLGVTS---EAEREIELQ-----   |
| Shark Kank1         | -----VTEALLGVST---EADQEIELQ-----   |
| Coelacanth KANK1    | -----VTEILLGVTT---EADREIELQ-----   |
| Mouse KANK1         | -----VTEAMLGVIT---EADKEIELQ-----   |
| Rat KANK1           | -----VTEAMLGVIT---EADKEIELQ-----   |
| Dog KANK1           | -----VTEAMLGVTT---EADKEIELQ-----   |
| Human KANK1         | -----VTEAMLGMT---EADKEIELQ-----    |
| Anole lizard KANK1  | -----VTEGMLGLST---EAEREIDLQ-----   |
| Eagle KANK1         | -----VTEAMLGLST---EVEKEIELQ-----   |
| Chicken KANK1       | -----VTEAMLGLST---EVEKEIELQ-----   |
| Goose KANK1         | -----VTEAMLGLST---EVEKEIELQ-----   |
| Turtle KANK1        | -----VTEVMLGITT---EAEKEIELQ-----   |
| Aligator KANK1      | -----VTEGMLGVTT---EAEKEIELQ-----   |
| Spotted gar Kank1   | -----VTEALLGVST---EAETEIEMQ-----   |
| Herring Kank1       | -----VTEAMLGMT---EAEAEIELQ-----    |
| Zebrafish Kank1a    | -----VTEAMLGLSS---EAETEIEMQ-----   |
| Cave fish Kank1a    | -----VTEAMLGMT---EAEAEIELQ-----    |
| Stickleback Kank1a  | -----VTEAMLGTSS---EAEREMELQ-----   |
| Medaka Kank1a       | -----VTEAMLGVTS---EAEKEIELQ-----   |
| Fugu Kank1a         | -----VTEAMLGVTS---EAEKEVELQ-----   |
| Tetradon Kank1a     | -----VTEAMLGVTS---EAEKEIELQ-----   |
| Tilapia Kank1a      | -----VTEAMLGMSS---EAEKEIELQ-----   |
| Amazon molly Kank1a | -----VTEAMLGVTS---EADKEIELQ-----   |
| Mouse KANK3         | -----VTEELLGLPE---AAERELELL-----   |
| Rat KANK3           | -----VTEALLGLPE---AAERELELL-----   |
| Dog KANK3           | -----VTEALLGLPE---AAERELELL-----   |
| Human KANK3         | -----VTEALLGLPA---AAERELELL-----   |
| Lamprey             | -----                              |
| Coelacanth KANK3    | -----VMESLLGVTS---DAEKEMELL-----   |
| Frog Kank3          | -----VIESLLGMTC---EAEKEIELL-----   |
| Turtle KANK3        | -----VVESLLGLPT---EAEKEMELL-----   |
| Aligator KANK3      | -----VMESLLGLST---ESEKEIELL-----   |
| Eagle KANK3         | -----VLESSLGLTS---EAERELELL-----   |
| Chicken KANK3       | -----VLESSLGLAS---ETETELELL-----   |
| Goose KANK3         | -----                              |
| Spotted gar Kank3   | -----VMESLLGLRT---EAEREIETL-----   |
| Zebrafish Kank3     | -----VIESFLGLQS---EAEREIDNL-----   |
| Cavefish Kank3      | -----VMESLLGLSS---ETEQEISNL-----   |
| Herring Kank3       | -----VMESLLGLTS---ETEREIDTL-----   |
| Stickleback Kank3   | -----VIESLLGLTG---EAQREIDTL-----   |
| Fugu Kank3          | -----VMESLLG-----                  |
| Tetradon Kank3      | -----VMESLLGVTS---EAQREMDAL-----   |

Medaka Kank3  
Tilapia Kank3  
Amazon molly Kank3  
Platyfish Kank3

-----VVESLLGLST--DAQREIGAL-----  
-----VMESLLGLTT--EAQREIDTL-----  
-----VMESLLGLTT--EAQREIDTL-----  
-----VMESLLGLTT--EAQREIDTL-----

1410 1420 1430 1440 1450 1460 1470 1480 1490 1500

Hydra  
Trichoplax  
Aplasia  
Snail  
Fruitfly  
Hookworm  
C.elegance  
Tunicate  
Spider  
Lingula  
Lancelet  
Medaka Kank4b  
Amazon molly Kank4b  
Platyfish Kank4b  
Stickleback Kank4b  
Fugu Kank4b  
Tetraon Kank4b  
Cave fish Kank4b  
Medaka Kank4a  
Fugu Kank4a  
Tetradon Kank4a  
Stickleback Kank4a  
Tilapia Kank4a  
Platyfish Kank4a  
Amazon Molly Kank4a  
Herring Kank4  
Zebrafish Kank4  
Cave fish Kank4a  
Mouse KANK4  
Rat KANK4  
Dog KANK4  
Human KANK4  
Eagle KANK4  
Chicken KANK4  
Goose KANK4  
Anole lizard KANK4  
Turtle KANK4  
Aligator KANK4  
Frog Kank2  
Mouse KANK2  
Rat KANK2  
Dog KANK2  
Human KANK2  
Aligator KANK2  
Spotted gar Kank2  
Cave fish Kank2  
Herring Kank2  
Zebrafish Kank2  
Tetradon Kank2  
Fugu Kank2

-----CSIFDVFCDRCS-----  
-----QSNNSNKINQDE-----  
-----LRGVLQRNVRVSV-----  
-----LRGVLQRSVHVS-----  
-----SETVYSKEELDK-----  
-----NVESTIASDDV-----  
-----CGECAGLRKELF-----  
-----GSETNSIETINS-----  
-----SISSESLSDSE-----  
-----QLQHISAPEIRN-----  
LKCKHSTKKVNIKKEIQFVGVNGHDESSDDSSSEESSEDETDDEDSSSESESSDEGGYNCELGKVIKCKEDQCKDVKTISSSEIICEDIKETDR  
-----LLTVTSLQAKVA-----  
-----LLTVTSLQAKVA-----  
-----LLTVTSLQAKVA-----  
-----LLTVTSLQAKVA-----  
-----LLTVTSLQAKVA-----  
-----KSLTETLQRKVV-----  
-----TCNTKKLQEKLM-----  
-----EDSKQKLEKLS-----  
-----EDSKQKLEKLS-----  
-----TSKIQLQEKLM-----  
-----PDDMQKLEKLT-----  
-----VIVAIQPRPRAN-----  
-----VIEAIQPRPRAN-----  
-----SLVVQTLQAKLQ-----  
-----LVSNLELEAKLK-----  
-----SLAIQELQVKIK-----  
-----TSSISSLKNQVL-----  
-----TSSISSLKSQVL-----  
-----PGSISSLKQQLS-----  
-----PGSISSLKQQVS-----  
-----PGGVAALKQOVA-----  
-----PGGIAALKQHIA-----  
-----PGGIAALKQOIA-----  
-----PSNIIALKQHIA-----  
-----PSRITALKQQIT-----  
-----PSTVTALKLQIA-----  
-----KMLVQALSAKIA-----  
-----PDGEAALVAKVA-----  
-----PDGEAALVAKVA-----  
-----PDGEAALVAKVA-----  
-----PDGEAALAAKVA-----  
-----GDTVRALSARVA-----  
-----QSESEAWKTKAS-----  
-----ETAALKTKVE-----  
-----ETESLKTQVS-----  
-----ETEALKTKVG-----  
-----ETEVLKSQVG-----  
-----ETEVLKSQVG-----

|                     |                                                                        |
|---------------------|------------------------------------------------------------------------|
| Medaka Kank2        | -----E <b>T</b> E <b>A</b> L <b>R</b> D <b>Q</b> V <b>G</b>            |
| Stickleback Kank2   | -----E <b>T</b> K <b>A</b> L <b>R</b> N <b>Q</b> V <b>G</b>            |
| Tilapia Kank2       | -----E <b>T</b> E <b>V</b> L <b>K</b> N <b>Q</b> V <b>G</b>            |
| Amazon molly Kank2  | -----E <b>A</b> E <b>V</b> L <b>K</b> D <b>Q</b> V <b>G</b>            |
| Platyfish Kank2     | -----E <b>A</b> E <b>V</b> L <b>K</b> D <b>Q</b> V <b>G</b>            |
| Coelacanth KANK2    | -----R <b>Q</b> T <b>I</b> E <b>A</b> L <b>A</b> A <b>K</b> I <b>S</b> |
| Anole lizard KANK2  | -----R <b>Q</b> A <b>V</b> <b>Q</b> V <b>L</b> S <b>T</b> K <b>I</b> A |
| Turtle KANK2        | -----R <b>Q</b> A <b>A</b> L <b>A</b> L <b>S</b> A <b>K</b> V <b>A</b> |
| Tetradon Kank1b     | -----Q <b>L</b> I <b>I</b> G <b>A</b> L <b>K</b> D <b>R</b> I <b>S</b> |
| Medaka Kank1b       | -----Q <b>L</b> L <b>N</b> G <b>A</b> L <b>K</b> E <b>R</b> I <b>C</b> |
| Amazon molly Kank1b | -----Q <b>L</b> L <b>N</b> A <b>A</b> L <b>K</b> E <b>R</b> I <b>S</b> |
| Platyfish Kank1b    | -----Q <b>L</b> L <b>N</b> A <b>A</b> L <b>K</b> E <b>R</b> I <b>S</b> |
| Frog Kank4          | -----T <b>R</b> D <b>C</b> H <b>N</b> L <b>R</b> E <b>I</b> L <b>E</b> |
| Zebrafish Kank1b    | -----Q <b>Q</b> T <b>I</b> Q <b>N</b> L <b>T</b> Y <b>Q</b> V <b>Q</b> |
| Tilapia Kank1b      | -----Q <b>Q</b> T <b>I</b> Q <b>N</b> L <b>T</b> Y <b>Q</b> V <b>Q</b> |
| Fugu Kank1b         | -----Q <b>Q</b> T <b>I</b> Q <b>N</b> L <b>T</b> Y <b>Q</b> V <b>Q</b> |
| Cavefish Kank1b     | -----Q <b>Q</b> T <b>I</b> H <b>V</b> L <b>S</b> D <b>R</b> V <b>Q</b> |
| Spotted gar Kank4   | -----P <b>L</b> T <b>I</b> I <b>A</b> L <b>R</b> T <b>K</b> L <b>T</b> |
| Coelacanth KANK4    | -----P <b>F</b> T <b>V</b> I <b>T</b> L <b>K</b> A <b>K</b> I <b>T</b> |
| Frog Kank1          | -----Q <b>Q</b> T <b>I</b> E <b>A</b> L <b>K</b> D <b>K</b> I <b>Y</b> |
| Shark Kank1         | -----Q <b>Q</b> T <b>I</b> D <b>A</b> L <b>K</b> D <b>K</b> V <b>Y</b> |
| Coelacanth KANK1    | -----Q <b>Q</b> T <b>I</b> D <b>S</b> L <b>K</b> E <b>K</b> I <b>Y</b> |
| Mouse KANK1         | -----Q <b>Q</b> T <b>I</b> E <b>A</b> L <b>K</b> E <b>K</b> I <b>Y</b> |
| Rat KANK1           | -----Q <b>Q</b> T <b>I</b> E <b>A</b> L <b>K</b> E <b>K</b> I <b>Y</b> |
| Dog KANK1           | -----Q <b>Q</b> T <b>I</b> E <b>A</b> L <b>K</b> E <b>K</b> I <b>Y</b> |
| Human KANK1         | -----Q <b>Q</b> T <b>I</b> E <b>S</b> L <b>K</b> E <b>K</b> I <b>Y</b> |
| Anole lizard KANK1  | -----H <b>Q</b> T <b>I</b> E <b>A</b> L <b>K</b> D <b>K</b> I <b>Y</b> |
| Eagle KANK1         | -----Q <b>Q</b> T <b>I</b> E <b>A</b> L <b>K</b> E <b>K</b> I <b>Y</b> |
| Chicken KANK1       | -----Q <b>Q</b> T <b>I</b> E <b>A</b> L <b>K</b> E <b>K</b> I <b>Y</b> |
| Goose KANK1         | -----Q <b>Q</b> T <b>I</b> E <b>A</b> L <b>K</b> E <b>K</b> I <b>Y</b> |
| Turtle KANK1        | -----Q <b>Q</b> T <b>I</b> E <b>A</b> L <b>K</b> G <b>K</b> I <b>Y</b> |
| Aligator KANK1      | -----Q <b>Q</b> T <b>I</b> E <b>A</b> L <b>K</b> E <b>K</b> I <b>Y</b> |
| Spotted gar Kank1   | -----H <b>Q</b> A <b>I</b> D <b>A</b> L <b>K</b> D <b>K</b> I <b>Y</b> |
| Herring Kank1       | -----H <b>Q</b> T <b>I</b> E <b>T</b> L <b>K</b> E <b>K</b> I <b>Y</b> |
| Zebrafish Kank1a    | -----H <b>Q</b> T <b>I</b> E <b>A</b> L <b>K</b> E <b>K</b> I <b>Y</b> |
| Cave fish Kank1a    | -----H <b>Q</b> T <b>I</b> E <b>S</b> L <b>K</b> E <b>K</b> I <b>Y</b> |
| Stickleback Kank1a  | -----Q <b>Q</b> T <b>I</b> E <b>S</b> L <b>K</b> E <b>K</b> I <b>Y</b> |
| Medaka Kank1a       | -----Q <b>Q</b> T <b>I</b> D <b>A</b> L <b>K</b> D <b>K</b> I <b>Y</b> |
| Fugu Kank1a         | -----H <b>Q</b> A <b>I</b> E <b>A</b> L <b>K</b> E <b>K</b> I <b>Y</b> |
| Tetradon Kank1a     | -----H <b>Q</b> A <b>I</b> E <b>A</b> L <b>K</b> D <b>K</b> I <b>Y</b> |
| Tilapia Kank1a      | -----Q <b>Q</b> T <b>I</b> D <b>S</b> L <b>K</b> E <b>K</b> I <b>Y</b> |
| Amazon molly Kank1a | -----Q <b>Q</b> T <b>I</b> E <b>A</b> L <b>K</b> E <b>K</b> I <b>Y</b> |
| Mouse KANK3         | -----R <b>T</b> S <b>L</b> E <b>H</b> Q <b>R</b> G <b>V</b> S <b>E</b> |
| Rat KANK3           | -----R <b>T</b> S <b>L</b> E <b>H</b> Q <b>R</b> G <b>V</b> S <b>E</b> |
| Dog KANK3           | -----R <b>A</b> S <b>L</b> E <b>H</b> Q <b>R</b> G <b>V</b> S <b>E</b> |
| Human KANK3         | -----R <b>A</b> S <b>L</b> E <b>H</b> Q <b>R</b> G <b>V</b> S <b>E</b> |
| Lamprey             | -----A <b>E</b> L <b>S</b> R <b>Y</b> I <b>E</b>                       |
| Coelacanth KANK3    | -----Q <b>H</b> T <b>I</b> N <b>H</b> Q <b>K</b> E <b>A</b> I <b>C</b> |
| Frog Kank3          | -----Q <b>H</b> T <b>V</b> D <b>H</b> Q <b>R</b> G <b>V</b> I <b>G</b> |
| Turtle KANK3        | -----Q <b>H</b> T <b>I</b> G <b>H</b> Q <b>R</b> E <b>V</b> I <b>A</b> |
| Aligator KANK3      | -----Q <b>H</b> T <b>V</b> S <b>H</b> Q <b>K</b> E <b>V</b> I <b>N</b> |
| Eagle KANK3         | -----Q <b>Q</b> T <b>V</b> G <b>H</b> Q <b>K</b> E <b>V</b> I <b>A</b> |
| Chicken KANK3       | -----Q <b>Q</b> T <b>V</b> G <b>H</b> Q <b>K</b> D <b>V</b> I <b>A</b> |
| Goose KANK3         | -----                                                                  |
| Spotted gar Kank3   | -----Q <b>D</b> T <b>I</b> K <b>F</b> Q <b>Q</b> E <b>T</b> I <b>Q</b> |
| Zebrafish Kank3     | -----Q <b>H</b> T <b>I</b> T <b>F</b> Q <b>Q</b> E <b>S</b> I <b>Q</b> |
| Cavefish Kank3      | -----Q <b>Q</b> T <b>I</b> T <b>L</b> Q <b>Q</b> E <b>S</b> I <b>Q</b> |

Herring Kank3 -----QDTVKLQQESIR  
 Stickleback Kank3 -----QDTIKFQQESIV  
 Fugu Kank3 -----QESIA  
 Tetradon Kank3 -----QDTRVFQQESIV  
 Medaka Kank3 -----QDTVKLQQESIA  
 Tilapia Kank3 -----QDTIKFQQESIV  
 Amazon molly Kank3 -----QDTIKFQQESIV  
 Platyfish Kank3 -----QDTIKFQQESIV

1510 1520 1530 1540 1550 1560 1570 1580 1590 1600

Hydra NLNLQNV--GVGEYVNNL-----LCCVDDKICG-----  
 Trichoplax VLNERTH--RHSLSKEPSIDIPNADEHIM-----  
 Aplasia ATNCNFKVPTVDCGYMDL-----KTGISVCGCGDEEHRDVEIR-----  
 Snail GTNCNFKVTTIDAATLTET-----GSGVSVGCGDEEMRIDVEVR-----  
 Fruitfly KVEQALT--NAQKQQLRRL-----ISVGTQMYVQPRDQKDSGVQ-----  
 Hookworm IGDTPVP--ECARCQRE-----ETFTRNVGVGACAVSDKVCI-----  
 C.elegance LAVEKIPPPPEPESCHVSTS-----TVLLEFADQSVGSEPIKHCH-----  
 Tunicate YSQTKNELNTSATQTISPL-----TRTIGTGEHAFNAMVDKSCG-----  
 Spider SLNGSFD--HSRLFLQQ-----RNLKSLTTSPIKTDSPNVVL-----  
 Lingula IISTMLHRDVASKSTMTDVSFKSGVDKEVLTDKVHTVDEASSDITI-----  
 Lancelet LVSRLEKETHELSEELQEA-----CGVLEKHVTTPKSVPPREIMMAMNTIQHEWMKAGAQKTSDVQVVRDYLAAFEQMATGVLGKIVNLADGNGNTAL  
 Medaka Kank4b ALEQKLH--ETSLELQKV-----TGLLREQQAESGTKDKKIEN-----  
 Amazon molly Kank4b ALEQKLH--DTEQDLQRT-----AGLLKEQQQESRRKDEKIEY-----  
 Platyfish Kank4b ALEQKLH--DTEQDLQRT-----VGLLKEQQQESRRKDEKIEY-----  
 Stickleback Kank4b -----  
 Fugu Kank4b ALEQKLH--ETDLELQRA-----LAQLREQKESREPGVKIEDL-----  
 Tetraon Kank4b -----  
 Cave fish Kank4b TLEQKLH--ELESDDLKT-----RDQLKQQVLESRIKDERIKE-----  
 Medaka Kank4a TLEAKLT--QASQELERT-----NNLLKQIQENKTKEERILQ-----  
 Fugu Kank4a TLEAKLA--QASQELDRT-----TGLLKEQLQENKLKEEKILQ-----  
 Tetradon Kank4a TLEAKLA--RATQELDRT-----SVLLKEQLQENKLKEEKILQ-----  
 Stickleback Kank4a ILEAKLT--QASQDLERT-----NTLLKEQMDENKVKEERILQ-----  
 Tilapia Kank4a ILEAKLI--KASQELERT-----NSLLKQQVEENKLKEERILQ-----  
 Platyfish Kank4a SMERGTITENIVTQDQTETPAAERVNQVTEETEGETVTDHPQRPRFA  
 Amazon Molly Kank4a SMERGTITESIVTQDQTETPAAERVNQVTEETEGETVTDHPQRPRFA  
 Herring Kank4 ALEEKLN--LSSLELKT-----NALLREQVEENRVKDERIQE-----  
 Zebrafish Kank4 TLEESLS--KASCELEKT-----NVLLREEMDKNRQKDERIQE-----  
 Cave fish Kank4a TLEESLS--QASCELEKT-----NSLLREQIEENKDKDLTIQE-----  
 Mouse KANK4 ALEDKLS--GRTEELARV-----RAALEQQEETKAREQRIQE-----  
 Rat KANK4 DLEDKLS--GRTEELAQV-----RAALEQQEETKAREQRIQE-----  
 Dog KANK4 ALEGELS--GRTEELAQV-----RAALQQQEESKARGQRIQE-----  
 Human KANK4 ALEGELS--GRTEELAQV-----RTALQQQEETKAREQRIQE-----  
 Eagle KANK4 ALEEQLG--KKKEELERI-----KAVLEQQDHEIKEKEKSIKL-----  
 Chicken KANK4 ALEEQLD--RKKEELEQI-----RAVLKQQDHEIKEKEKSIQL-----  
 Goose KANK4 TLEEQLS--KKKEELEQI-----RAVLEQQDHEIKEKEKSIKL-----  
 Anole lizard KANK4 ILEEQLN--NKTEELAQI-----RVVLKEQDKEIKAKEKSIEM-----  
 Turtle KANK4 VLEEQLN--SKTEELEQI-----KVVLLKQQDSEIKAKERSIKI-----  
 Alligator KANK4 VLEEQLS--TKTQELEHV-----RLVLLKQQDDEIKEKERNIKT-----  
 Frog Kank2 VLEKQLG--RALIEVQNA-----NRKLEEAERAGRAEAAKRE-----  
 Mouse KANK2 VLETQLK--KALQELRAA-----QTQQVDLQPQAWPPPDQVVR-----  
 Rat KANK2 VLETQLK--KALQELRAA-----QTQQVDLQPQAWPPPDQVVR-----  
 Dog KANK2 VLETQLK--KALQELQAA-----QARQADPQPQPQPQPQPRPP-----  
 Human KANK2 VLETQLK--KALQELQAA-----QARQADPQPQAWPPPDSPVR-----  
 Alligator KANK2 LLEERLQ--KALGELQDA-----RQRLGGGAG-----  
 Spotted gar Kank2 LLETQLR--KTLQELHTA-----HRKLEALGKETAEKGQDAKP-----  
 Cave fish Kank2 ELEEVQLK--RTVQELQSA-----QKQVETVQKERTSGAGPP-----

|                     |          |              |        |                       |                     |
|---------------------|----------|--------------|--------|-----------------------|---------------------|
| Herring Kank2       | RLEAQLK  | --RAMQEIQSS  | -----  | QEQVETAQRERERQAQLQRQ  | -----               |
| Zebrafish Kank2     | LLEVQLR  | --KTMQELQSA  | -----  | QQQVEAAQKERQTVCP      | -----               |
| Tetradon Kank2      | QLEGQLR  | --RTMQELQAA  | -----  | QQQVTAVQKGPRAE        | -----               |
| Fugu Kank2          | QLEGELK  | --RTMQELQAV  | -----  | QQQVTAVQNP            | -----               |
| Medaka Kank2        | QLEGKLK  | -----        | -----  | RTLEELQTAQQQSATVQETL  | -----               |
| Stickleback Kank2   | QLEGQLK  | -----        | -----  | RTVQELRDAQKAPQADRFVM  | -----               |
| Tilapia Kank2       | QLEGQLK  | --RTMQELQAA  | -----  | QQQVATVQKAP           | -----               |
| Amazon molly Kank2  | QLEGKLK  | --RTLQELQAA  | -----  | QLQKAP                | -----               |
| Platyfish Kank2     | QLEGKLT  | --RTLQELQAA  | -----  | QLQKAPQAEHPPOQREQRTVG | -----               |
| Coelacanth KANK2    | VLEKQLK  | --KALQELQVA  | -----  | HQKLEQQAKEITEREKATKP  | -----               |
| Anole lizard KANK2  | VLETQLK  | -----        | RALQEL | --QAAHQKLEHQSRQEDKEMS | -----               |
| Turtle KANK2        | VLEKQLQ  | --KALRELQGA  | -----  | QQKLAGRPGWQQQEVVKAD   | -----               |
| Tetradon Kank1b     | HLEAELK  | -ESALQAEMSRL | -----  | KSELKAAG--VRTRADKSSH  | -----               |
| Medaka Kank1b       | HLEAELK  | -ESAFQIELTRL | -----  | KLELHVAG--ARNRADKACL  | -----               |
| Amazon molly Kank1b | QLETELK  | -ESALQTELTR  | -----  | KLELQAAG--ARNRVDKSCF  | -----               |
| Platyfish Kank1b    | QLETELR  | -ESALQTELTR  | -----  | KLELQAAG--ARNRVDKSCF  | -----               |
| Frog Kank4          | RQKEEMN  | --AKDLHIIEI  | -----  | KNTIDTLEEMIRTRQKDDV   | -----               |
| Zebrafish Kank1b    | ILEAELK  | -EAMLKSEMGRM | -----  | RSELREAEARNRTYKSSTAQ  | -----               |
| Tilapia Kank1b      | ILEAELK  | -EAMLKSEMGRM | -----  | RSELREAEARNRTYKSSTAQ  | -----               |
| Fugu Kank1b         | ILEAELK  | -EAMLKSEMGRM | -----  | RSELREAEARNRTYKSSTAQ  | -----               |
| Cavefish Kank1b     | TLEAELK  | -EALLNAEMCR  | -----  | KDELREAGSHNRADKSSSAQ  | -----               |
| Spotted gar Kank4   | VVEKQLN  | --DTKELDKV   | -----  | NSLLKQMKENVRKEERIKI   | -----               |
| Coelacanth KANK4    | VLENQLN  | --DARKELEKN  | -----  | SDTHKQNEEHKAKNINPHQ   | -----               |
| Frog Kank1          | RLETDLR  | -ETTYAMEMTKL | -----  | KLEIKAAG--SRKNADKAIM  | -----               |
| Shark Kank1         | RLEAQVK  | -ETMHQAEMSKL | -----  | KFELQAAG--SWKKADKCVT  | -----               |
| Coelacanth KANK1    | RLEVQLK  | -ETTHDREMTKL | -----  | KLELQAAG--SRKKDKGLM   | -----               |
| Mouse KANK1         | RLEVQLK  | -ETTHDREMTKL | -----  | KQELQAAG--SRKKVDKATM  | -----               |
| Rat KANK1           | RLEVQLK  | -ETTHDREMTKL | -----  | KQELQAAG--SRKKVDKAIM  | -----               |
| Dog KANK1           | RLEVQLK  | -ETTHDREMTKL | -----  | KQELQAAG--SRKKVDKAVM  | -----               |
| Human KANK1         | RLEVQLR  | -ETTHDREMTKL | -----  | KQELQAAG--SRKKVDKATM  | -----               |
| Anole lizard KANK1  | RLEVQLR  | -ETTHDREMTKL | -----  | KHELQAAG--SRKKLDKALM  | -----               |
| Eagle KANK1         | RLEVQLK  | -ETTHDREMTKL | -----  | KQELQAAG--SRKKLDKAVM  | -----               |
| Chicken KANK1       | RLEVQLK  | -ETTHDREMTKL | -----  | KQELQAAG--SRKKVDKAMM  | -----               |
| Goose KANK1         | RLEVQLK  | -ETTHDREMTKL | -----  | KQELQAAG--SRKKVDKATM  | -----               |
| Turtle KANK1        | RLEVQLK  | -ETTHDREMTKL | -----  | KQELQAAG--SRKKVDKALM  | -----               |
| Aligator KANK1      | RLEVQLK  | -ETTHDREMTKL | -----  | KQELQAAG--SRKKLDKAVM  | -----               |
| Spotted gar Kank1   | RLEVQLK  | -ETTHEMEMGKL | -----  | KLELQAAG--SRKKADKGS   | -----               |
| Herring Kank1       | RLEVQLK  | -ETTHQMEMCKL | -----  | KLELQAAG--NRKSKDKACM  | -----               |
| Zebrafish Kank1a    | RLEVQLK  | -ETTHQMEMGKL | -----  | KLQLQVAG--SRKKADKGLM  | -----               |
| Cave fish Kank1a    | RLEVQLK  | -ETTHEMEMGKL | -----  | KLELQVAG--SRKKVDKGS   | -----               |
| Stickleback Kank1a  | RMEVQLK  | -ETTHQLEMCKL | -----  | KLELQAAGGSGRKRVDKGS   | -----               |
| Medaka Kank1a       | RLEVQLK  | -ETTHQTEMAKL | -----  | KLELQAAGGSTRKRADKGLM  | -----               |
| Fugu Kank1a         | RLEVQLK  | -ETTHEMEMGKL | -----  | KLELQAAGGSNKKKADKGF   | -----               |
| Tetradon Kank1a     | RLEVQLK  | -ETTHEMEMGKL | -----  | KLELQAAGGSNKKKADKGF   | -----               |
| Tilapia Kank1a      | RLEVQLK  | -ETTHQMEMGKL | -----  | KLELQAAGGSNKKKADKGLM  | -----               |
| Amazon molly Kank1a | RLEVQLK  | -ETTHEMEMGKL | -----  | KLELQAAGGSNKKKADKGLM  | -----               |
| Mouse KANK3         | LLRGRLLR | -----        | ELEEA  | -----                 | HEAAVTRPQSRDVAAQTTL |
| Rat KANK3           | LLRGRLLR | -----        | ELEEA  | -----                 | HEAIVTRS            |
| Dog KANK3           | LLRCRLR  | -----        | ELEEA  | -----                 | REAAEEAEEAQAQRQPP   |
| Human KANK3         | LLRGRLLR | -----        | ELEEA  | -----                 | REAAEEAAGARAQLREATT |
| Lamprey             | RVQRLH   | --EQQALLTDN  | -----  | YALADAFAPATELGSLS     | -----               |
| Coelacanth KANK3    | MLEGHLK  | --EATEELEKL  | -----  | RVEVCSRR--PRKMVNKEVM  | -----               |
| Frog Kank3          | LLEGHLK  | --EAANELEEL  | -----  | RVAVYSRR--QKDMADKEVM  | -----               |
| Turtle KANK3        | MMEGHLK  | --DATKELEEL  | -----  | RVEVCSRR--PRTLIDKEIM  | -----               |
| Aligator KANK3      | MMEGHLK  | --EATKELEEL  | -----  | RVEVCSRR--PKLIDKEIM   | -----               |
| Eagle KANK3         | LMEGHLR  | --EATRELEEL  | -----  | RLEVCARR--PRGRVDKEVT  | -----               |
| Chicken KANK3       | LMEGHLR  | --EATRELEEL  | -----  | RMEVCARQ--PRSRADKEVT  | -----               |



|                     |                                    |
|---------------------|------------------------------------|
| Human KANK2         | -----VDTVRVVEGPREVEVV-----         |
| Aligator KANK2      | -----                              |
| Spotted gar Kank2   | -----SMADAVMMTSLGWQEL-----         |
| Cave fish Kank2     | -----QADHAVRATSLGWQEQ-----         |
| Herring Kank2       | -----P--QAEHPVKATSLGWQEQ-----      |
| Zebrafish Kank2     | -----QVDHAVRATSLGWQDQ-----         |
| Tetradon Kank2      | -------HPVMATSTGWQEP-----          |
| Fugu Kank2          | -----QAEHPVMATNTGWQEP-----         |
| Medaka Kank2        | -----QVDHPVMATSLGWQEP-----         |
| Stickleback Kank2   | -------ATSVGWREP-----              |
| Tilapia Kank2       | -----QAEHPVIATSLGWQEP-----         |
| Amazon molly Kank2  | -----QAEHPVMATSLGWQEP-----         |
| Platyfish Kank2     | -----IQVYTLEKPTVVEVGTLLRAE-----    |
| Coelacanth KANK2    | -----STADAIIMTCVQWQEL-----         |
| Anole lizard KANK2  | -----TGDVGHPTEREVREE-----          |
| Turtle KANK2        | -----TVKVVQVQREPEIAAS-----         |
| Tetradon Kank1b     | -----ARP--STAGASSEARPTTASQ-----    |
| Medaka Kank1b       | -----ARP--STASIGTEIKPFTKSQ-----    |
| Amazon molly Kank1b | -----AKP--HTASIGTTTTLSTQSQ-----    |
| Platyfish Kank1b    | -----AKP--HTASVGTTARFPTQSQ-----    |
| Frog Kank4          | -----EYKDIAVNTEQPPKDE-----         |
| Zebrafish Kank1b    | -----PLVKCTATQTGSQNH-----          |
| Tilapia Kank1b      | -----PLVKCTATQTGSQNH-----          |
| Fugu Kank1b         | -----PLVKCTATQTGSQNH-----          |
| Cavefish Kank1b     | -----PKMQSSAFQTTTQTRSV-----        |
| Spotted gar Kank4   | -----LTEEAEARANLKEAKVLQRAA-----    |
| Coelacanth KANK4    | -----LPGQKIRMDSKPAVQEEKCILVDK----- |
| Frog Kank1          | -----AQP--LMFSRTTEASVEMKDQ-----    |
| Shark Kank1         | -----ARP--AVCSVSVQAAVQTKSQ-----    |
| Coelacanth KANK1    | -----VQP--LVSSRAVEAVVQTRDQ-----    |
| Mouse KANK1         | -----AQP--LVFSKLVEALVPTRDQ-----    |
| Rat KANK1           | -----AQP--LVFSKLVEALVPTREQ-----    |
| Dog KANK1           | -----AQP--LVGDKMVEAVVPTRDQ-----    |
| Human KANK1         | -----AQP--LVFSKVVEAVVQTRDQ-----    |
| Anole lizard KANK1  | -----AQP--LLFSRAVEAVVQTRDQ-----    |
| Eagle KANK1         | -----AQP--RVISRMVEAVIQTRDQ-----    |
| Chicken KANK1       | -----AQP--LVVSRMVEAVVQMRDQ-----    |
| Goose KANK1         | -----AQP--LVVSRVVEAVVPMRDQ-----    |
| Turtle KANK1        | -----AQP--LVFSRMVEAVVQTRDQ-----    |
| Aligator KANK1      | -----TQP--LVFSRMVEAVVQTRDQ-----    |
| Spotted gar Kank1   | -----ARP--AVYSTSVEAKVQMOSQ-----    |
| Herring Kank1       | -----ARP--EMYSTSVEARVSTHSL-----    |
| Zebrafish Kank1a    | -----ARP--EMYSTSVEARVSTHTQ-----    |
| Cave fish Kank1a    | -----ARP--EMYSTSVEAKVSTQSQ-----    |
| Stickleback Kank1a  | -----ARP--ETYDACVEARVQTRSV-----    |
| Medaka Kank1a       | -----VRP--EVYSVSVEAKVQLHSR-----    |
| Fugu Kank1a         | -----VRP--ETYNVYVEAKVQMRDQ-----    |
| Tetradon Kank1a     | -----VRP--EMYSVFVEAKVQMRDQ-----    |
| Tilapia Kank1a      | -----VRP--EMYSVCVEAKVQTRSQ-----    |
| Amazon molly Kank1a | -----VRP--EMYNASVEAKVQMRSQ-----    |
| Mouse KANK3         | -----GCTEKTQTQTELPVENQ-----        |
| Rat KANK3           | -----QSREVATQTTLGYTEK-----         |
| Dog KANK3           | -----QPQPQPREAATQTQWG-----         |
| Human KANK3         | -----QTPWSCAEKAAQTESP-----         |
| Lamprey             | -----                              |
| Coelacanth KANK3    | -----IQP--HTANAFVEAIIISVANQ-----   |
| Frog Kank3          | -----AHP--QTLETASEAVVSMNLNQ-----   |



Turtle KANK3 -----AKP--QMVEAQAEAAVPMQSQ-  
 Alligator KANK3 -----AKP--QLAEAYVEAVVPMQSQ-  
 Eagle KANK3 -----AKP--QVAEALVEAAVVTQNR-  
 Chicken KANK3 -----ARP--QVAEALVETQPGVCD-  
 Goose KANK3 -----  
 Spotted gar Kank3 -----ARP--EMASVLVEAVVSLTST-  
 Zebrafish Kank3 -----AKP--ETVSIRLETCEPVCVSV-  
 Cavefish Kank3 -----  
 Herring Kank3 -----VRT--QTAHVGTDALPAAPPK-  
 Stickleback Kank3 -----LKKRQMTIAEY-  
 Fugu Kank3 -----AKA--DTADAQVETATPHFKH-  
 Tetradon Kank3 -----  
 Medaka Kank3 -----VTP--DVKNVQLETLTTSALKH-  
 Tilapia Kank3 -----  
 Amazon molly Kank3 -----AKP--DTRNAQVETLAPVVKH-  
 Platyfish Kank3 -----AKP--DMRNAQVETLGPVVKH-

1710 1720 1730 1740 1750 1760 1770 1780 1790 1800

Hydra -----ND-----VFCDHCKNLKTS--TCVGD DKIDDF-  
 Trichoplax -----  
 Aplasia -----VG-----TNTAPVDKYHKASMTDKQRC SFAATNTEVTHTR--QANNQTEVKMF--LAMDQLRHAASNTQ  
 Snail -----ASTNTFMIDQYHKACMTDKQK CIMAATNTEPLPYR--HSSIQTDLNVE-  
 Fruitfly -----FT-----SCKPDVRHV GSSDDRLLDDVLCEKCAVSKRSV--ACGPE TPAEKV-  
 Hookworm -----GF-----KPEKDELRTKEFDLARA AAVKLLTSEQKQPFVVRGT--AVSR SARLERN-  
 C.elegance -----PVTVRS LHI DTQTDPAASTVDAACSPVLEF TQEEAVKVTVAASS-  
 Tunicate -----LT-----STVGLLLTND FASGNHVESSTVGTSTPRVTRS-DIATSCEGLLKTV--DIGVSAGAKLT-  
 Spider -----IL-----NNSTFNKSTLLSPSVRTKAVQAVEKKA VRNI--GLQISGSVNV E-  
 Lingula TGINFISKMDFGTNTVTVQKKNSATSTTPKLSFPAETQ TISVPIYIMGTETDMKIFLATEQIRNQSTNT--DVHSTV TQAVGTRDDSDFYLRNFGTNT  
 Lancelet -----DE-----DGSTALM CASEHGHLEIVKLLLAQP GCDATITDN--DDSTALSIAMEAGHRDIGVLLYAQVNMG  
 Medaka Kank4b -----ER-----VMVEQDGETVVR--SMEPDY SKGCS-  
 Amazon molly Kank4b -----ERVVVDQEGDETVVR--SIEPERIPASS-  
 Platyfish Kank4b -----ER--VVVDQEGDETVVR--SIEPERIPASS-  
 Stickleback Kank4b -----  
 Fugu Kank4b -----ERVVIE--QVGDQAVVRSV-  
 Tetraon Kank4b -----AAGPERT-  
 Cave fish Kank4b -----LNK--NVERNSAENVW-  
 Medaka Kank4a -----AEPGKV DDEKNQSPMTSSGPPPKDQVRSVSQVE--APSPTVKLTEE-  
 Fugu Kank4a -----RI-----CIEVHPPKERTGSIDHGTETIKTDTCEQPQPQS--KNQPQAQIKGP-  
 Tetradon Kank4a -----IS-----QIVDTQPLT IETEDKGPKE DGETLRETIKEA--VIGEKTVVPVR-  
 Stickleback Kank4a -----RP-----RRRESIDTGTETERVDFTHQETETEIKGVFVHLLQ--NPGPKPRVEDS-  
 Tilapia Kank4a -----QGTDTDKICIERPRASSVDRGTETERVGTVD R--VTETEVAQRAD-  
 Platyfish Kank4a -----QQTETEIERQDNNLSRDAQAEGRVGESETTVRGDI GHVPVKSTA ESEKTKKVQIESE--NVAVEVAANIF-  
 Amazon Molly Kank4a -----QQTETEIERQDNNLSGDAQAEGRVGESETTESEKTKKVQIESENVAVEVA AKIYVT--DVEGIVVQTL D-  
 Herring Kank4 -----PQPVLTS DASVCTDSERIPVSEKAVCTDEEAQP--SNGPKETDLTC-  
 Zebradish Kank4 -----PEFVVKCDASVSTD SKSVLEKGISTEPQPIEDF--KVTESQCSSTQ-  
 Cave fish Kank4a -----PRPLPQLIVTCDVSVSTD SKSVSEKAVLTD A--ELQPDGPKET-  
 Mouse KANK4 -----SEAPDRTDATVNTDPLQELTPRES HDK--NIGVNLNTPD-  
 Rat KANK4 -----SDALDRTDAMVNTDPLRE--LIPRESQDKNIGV--NLLSTPVPECW-  
 Dog KANK4 -----RDSQGQTDAMVNTDPLNGLLTRES CDKSI EVN--LLGSTGESWR-  
 Human KANK4 -----KDTQGQTDVMVNTDPVHG LLTRES CDKGI EVN--LLGSMESESWG-  
 Eagle KANK4 -----PS-----TRSSGALQCYDAAVNTD--LSQVAGAKQAHDK--GVNVNIPVSTK-  
 Chicken KANK4 -----SSMQRGSM LQCNDAVNTELSYVNGSKQV HDK--GINVNIPLSTK-  
 Goose KANK4 -----PS-----GRRSSTLQYDAAVNTE--PSHVNGSKEA HDK--GVNVNIPVSTK-  
 Anole lizard KANK4 -----YTTARNVLQYHDAAVNTELVH EKI AKEAYDK--GVNVRLTVPME-  
 Turtle KANK4 -----SKQDGNVLQYHDAAVNTE--LMQANTFKEAYDK--GVNVNIPVATE-  
 Alligator KANK4 -----CE-----QDGNALPYHDAAVNTE--LIGTDRLKESQDK--GVNVNISVSTK-

```

Frog Kank2 -----RGSEVVSSTKVGH--GVQPQRARDLE-----
Mouse KANK2 -----ASTAAGALAQRAQSLEPYGTGLKALTT--SGGPENTLVFR-----
Rat KANK2 -----ASTAAGAPAQRAQSLEPYGAGLKALAT--SAENTLVFRSH-----
Dog KANK2 -----REVEVASTAAGAPAQRAQSLEPYGTGLRSLAT--PGGVESPA VFR-----
Human KANK2 -----ASTAAGAPAQRAQSLEPYGTGLRALAM--PGRPE SPPVFR-----
Alligator KANK2 -----ARGQAVGPEGQVP--CVGGQV EETRR-----
Spotted gar Kank2 -----QQWGRPGEPSPLQTVVTFSSHPPCREQRTVGIQVY TLEQPT--VVGVR SFQETT-----
Cave fish Kank2 -----DQQQQGRVGTGLHTVVSFSQDDQQRQRTVGIQVY TLEQPT--VVGVTLLRAQ-----
Herring Kank2 -----QQ-----QGGGRLTGSSLQT VVSFTQPPQREQRTVGIQVY TLEQPM--LVRAQGGPSIA-----
Zebrafish Kank2 -----QQQAGAGLHTVVSFTKPHQQR--TVGIQVY TLEQPT--VVGVTLLRAQ-----
Tetradon Kank2 -----HGCSLHTLVSFTQVPQREQRTVGIQVY TLEQPT--VVGVTPLRAE-----
Fugu Kank2 -----QGCSLHTLVSFTQMPQQRQRTVGIQVY TLEQPT--VVGVTPFRAE-----
Medaka Kank2 -----QGRSLHSLV SFTQPPQQRQRSVGIQVY TLEKST--VVEVGTLLRAE-----
SticklebacK Kank2 -----QGCSLHTLVSFTRPPQREQRTVGIQVY TLEQPT--VVEVGTLLRAE-----
Tilapia Kank2 -----QGCSLHTLVFTTQQRHQRDQRTVGIQVY TLEQPT--VVEVGTLLRAE-----
Amazon molly Kank2 -----QGSSLHTLVSFTQPPQREQRTVGIQVY TLEKPT--VVEVGTLLRAE-----
Platyfish Kank2 -----TCSSPSLQ PGGVTEGHHKQTEGLSSFR TYLTM--CVSVPLHFSIV-----
Coelacanth KANK2 -----QA-----GQPRKLA EVSVEG-----LQTSNQL ELVDQR--TMGVQVYISEQ-----
Anole lizard KANK2 -----GPGLAHSPLDNPIRVDTIKVVQIEREPEVVASK--ATGMEHKPORA-----
Turtle KANK2 -----TATGVAHRPQRAQSLESKEPYASLRAL--TLGEP PQAVVV-----
Tetradon Kank1b -----GVGSPTE LCHASAAVQIDVKT VVICCRPELQDV--CAGPDVPM SRW-----
Medaka Kank1b -----GA-----GNHTEFDASTGEATGVK--NVGVSCEPKRKT V--CVGPD FEMSHW-----
Amazon molly Kank1b -----GV-----GNHKEFQDASTGEAAETK--TVGVSCPKTTDS--CTGLD VPM SHW-----
Platyfish Kank1b -----GV-----GNHKEFQDASTGEATEK--TVGVSCPKMTDI--CTGLD VPM SHW-----
Frog Kank4 -----QK-----GNSFSDNISFVTQSVESDNMTNLKQTS DERNELCLLIDSDHPAVIA-----
Zebrafish Kank1b -----TNLLTPAVGGELGRI--SVGISCKPEVKIV--SSGPDTPMVDW-----
Tilapia Kank1b -----TNLLTPAVGGELGRI--SVGISCKPEVKIV--SSGPDTPMVDW-----
Fugu Kank1b -----TNLLTPAVGGELGRI--SVGISCKPEVKIV--SSGPDTPMVDW-----
Cavefish Kank1b -----GV-----GNHSQLVHA AVGGGAVQALHTVGVTKCPETRDM--TS GPDVPIDLW-----
Spotted gar Kank4 -----DT-----VETKLDSDCVCLDAAVGMATKE--EGNIFCDKGVM TD--GIFQQGACENL-----
Coelacanth KANK4 -----KA-----SDNHKCSDAAVNTEIVQEGMOKETCDK--GITVDIHLSTQ-----
Frog Kank1 -----SAGDHVDIIDACVGN SLKTV--SVGVLCSPIVQNA--AAGSS LPMNSW-----
Shark Kank1 -----MV-----GDHVEYADACVGIQOETR--SVGVTCKPDLCDV--AVGPAIPMDCW-----
Coelacanth KANK1 -----IVGNHVNFADVGVGNSIQTN--SVGICTPTLCDI--AVGPEVPLDCW-----
Mouse KANK1 -----MV-----GSHVDTRESCVGT SVQTS--SVGTSCHPDCKNQ--VVGSE LPMNWW-----
Rat KANK1 -----MV-----GSHVDTMDCVGT SVQTS--SVGTSCHPDRKNQ--VVGPE LPMNWW-----
Dog KANK1 -----MA-----GHHLDVVDACVGT SVQTH--SVGVSQPSRESR--LAGPE LPMNCW-----
Human KANK1 -----MV-----GSHMDLVDTCVGT SVETN--SVGISCP ECKNK--VVGPE LPMNWW-----
Anole lizard KANK1 -----MV-----GDRVDIVDSSVGS SLQMS--NVGVLCRPM LTN--AVGPDMPMNWW-----
Eagle KANK1 -----MV-----GDHVDIADSSVGS HLQTS--SIGTSCRPAVRSV--AAGPE LLM SRW-----
Chicken KANK1 -----MV-----GDHVHVADSSVGS HLQMS--SVGTSCRPAVRS T--AAGPE LLM SRW-----
Goose KANK1 -----MV-----GDHVSVADSSVGNHLQMS--SIGTSCQPVVRS T--AVGPE LLM TRW-----
Turtle KANK1 -----MV-----GDHVDVADSCVGNHLQMR--DIGISCRPNLQST--AVGPE LLM NRW-----
Alligator KANK1 -----MV-----GNHVDVTDSSMGT YLQVS--SVGTSCR PVVRS T--AVGPE LPMNRW-----
Spotted gar Kank1 -----AVGNHVVDVADACTGQDSQAS--ATGVSCSP ELRHV--AVGPE LPMNRW-----
Herring Kank1 -----GV-----GNHTESCDVQVQ--AVGVSCQPD TKPA--AVGPDVPM DRW-----
Zebrafish Kank1a -----GV-----GNHVESDASTNHVHQM N--SVGITCRPDARHV--LVGPE LPM DRW-----
Cave fish Kank1a -----GV-----GNHAEFSDNSTGHVSQTQ--TVGVSCR PDLRNV--AVGPE LPM ERW-----
Stickleback Kank1a -----GV-----GAGEHLGPSTQSV--AAGPE TPM ERW-----
Medaka Kank1a -----GV-----GGDLEFARDPDPRAVGGACLP SMQTV--SAGPE TPDQW-----
Fugu Kank1a -----GV-----GNHLEFNHANA AKSSQTC--SVGVSCV--ASGPE IPM DRW-----
Tetradon Kank1a -----GV-----GNHLESSHANA AKSSQAC--TVGVSCQPSLESV--ASGPE IPM DRW-----
Tilapia Kank1a -----GV-----GEHLEFHVSTAKSPQTL--SRGVSCQPSVHSV--ATGPD IPM DWW-----
Amazon molly Kank1a -----GV-----GEHLEFSLQTQ--TVGVSCQPSARSV--ATGPD LPM DQW-----
Mouse KANK3 -----TTQTELPVESQ-----
Rat KANK3 -----CAAKATQTEPAE--ASGPSHENPSG-----
Dog KANK3 -----

```



|                     |                               |                                      |
|---------------------|-------------------------------|--------------------------------------|
| Goose KANK4         | -----                         | -----                                |
| Anole lizard KANK4  | -----                         | -----                                |
| Turtle KANK4        | -----                         | -----                                |
| Aligator KANK4      | -----                         | -----                                |
| Frog Kank2          | -----                         | -----                                |
| Mouse KANK2         | -----                         | -----                                |
| Rat KANK2           | -----                         | -----                                |
| Dog KANK2           | -----                         | -----                                |
| Human KANK2         | -----                         | -----                                |
| Aligator KANK2      | -----                         | -----                                |
| Spotted gar Kank2   | -----                         | -----                                |
| Cave fish Kank2     | -----                         | -----                                |
| Herring Kank2       | -----                         | -----                                |
| Zebrafish Kank2     | -----                         | -----                                |
| Tetradon Kank2      | -----                         | -----                                |
| Fugu Kank2          | -----                         | -----                                |
| Medaka Kank2        | -----                         | -----                                |
| Stickleback Kank2   | -----                         | -----                                |
| Tilapia Kank2       | -----                         | -----                                |
| Amazon molly Kank2  | -----                         | -----                                |
| Platyfish Kank2     | -----                         | -----                                |
| Coelacanth KANK2    | -----                         | -----                                |
| Anole lizard KANK2  | -----                         | -----                                |
| Turtle KANK2        | -----                         | -----                                |
| Tetradon Kank1b     | -----EVRERVEVMEKVNVDIL-----   | -----MITRAVGIETKSRDAETNTEIPVE        |
| Medaka Kank1b       | -----                         | -----EIRERVENKDAAVGIQIFNTLGVGTEMKVR  |
| Amazon molly Kank1b | -----                         | -----EIRERVETSDKAVGIQVFTSTVGVGTEIKLS |
| Platyfish Kank1b    | -----                         | -----EIRERVETSEKAIGIQVSTSTVGVGTDIKLS |
| Frog Kank4          | -----                         | -----                                |
| Zebrafish Kank1b    | -----EVRRRVERKDQCVGSKCA-----  | -----KTQSQCVGTTVCMCDATTITLETMK       |
| Tilapia Kank1b      | -----EVRRRVERKDQCVGSKCA-----  | -----KTQSQCVGTTVCMCDATTITLETMK       |
| Fugu Kank1b         | -----EVRRRVERKDQCVGSKCA-----  | -----KTQSQCVGTTVCMCDATTITLETMK       |
| Cavefish Kank1b     | -----EVRKKVQRRDQCVGKDYVP----- | -----TCSQCVGTAIVIRDTGMVTLELME        |
| Spotted gar Kank4   | -----                         | -----                                |
| Coelacanth KANK4    | -----                         | -----                                |
| Frog Kank1          | -----IVKQKVEMCDTGTGRDL-----   | -----LCDKCVGNDQVLFEDALNIREPID        |
| Shark Kank1         | -----VVHEKVEVQEKVGGHV-----    | -----MCDKTVTCGVNVCFSDMGVN---T        |
| Coelacanth KANK1    | -----VVHEKTEMQDKCIGQHIE-----  | -----VCNKNVGVELCTCEVGINTEESIE        |
| Mouse KANK1         | -----VVKERVAMHDQCVGRSVE-----  | -----TCDRSVGEVSVCEVTSNTEASGS         |
| Rat KANK1           | -----VVKERVGTHDRCVGRSVE-----  | -----TCNRSVGEVSVCEVTSNTEASGS         |
| Dog KANK1           | -----IVKERVVDRDQCTSRSE-----   | -----MCDKSVGEVSVCEVTSNTEESVN         |
| Human KANK1         | -----IVKERVEMHRCAGRSVE-----   | -----MCDKSVGEVSVCEVTSNTEESVN         |
| Anole lizard KANK1  | -----IVKREDMRDQCISSVE-----    | -----TCNQCVGTEISICETGVNTEESVD        |
| Eagle KANK1         | -----LVRERAQVDRDQAGRSVE-----  | -----LRNKAVGAETSVCCEMGINTEEPAG       |
| Chicken KANK1       | -----LVRERAQMRDQCTGRSVE-----  | -----LLDKKVGVEVSVCEVTSNTEESVG        |
| Goose KANK1         | -----LVRERAQVDRDQCTGRSVE----- | -----LYDKQVGVETSVCETGVNTEESVG        |
| Turtle KANK1        | -----LVKERADMRDQCTGRSIE-----  | -----MCDKNVGTSEMSVCEVTSNTEESVD       |
| Aligator KANK1      | -----LVKERPELQDQCTGRSIE-----  | -----KHDKCVGIEMSVCEVTSNTEESVD        |
| Spotted gar Kank1   | -----TVQERVQTDKCTGRSVE-----   | -----MCSKNVGVELSVYETGVNTEESIVG       |
| Herring Kank1       | -----VVQERKEVMDQCVGRQVT-----  | -----MSDKSVGLQLSMCEMGINTEETVE        |
| Zebrafish Kank1a    | -----IVQERTEVQDQCVGRHV-----   | -----MCSQSVGVELSVCEVTSNTEETAE        |
| Cave fish Kank1a    | -----IVQERVEVQDQCVGKQVI-----  | -----LCHQKVGVELSTCEMGNTEETVE         |
| Stickleback Kank1a  | -----VVGVRVEVRDQCVGREAG-----  | -----PSVREAGVNTEESVD                 |
| Medaka Kank1a       | -----VVRRRPPVHDKCVGREVE-----  | -----TCHQLVGAEQSVCEVGNTEADPG         |
| Fugu Kank1a         | -----SVHELVEVKDQCVGRSME-----  | -----TRDQQVGVQNVCEVGNTEESMD          |
| Tetradon Kank1a     | -----VVHELVEVKDQCVGRSVE-----  | -----TCDQLVGVVNAEAGVNTEESMG          |
| Tilapia Kank1a      | -----VVHEQMEVSDKCVGRHVE-----  | -----TCHQQVGVELSVCEVGNTEESVD         |



|                     |                                                                                                     |       |
|---------------------|-----------------------------------------------------------------------------------------------------|-------|
| Dog KANK4           | -----                                                                                               | ----- |
| Human KANK4         | -----                                                                                               | ----- |
| Eagle KANK4         | -----                                                                                               | ----- |
| Chicken KANK4       | -----                                                                                               | ----- |
| Goose KANK4         | -----                                                                                               | ----- |
| Anole lizard KANK4  | -----                                                                                               | ----- |
| Turtle KANK4        | -----                                                                                               | ----- |
| Aligator KANK4      | -----                                                                                               | ----- |
| Frog Kank2          | -----                                                                                               | ----- |
| Mouse KANK2         | -----                                                                                               | ----- |
| Rat KANK2           | -----                                                                                               | ----- |
| Dog KANK2           | -----                                                                                               | ----- |
| Human KANK2         | -----                                                                                               | ----- |
| Aligator KANK2      | -----                                                                                               | ----- |
| Spotted gar Kank2   | -----                                                                                               | ----- |
| Cave fish Kank2     | -----                                                                                               | ----- |
| Herring Kank2       | -----                                                                                               | ----- |
| Zebrafish Kank2     | -----                                                                                               | ----- |
| Tetradon Kank2      | -----                                                                                               | ----- |
| Fugu Kank2          | -----                                                                                               | ----- |
| Medaka Kank2        | -----                                                                                               | ----- |
| Sticklebakc Kank2   | -----                                                                                               | ----- |
| Tilapia Kank2       | -----                                                                                               | ----- |
| Amazon molly Kank2  | -----                                                                                               | ----- |
| Platyfish Kank2     | -----                                                                                               | ----- |
| Coelacanth KANK2    | -----                                                                                               | ----- |
| Anole lizard KANK2  | -----                                                                                               | ----- |
| Turtle KANK2        | -----                                                                                               | ----- |
| Tetradon Kank1b     | DLAPRK-----EKKYSSVACGDCSVHLAVPEGKS-----QTVSTST                                                      |       |
| Medaka Kank1b       | DAGSNTTEMPAENNWFKKEKVKCLSVGCGDFNSINDSAVKDMVSKSVTTDL---IRGVDLGMASPDTSQR-----TNTVSNLVSRET             |       |
| Amazon molly Kank1b | DAESNTDLPLEKLVFQKEKVKCHSVACGAYSVGLTICESKEMISQGITDS-IRRVDQGILASPOMASQR-----TNTVSSSVSRFT              |       |
| Platyfish Kank1b    | DAESNTDELPLEKLVFQKEKVKCHSVACGAYSVDLTICESKEMTSQGITDS-IRRVDQGILASPQTASQR-----TNTVSSSVSRFTN            |       |
| Frog Kank4          | -----                                                                                               | ----- |
| Zebrafish Kank1b    | NRR-----NISYRTVCGDYMVNADLRPIKSFVSQGTVTD-IRSVDLGVMVIPQTVSQR-----TSTAFCTISRSTS                        |       |
| Tilapia Kank1b      | NRR-----NISYRTVCGDYMVNADLRPIKSFVSQGTVTD-IRSVDLGVMVIPQTVSQR-----TSTAFCTISRSTS                        |       |
| Fugu Kank1b         | NRR-----NISYRTVCGDYMVNADLRPIKSFVSQGTVTD-IRSVDLGVMVIPQTVSQR-----TSTAFCTISRSTS                        |       |
| Cavefish Kank1b     | TLSKRK-----VSSRTVCGCDCTIDMNVNVVKPLVSKGMVTD- VKGIDLGITVNPQMSQR-----TNTTISTVSRCTG                     |       |
| Spotted gar Kank4   | -----                                                                                               | ----- |
| Coelacanth KANK4    | -----                                                                                               | ----- |
| Frog Kank1          | QDGTGDLKT-----KELRSVCGDSSVDVIVKPVMESLSCGVNTEF-VNKVDSSTVASFCTADQQ-----TNTEMDTANQYT                   |       |
| Shark Kank1         | DETVEDPDISGGPHSALRAKDVQSVGCGDCLVDVVVFAKELASSSTNTVA-VSTAE LAVMAAPQTTTQQ-----THTQIDTSCKFT             |       |
| Coelacanth KANK1    | NLELFKRAE-----PKESRSVCGDCLVNVIVCLPKELVSCSTNTDI-LSKLD SAVMAVPQTAKA-----SNTVLETTNQFT                  |       |
| Mouse KANK1         | DLTLLKTNLN-----LKDVRISIGCGDCSVDVIVCFPKECTSRSMNTEA-VGQEEAAVMVPHTTDQH-----TSTNLERVDQCT                |       |
| Rat KANK1           | DLTLLKTNLN-----LKDVRISIGCGDCSVDVIVCLPKECTSRSMNTEA-VGQEEAAVMVPHTTDQH-----TSTNLERVDQGT                |       |
| Dog KANK1           | DLTLLKTNLN-----LKEVRSIGCGDCSVDVIVCFPKECTSRSMNTEA-ISQVDAAVTAVPQTASQH-----TSTVLGQVNGAT                |       |
| Human KANK1         | DLTLLKTNLN-----LKEVRSIGCGDCSVDVIVCFPKECASRGVNTA-VSQVEAAVMVPHRTADQD-----TSTDLEQVHQFT                 |       |
| Anole lizard KANK1  | RLSLCKTEAK-----IKEVRSIGCGDCSVNVTVCPPKECVSRSTNTET-FPVNETISCSTNTEV-VCKVECAVMVPHRTAQG-----TNTVLEKTDQLT |       |
| Eagle KANK1         | VPSFRQTARS-----VGAVRSVCGDCSVDMVCTPKERVSRETATEA-VPRVEATVMVPHSTASRQ-----TSTALEMVSQCT                  |       |
| Chicken KANK1       | DLSLCRTARE-----VRETRISIGCGDCSVDVVVCAPKECVSRQTATET-VCRAEATVMVPHSTATQQ-----TSTAMEMVSRCT               |       |
| Goose KANK1         | NLSLCRTAQE-----VRETRIVGCGDCSVDVIVHSPKECVSRRETATEA-VSRAEATVMVPHSTASQH-----TSTALETVSRCT               |       |
| Turtle KANK1        | NLSLCKTEAE-----IKEVRSIGCGDCSVNVTVCPPKECVSRSTNTET-VCKVECAVMVPHRTAQG-----TSTVLMVNGFT                  |       |
| Aligator KANK1      | SLSLCKTEQE-----IKEVRSIGCGDCSVNVTVCPPKECMSRDNTNTEA-ICKVEATVMVPHRTATQQ-----TGTVLEVVNQFT               |       |
| Spotted gar Kank1   | NLDLYKTRLE-----MAKFRSVGCGECSVNVTVCEPKDLVSGTNTDF-VNMVESGIMAVRHHTTSQY-----TNTAVDTVSTST                |       |
| Herring Kank1       | SLGLCKAEAE-----QAKEVRSIGCGDCSVNVTVSPKIDLVSLGTVTDA-VSREDQGVVMVPHETLSQY-----CETDMLGVSRT               |       |
| Zebrafish Kank1a    | GLGLCKREAE-----QAKEFRSICGDCSVDMVVRPIKEMATRSTGTDE-VHRTDFGVMLPICASQY-----TNIETETIDKLT                 |       |
| Cave fish Kank1a    | NLGLCKTEFE-----QAKEYRSIGCGDCSVDLVSPKELFSGQTATDL-VRKLD SAVMVSPTMHCQH-----TNTVEKTVSGRCT               |       |
| Stickleback Kank1a  | RLALCRMAE-----LSRESRSVCGDCSVDVVVRPAKTLRSRGTDFPER-VGTADSAVTAAPESATRQ-----TNTETEVASKST                |       |

```

Medaka Kank1a      GRT-----WAESRVSVCDCGDSVEV---PAKTFVSRGTEADA-VRRTDSAVMAAPLSATQQ-----TNTETQVAAKST
Fugu Kank1a       SLVLRKAKLS-----KESRSVGCDCSDVVIIVSPVKALVSRGTFDDL-IGKVDLGVMAAPESANQQ-----TSTDLEVASKST
Tetradon Kank1a  SLALS KAKFS-----KESRSVGCDCSDVDVTGVPKVLGSRGNTDL-ISKVDSSTVAAPESANQQ-----TNTDLEVVNKST
Tilapia Kank1a   SLTLSKPAVE-----ASKEQRSVGCDCSDVVIIVSPIKALVSQGTETDR-VSQVDSGVTAAPPELLTQE-----TSTEA E V AHKYT
Amazon molly Kank1a GPGFCRTAAE-----PIKQSRSVGCDCSDVVNVT PVKTFVSRGTDFDV-VGTIDSAVMAAPDSASQQ-----TGTDTEYERST
Mouse KANK3
Rat KANK3
Dog KANK3
Human KANK3
Lamprey
Coelacanth KANK3
Frog Kank3
Turtle KANK3
Aligator KANK3
Eagle KANK3
Chicken KANK3
Goose KANK3
Spotted gar Kank3
Zebrafish Kank3
Cavefish Kank3
Herring Kank3
Stickleback Kank3
Fugu Kank3
Tetradon Kank3
Medaka Kank3
Tilapia Kank3
Amazon molly Kank3
Platyfish Kank3

```

2010 2020 2030 2040 2050 2060 2070 2080 2090 2100

```

Hydra      ...|...|...|...|...|...|...|...|...|...|...|...|...|...|...|...|...|...|...|...|...|...|...|...|...|...|...|...|...|...|...|...|...
Trichoplax -----CDKCNNLKTLS CGV GDC TIDNLLC DRC SNK TFFD -IGVSED---SVNYSCCTSC TQK SVRSIGI -GEGNINDTF-----
Aplasia    -----RNGHADNAAKTIS IADI QEENLNTD-----GEKDSQNKY-----
Snail      KLISKERTRSTTSGG TNRTVQQFSDGNV VGGEGEGGGGSSGT DGMWSSSL S QSQS -SSSSSYDRSYNGS AGGSLTYG SVS GGVSGGV TGTAGDAGGYQ
Fruitfly   RRSSAPVTLV GKQSE SLE TNM TMN SSK FQV S PRRS D S F Q E T V T H Y I I T K D G K -KLISE E K T T T S R G G H S S S V N H Y T G N A S I E G R S S L T D A S
Hookworm   GSQTTTAVV RSTGAQ VNPQQHSGVQ CATEQVSRQTD TKGLQRLTRS QTKAEQV S -E S V P R P T R R H T A S N T D K V E E A P A K V R T S H S A C N T E E V R
C.elegance -----KGD LLEYIAEK NKT VSTSP SAPATTPS-----GETADA-LKSKV LKKEV P P P P S N L P D P I P A R I
Tunicate   -----AAAADCE ECL R Q D V F T R N V G V G A C S I S D K I C V S C D N Q V V E A-----DENEAPGFKHD TKDDQK QRF EI -AKANAVKKL
Spider     ERVCIPNASVAVGT ELQTC DQC DTHVATR RTTSTIADIRKPSTDA-----VQQT-AD VATYNSSTDCDDIIP IVTSSTTNTQCV-TTQNVSTQY
Lingula    -----REVEKAFNQ NQ ILK H S V A V G D F N I L D T I C-----ALCLKA-KTSVGVGDS DINISFCDR CRSVKTVSTSC-GEASIYDVC
Lancelet   TGMTVSLDSTDLGPKQE IIPHHTIYGGKR IIDSSV GQGYKPSVATY TSMRSANRSPSPTE TSYRITESRERSGGGT VTGTVEGGDSGV THHTEY
Medaka Kank4b KPPVETASVSTNTFVVNTIDKVN TAVN LKTVAVNGVDLDCR CADVKTKT-VAVGVC---SIKDTICDR CNNME S K T V G V -G R C T I N D I T V
Amazon molly Kank4b -----LALRHP P Q K M S S R G G V E P A D G T A D S M S T-----
Platyfish Kank4b -----VITRTPPSQAQRH QDSVMSDGV T N T F I I-----
Stickleback Kank4b -----IISRTVP SHAQRHQD LIMSDGGTDT F I I-----
Fugu Kank4b -----GKSAGHGE GAGATVV-----
Tetraon Kank4b -----VRAEGTEEHS PENKTSEHAKVRKPEA-----SVQVQE-SGQCGL EEGLKPHHASKAPAKS HTE
Cave fish Kank4b -----SKVKLPKAQSKTDAQK P S S L S E L P S R P K S I Q T Q S Q S Q A S T S R R D S K E I E S Q Q P Q K G V G E T Q S L R R S S N E A A Q R R G S S E A Q A L R R G S G E A Q A A R R G
Medaka Kank4a -----PPHEDTQKKH PAPA PAQK PQRGE SQARTTRQG---SCDTQT-QTGSRKTSSEAKPAHKDGSDAQSLRRAS-GETAQR RGS
Fugu Kank4a -----PQRGKPPAADQAE P S T P Q Q P A P V R P R R G S S E A Q S Q Q -AQPSTKGPQVQ T Q G P P Q L E G T Q V P H P G P
Tetradon Kank4a -----SLAERPSAES S G K Q T K P Q R S E T Q G A P P G A S V K K R P K-----SIQA-QTRRHSKELKASQP P G G V P G E S Q T R P T G Q -V S H E A Q P S S
Stickleback Kank4a -----QQTETE MERRH D N N P A R S V E A E S Q L E A R S P E Q L S E T Q T Q T V S P G -S S E V Q G S R R S S S E A Q A P Q K D A S E T Q S L R R -G S S E A A Q R R
Tilapia Kank4a -----SAQPSEPRENDQMP SVPQVQDSSQA EKLPDKL I E K Q Y N V P Q Q G E S Q S V A I S S E I -Q V K S K P I Q P H S K S Q P A S R R D S K E Q K A P Q R -G S S V S H P Q S R E S G E
Platyfish Kank4a -----SAQPSEPEQENDQMP SVPQVQDSSQA EKLPDEL I K K E S N V P Q Q G E S Q S V S S S S E I -Q V K T K P I Q P H T K S Q H A S R R D S K E Q K A P Q R -G S S V S H P P S R E T G E
Amazon Molly Kank4a -----KKVLV E R V L E E N G V K E S D V I Q S A V T E P A P A E S E A V A N A K S E D V A K E P A V T K E T V G S P S S S E P A L K S P K E G Q P G Q E A Q S Q S R R R S S S E G S G S S A S S
Herring Kank4

```



Zebradish Kank4 EGNNLEVLEMLENTDSIKNKEQECDIKDSELSQITDTKVSENVAESDTEEYVMVESAMVETLASEIEVTEPTVQKTESAESLGIESTVTEKERE-----  
Cave fish Kank4a ---QAVETDVPISPTDNAQEDTDEQRDARYSDKDQVTEVQVSESIMIESDVAEGYVIVEKTEGELVETVAEENTTVRLSTVEYKLPESVNVVER-----  
Mouse KANK4 --PECRAPRAEKNGFPWQNNHKSQSYSPPEEPVLPPQLSLPRGPE---QILASS-LCSCLSMELRIEEEGSEQEGGQEEGAGGL-SRAAGESW-----  
Rat KANK4 -----ASRAEKNGFPWQNTNHSQSYSPPEPALPPQLSLPRGPEQILASSLSC-LSMELRIEEVSEQERDFDGGAGLSLREAGGSFWSRES-----  
Dog KANK4 -----ARGEENGLLWGQAGHKPGDRSPFKLVPPPQLSLPQGFPE---MVLPTS-LHSCLSTELRIEEAGSEQEGSPQVGAEGL-GRAGGSW-----  
Human KANK4 -----IRGEENGLLWGFQDGHNQSNPQAEKRVLLPQLSLPQGFPE---QVLTSS-VHSFLSTELRIEEAGTEQEGGPGGTRGAGGFLWGSDRK-----  
Eagle KANK4 -----GLADAGTGAGHFGAESEAGLHASCFTQKLIDEHLSDDNQNH---RNNYDT-QSLAAHAVTAESYRGRTRIGSNASENKAGF-GEDKPRGGL-----  
Chicken KANK4 -----WADVGTSGGGDGHFAKLSQTEAGLEPGLHAPGETELKIDEQSLDDNQ---NQSYRTRKTRGSSADENEAGF-GEDKTEDGM-----  
Goose KANK4 -----GGTEGPGPHFAELTETEDDLEPGLHAPCLTELKIDEQSFDDNQNRNNY-DTRSLTAHAATAASYRATKTDNNTGKTKA-----  
Anole lizard KANK4 MSNIPVCIQEKDSPSFQRQKEMRQDNDSSSTLELSYNELKIDEHTA---NDKSEK-KAYNNVSRGESSLSVGTDDSTTGKNEHNFQGDIRDSTE-----  
Turtle KANK4 -----GLAAVHTGVREEGAASLAKQGTGIDTEPPVFTSCFTELKIDEQINDDCQHQRNSYDRQSCAASSLIGESCRTGRADSNQNK-----  
Aligator KANK4 ---PIHTDQGLADVHAGIRKKTAFKQKRTGTDIEPAVHTSCFTELQINEHI-RDDCQSQRSYDTECVAPAPTGESYSGT-----  
Frog Kank2 -----WRGAAKATDGEERVYKSKEVVEKPLLS-----PSGPAPKFHLVKKISITGHCSTEE-----  
Mouse KANK2 -----SHEVVETMCPLPTATTGNVHTAKKIS-----ITERSCAGPRMTEPPSSVNRPAASAVVQEN-----  
Rat KANK2 ---EVVETMCPLPTASTSNMHTAKKISITERNCTGAARMADPPP-----SPAEPSPSSYPAAEPENPAPAAQDTTDRREL-----  
Dog KANK2 -----THEVVETAFPTATASTGNVHLVKKISITERSCDTAELPPAPAESPPSPGVEATSLAQPEKSAGGSAARAAD-----  
Human KANK2 ---SQEVVETMCPVPAASNVHMKKISITERSCDGAAGLPEVPA-----ESSSSPPGSEVASLTPQEKSTGRVPTQEPH-----  
Aligator KANK2 -----KVLGVGQTPGPGGQRLGVGSDAQQA---GERAEVVRVVQVPRGPEIAASTAAGPAAQPOHARGL-----  
Spotted gar Kank2 GGTEAELTVTHRREPEQETSFPVHSSNQLQKKSVEGVPVSPGHYPNQGFLQEVNE-QVKATEDQDGTGKSNPTSPTAIHGKQDQLPYSVETPYGY-----  
Cave fish Kank2 PRELPPIAISSKQVREVLRESEVMSVPVSSSALVMETKNQITSLCLRLEKEETHQQSPTELIQSQEDAAKPAQIRALKNFFTEYFGLFNTVLKL-----  
Herring Kank2 EEEACQHTTVEVLQAEESTKSPASQPTLRSIMKRKADGEGSPPT---KKNLQF-IGVNGGYESTSSSESSSESEDESDESDTSEY-HEAPEKLPE-----  
Zebrafish Kank2 AQLAEASHRRYGE SPAAGDSPHEFPPIAISSKQVREVLRESEVMSVPVNTQATMETKCNQVAVTCORLKEGEINQQPAAEAQVDPANPASQSNL-----  
Tetradon Kank2 -----ICSPPAAATEGHRGGQAQGPVTRCVC-----CIPKRRTNHRTRRRPSTRM-----  
Fugu Kank2 -----ICSPPAAAEGRHRLAEGLDASKTTYTPVEFLA-VSSKQVRDLKSELSTSVPIAAPAIARGRRTTASTSRFY-----  
Medaka Kank2 ---SCSSPSPRAGVTESSQHKETEGLTQTSSGAANSQLOQTGLSTVPIAN-----AAVAVATGNQINLVQSEEEETSSSVQSQENS-----  
Stickleback Kank2 ---ICSSPSSLPAACQVAGVLELRLAQAQCLADAVE-LPIAVSSKQVRDLVLSSELSTSVVAVPAFAV-----  
Tilapia Kank2 ---TCSSPPIQPAAGGVEDHHRGRTEVITENACCSAFSLTPDAPVELPIAVSSKQ---SRLSTSVVAVPAIAVASDDDRIVHNKEANESN-----  
Amazon molly Kank2 ---TCSSPQLQPAAGGVTEGHHKQTEAPVELPIAVSSKQVRDLVLSGSLSTSVVSNPAIVVAGSDQIGLVQTKESPEVFSKASSPQSSLRSIM-----  
Platyfish Kank2 -----SKVPELPIAVSSKQVRDLV-----SGLSTSVFVSNPAIVVAGSDQIGLVQTK-----  
Coelacanth Kank2 ---SASPVPVNLQAPVPQRTPEPEVSTVGAAPKVEGAYLDQVFFVFKLFTSKTE-VPYILYKNPEAVEVTFPIQADHCTEVLHVVKKISLTTET-----  
Anole lizard KANK2 ---QTLESKEPYASLRALAESEEVKMPVCATYHSSEVMETTFPVHAGSATPSSTFHCVKKISIACTEEDGN-----  
Turtle KANK2 ---ETAFFPIHAAPHAAPIHGVKIKISIAAEPEGGEETGPG-----GGASPAKINPAQTGIGASTHGL-----  
Tetradon Kank1b NTAHALIRDASMNVTLHTRNRHSNTSQAMTRTVSVGNLADQMKRT-----PESCRCASALKQIQQAQSKVTRDIGV-GFININDSF-----  
Medaka Kank1b NTRQAFINDSSNTLLSTQDKHNTHTLRRTVSVGS-RVRDFMC---TTEYRS-VGVNNTSLHESIRDPETVIKTRDSGV-GFTSIYENF-----  
Amazon molly Kank1b NTSQTFNSDSSNTLLSKHKHTNTHSHFTFRVSVGNG-VGGIIC---TTEYRT-VGVNNT-NLECYKLPDPTVNKATRDGCV-GLTNIYENF-----  
Platyfish Kank1b TSQTFNSDSSNTLLSKHKHTNTHSHFTFRVTVSVGS-VGGIIC---TTEYRT-VGVNTANS-ECYKLPDPTVNKATRDGCV-GLTNIYDNF-----  
Frog Kank4 -----GPEAQSHITSNIDTEQRLDNSDMNITEAMP-SCITVETEHLDAHISQSHNLNNEPSSVVCITEDQPTPDA-----  
Zebrafish Kank1b TLQACVSEASTNTHTLRERHTNTANTVTRSLAIGDGKVCVRVA---AVQMRM-VGTTAY---LDGCTSAADVPNVKTCDIGV-GMANINENI-----  
Tilapia Kank1b TLQACVSEASTNTHTLRERHTNTANTVTRSLAIGDGKVCVRVA---AVQMRM-VGTTAY---LDGCTSAADVPNVKTCDIGV-GMANINENI-----  
Fugu Kank1b TLQACVSEASTNTHTLRERHTNTANTVTRSLAIGDGKVCVRVA---AVQMRM-VGTTAY---LDGCTSAADVPNVKTCDIGV-GMANINENI-----  
Cavefish Kank1b TSQAHVSESSNTTNMPTREHRTNTASVVTRSLAIGDGKVNQDQSP---ALKVRS-IAVGTGTY-LKESTIAPSVKVMTRDTGV-GLANVINY-----  
Spotted gar Kank4 -----TETPKDLRSSKNQTDVSTNEVHVSVKVLIT---EDKVS-AVVSTCDKAVEQAQVLTACNPTAQEDPPI-DCTHNKDGV-----  
Coelacanth KANK4 -DDTTDSSMSSGADRCDDKAKEAVIVVTDKAVDIDQVLLKSSIKLSSEKETT-VVQDPIKSKSNVQSLINDNDESITFAQTEGSRVLEES-----  
Frog Kank1 NTDTLCCIDSSNTALSTYSKQNTETVEMRSVAGDGKVKVENS-----LPKTRSIGVSTSDSDFESSTP-KTKDFGV-GHINIMDNF-----  
Shark Kank1 NTEQVAHMESSNTNLASSCDKETAIAIEMRTVAVGDRVKDVPST---ALKTRS-VGVGT---TATSDIDLEKSSVKTKDSGI-GQININENY-----  
Coelacanth KANK1 STETAILDSSNTVTSAFDKQNTIIVETRTVAVGDRVKDFST---SPKTRS-IGVGPM---ASVSIIEKPTAVKTKDCGV-GLISISENY-----  
Mouse KANK1 NTEAATVESCNTNLLSTMDKQFSTQVEMRTVAIGEGRVDRINP---STKTRS-VGVGTV---LSGNSFDRPCAVKTKESGV-GQINIQDNY-----  
Rat KANK1 NTEVTTLEVESCNTNLLSTLDKQFSTQNVEMRTVAIGEGRVDRINP---STKTRS-VGVGTV---LSGSSDFDKPCAUKTKESGV-GQINIHNDY-----  
Dog KANK1 NTEVATLEVESCNTSVSTLDKQFSTQVEMRTVAIGEGRVKDINS---SAKMRS-VGVGTV---LSGSAGFDRPSAVKTKESGV-GQININDNY-----  
Human KANK1 NTEATLIEESCNTCLSTLDKQFSTQVEMRTVAVGDRVKDINS---STKTRS-IGVGTL---LSGHSDFDRPSAVKTKESGV-GQININDNY-----  
Anole lizard KANK1 NTEVATVDESSTNTFLSTYDQVEMRTVAVGDRVKDINA---AAKTRS-VGVGTLL---LSTSSFDRLSLKTKDCGV-GQININENY-----  
Eagle KANK1 GTEMAALVDCEINTALSSCDKQNTESVETRSVAVGDRVKDIIHA---SAKTRS-VGVGTLL---LSSHPPGFEPKPSAVKTKDCGV-GQINIHENY-----  
Chicken KANK1 NTEAPVAVDCGNTVPSSRDQQTSTVSVEMRTVAVGDRVKDIIHA---SAKMRS-VGVGTLL---LSSHPPGFELSVIKTKDCGV-GQININENY-----  
Goose KANK1 STEVLVLADCSSTNTVPSGHDKQNTVSVEMRTVAVGDRVKDIIHA---SAKTRS-VGVGTLL---YSSHPGFEPKPSAIKTKDCGV-GQININENY-----  
Turtle KANK1 NTESASLLDSSNTILNTYDKQNTVNVEMRTVAVGDRVKDINT---SAKTRS-VGVGTLL---LSSDSSFDKPSVIKTKDCGV-GQINIHENY-----  
Aligator KANK1 STETVSLMDSSSTNTVWSAYDKQNTVSVEMRTVAVGDRVKDINA---SVKTRS-VGVGTLL---LSSYSSSEKPSVVKTKDCGI-GQININENY-----  
Spotted gar Kank1 NTEAVFMDTCTNTTLTKDQKQNTVPTETRTVAVGDRVKVQVQ---TVKTRS-VGVGT---VRSESELEKPSVVKTKDCGV-GQAQIHENF-----

Herring Kank1 STEQIVLVDSCTDTQLCTIDKHTSTASTETRIVAVGDLGVLDVQA---TVKTRS-IAVGTAA--LGDTESERLSAAAKTKDSGV-GQASMHDF-----  
 Zebrafish Kank1a NTDKLVLTDTSTNTQSCSKDKQVGTETPLETRTIAVGDGLVLDAPA---TLKTRS-VSVGTT---SSDDAFLDKLPSCKTKETGI-GHTSIHDF-----  
 Cave fish Kank1a NTESVILIDSCTNTQSNKDKQSTVPLLETRTVAIGEGLVKDIQA---TVKTRS-IAVGT---TASEDTTEKCLASSKTKEKSGV-GHASVHDF-----  
 Stickleback Kank1a NTERSVRTDSSTDTGLLTCEKHTNTVGTDRTRTVAAGEGLVRDAH---AARGRT-VAVGTT---ADAGSILGGPAAARTRECGV-GPVSVQDF-----  
 Medaka Kank1a NTNTPALTDSSHTMHLSTCNRHNTNTPPETRTVAVGEGLVKDALDALS---GAKMRS-VAVGTI---TDAPAKPASAKTKECGV-GPLSVRDNF-----  
 Fugu Kank1a NTKTAVLTDSTDMTFFITCDKQNTAALETRTVAAGEGLVKDVNS---SAKARS-VAVGTAA---DMESFLGKSSCAKTKESGV-GAVSIHDF-----  
 Tetradon Kank1a NTKTAVLTDCTDMSFFITCDKHTNTAVTETRTVAAAGEGLVKDVTS---ATKMRS-IAVGTAA---SVDAFLGKSSCHTKNKECGV-GAVSIHDF-----  
 Tilapia Kank1a NTKHVLSDSFTHMESVTSDDKQNTVETRTVAAAGEGLVKDVHS---TAKMRS-IAVGT---SDVLELLGKLSSTKTKECGV-GPVSVHDF-----  
 Amazon molly Kank1a NTRTAEVTDSCDTDMERTSCDKQNTAPPETRTVAAAGEGLVKDAPT---TAKTRS-VAVGT---SDVGLSLSPKPNPRTKECGV-GPVSIGHDF-----  
 Mouse KANK3 -----PRPTAGDEMAP-----  
 Rat KANK3 -----PRPTAGDEMAP-----  
 Dog KANK3 -----PTDGDRAVAP-----  
 Human KANK3 -----PGSMDGDRAVAP-----  
 Lamprey -----ATQAATPAAEGEIIAD-----PTDTIR-RGPSESASDDVFETEGQAAPPVAEEAEQRGTGHVNAHF-----  
 Coelacanth KANK3 -----KGSQTDPEKLGEVCVSSSIQKVDVNSREKSVFFD-QDMVKEVEVEPGEKRVVSDWEVRTSGK-----  
 Frog Kank3 -----EKSTQANLEKNTVEVQSSMSSTIIEAISMPERSDLILKSKCK---MILLAQDEVDVAKNNQDITKHVEKCDKTEESITVAGKVTALNLTTEG-----  
 Turtle KANK3 -----EKDQADIEAGIDAAMEETDQGVAGDKSK---QTPNGA-GEQGNQVDVAESGVSAGTKTAMPQGGTGT-VEVEQGSRL-----  
 Alligator KANK3 -----EKATQANKSQFRGGEHCACCSSRSTGSADKSTQRQKAGETGNQVNVTEPGAAGGSKAAGAPGEKGPSE-----  
 Eagle KANK3 -----DKGSQTDVGGTVLAGEVEPGAGHPSPGPS-----ARGTGAMGGTCCQSPVPRAATPETTHSGR-----  
 Chicken KANK3 -----PEAIGAAVGPAAALSAEVEDGSQEPAQD-----  
 Goose KANK3 -----  
 Spotted gar Kank3 -----QINRDTQTESRGEAREAIPTV-----STGSQWEKQDGPETGGEQKAPVAVLK-----  
 Zebrafish Kank3 -----QSIQTDPEETSKEQPVLISTGV-----  
 Cavefish Kank3 -----IGVGVSDSDFPVSKTDQ---SMQADS-VECSSEKTPVTRVSTGVQCENLLST-----  
 Herring Kank3 -----QQSVQTDEEVEVKKEEVAKVET-----VSTGSQWESPEEEDDEEGEEEPQQVQKRGQVITIAEAV-----  
 Stickleback Kank3 -----AEKQEGDQGEKTSANAKTASIMA-----  
 Fugu Kank3 -----QQSTQTDAPIKTAACDPAVLVSTGSQWENLSEDNTEHKVLLKRLIIAEYKVSPEELVSTAEEKK-----  
 Tetradon Kank3 -----  
 Medaka Kank3 -----AIQTDAMTAPPEPAPVEQVSIQCQWENMTE-----KAEEOQLTKKRQLTINEYKV-----  
 Tilapia Kank3 -----  
 Amazon molly Kank3 -----EQGTQTDATPEPEPEPEQTPVER-----VSVGCQWENLRGENPEEKKVAVPKK-----RQLTIAEYK-----  
 Platyfish Kank3 -----EQGTQTDATPEPEPEPAMERFSVGC-----QWENEKKTGEQEEERTSDTKT-----

2110 2120 2130 2140 2150 2160 2170 2180 2190 2200

Hydra -----CSKCIANEDKVFIDIDLKLQQPAL-----  
 Trichoplax -----  
 Aplasia TSSSTTSYSGYSSGGSNLASGLTSGQQISSSSLLSGLSSVRESTGGYQTSMSSSSYSSSSRGVGGGQQQISSSSLLSGLSGVSGGGFQQTSMSSSGYSSSS  
 Snail -----IHSNNDISTTEPKSSLDGHNTKHSGSSKVEKIHINLMTNP-----YRTLENLSEVSALVDSQSDIEDSNVSV-----  
 Fruitfly -----KRDVGGCDIVKPHISIIACA-----ANYCDSCKEAIQDLARG-----  
 Hookworm -----  
 C.elegance -----LTNEQKSNFQRGTAVSKSARYDRKRSVDDLDYIVDKKNATSP-----ATSSQEAPPTVPDASESPLTKVVLKKEVFI-----  
 Tunicate -----LTDKVDEATSTDDLKQKHSSTQ-----IDDYVDKVOQLLEEQQSL-----  
 Spider -----DKGSVHQKENAAVGFDFVNDLSCEQC-----QNNSIQRNEMQS-----  
 Lingula -----FISKRGSGDKTGTSGGGGGRRSSSRVEKVISSSGLPLESSAGGGFTKRTEYNVTSSGHVGSRRIGAGGGGGSGGYTRKTERIISSTSS-----  
 Lancelet -----CDKCSNLKTRSIGCTTLANWNQKSVSVLAKVEQTDAGTGDDS-----VLEETVDSGKQDQETKIDIGVEDSIFPLEEVKPPV-----  
 Medaka Kank4b -----AAVLHHIRRIKNNLLDQQWEC-----  
 Amazon molly Kank4b -----RHIKRIKSLLDQQWEC-----  
 Platyfish Kank4b -----RHIKRIKSLLDQQWEC-----  
 Stickleback Kank4b -----  
 Fugu Kank4b -----HHIRKLKRLLDQQWEC-----  
 Tetraon Kank4b -----  
 Cave fish Kank4b -----MEHHVKRVKELHEQWEC-----  
 Medaka Kank4a -----SSDSPSPALGQVVTRLTGLLGEQWAO-----  
 Fugu Kank4a -----SEAQASRRDSGDGQTPRRSGESPT-----SPAALGQVVTRLTGLLGEQWAO-----  
 Tetradon Kank4a -----SLSHNEDVAEKLGEPGSGESPTSPA-----ALGQVVTRLTGLLGEQWAO-----  
 Stickleback Kank4a -----QGSRRSSAETQAPQKMPGETQSGSGESPTSPA-----ALGQVVTRLTGLLGEQWAO-----

Tilapia Kank4a -----GSSEAQGSRRDPGEAQPPRRGSSESPT-----SPAALGQVVTRITGLLGEQWAH  
Platyfish Kank4a TKTRQIRHGSGDAQSHSLSRRSSTEAPSSQKDARETQSLRRGSSEAQRGSSSEAKALRRESGESQTARRGSGESPTSPAALGQVVTRITGLLGEQWAQ  
Amazon Molly Kank4a TKTRQIRHGSGDTQSHSLSRRSSTEAPSSQKDARETQSLRRGSSEAHRGSSSEAKALRRESGESQTARRGSGESPTSPAALGQVVTRITGLLGEQWAQ  
Herring Kank4 -----PAANVVTRIQLLNEQWSSLGSGSPEPSQSAPPTPPPPKFFSSIQKGEGSSSSSLTAVRYRHKGSGSGSASSPAANVVTRIQLLNEQWSS  
Zebrafish Kank4 -----EGSSGLTQQEPKETQGDPPHQSQRASE-----ATASPAAIQVVNRIQGLFNEQWAS  
Cave fish Kank4a -----VVIETSTGDTSTGESQQGDQKQEQQDTQPQPQTQPQ-----RSTETATSPAAIQVVNRIQGLLNEQWAS  
Mouse KANK4 -----STRESAPVIREEATSELPGAERPGRPASSPQ-----DATIGQYVKKIQELLHEQWNC  
Rat KANK4 -----APVIREEASSQLPGAERPGRPASSPQ-----DATIGQYVKKIQELLHEQWNC  
Dog KANK4 -----SSDRKTPPAGREEASSEPLGKERPCRPSSFP-----DATIGQYVKKIQELLQEQWSC  
Human KANK4 -----TPPAGREETSSNLPCKEHPGRPPSSPT-----DATIGQYVKKIQELLQEQWNC  
Eagle KANK4 -----EEEGPPDHEDLPAVDPIGQYVKKIQELLQEQWLC  
Chicken KANK4 -----GEEGLDPKDFPA-----VDPIGQYVKKIQELLQEQWMC  
Goose KANK4 -----GFDEDKTEDGMEDDGHDPHKDFPA-----VDPIGQYVKKIQELLQEQWMC  
Anole lizard KANK4 -----EGNNSEPKKVTDP-----SVSQYVKKIQDILLQEQWMC  
Turtle KANK4 -----PGGNKPVFAGDVKQDLIEENHTEQDSSA-----DDPIGQYVKKIQELLQEQWMC  
Aligator KANK4 -----DLKKGPAEDVKQVLMEEERHTDQDSSD-----ADPISQYVKKIQELLQEQWMC  
Frog Kank2 -----  
Mouse KANK2 -----  
Rat KANK2 -----  
Dog KANK2 -----  
Human KANK2 -----  
Aligator KANK2 -----  
Spotted gar Kank2 -----RLDDLFLKYVNDIEKNTIKKVPHPIC-----SKEVREVLQKSEVS  
Cave fish Kank2 -----LLRFLMFLHKLINCSFAYVNFCDLHYRYESTTTTESSSESSEAES-----DVSEYHEATEKLPDSTAAE  
Herring Kank2 -----SGARPPHPEATGPPATAAAQEPFPEPPQQLS-----TAQPTANEPFPVQSTSQSFPVTDASLQQTVS  
Zebrafish Kank2 -----RSIMKRKADGEPGSPYTKKNLQFLGVNGGYESTSSSESSE-----SSEDESASEYHEATEKLPESATPQ  
Tetradon Kank2 -----  
Fugu Kank2 -----  
Medaka Kank2 -----  
Stickleback Kank2 -----  
Tilapia Kank2 -----  
Amazon molly Kank2 -----KRKAEGEPGSPSTKKNLQFIGVNGGYESTSSDSSSE-----SSDDGSDSSEYHEAREKLPSTNQL  
Platyfish Kank2 -----  
Coelacanth KANK2 -----YEDKLGVDPAVLV  
Anole lizard KANK2 -----GNEDLTESQRLI  
Turtle KANK2 -----WRQVIRMGWVL  
Tetradon Kank1b -----LVGLKTRNMASGSPSHLADPIRMRSVGVGGRIRDVGLSSHP-----ADKLQPRWDPELNHYIGKMHKLLGQEDCV  
Medaka Kank1b -----LVGLKTRNMASGSPSHLDPVKTKSVGVDGRVQEFVTSSSTS-----GHTTQCQRGHELNHYIDKLHRLLEHGDIL  
Amazon molly Kank1b -----LVGLKTRNMASGSPSHIPDPKTRSIGVGDGRIRDFSMSSCAP-----KPKFQQPSQFQWDHELNHYIEKMHRLKDHGDIL  
Platyfish Kank1b -----LVGLKTRNMASGSPSHIPDPKTRSIGVGDGRIRDFTSSCAP-----KPKSQQFSQFQWDHELNHYIEKMHRLKENGDL  
Frog Kank4 -----LVGLKTRNMASGSPSHIPDPKTRSIGVGDGRIRDVNGHIQ-----VLAHPLQPHLCAESEPGLDHYIDRMQKLLKEQQCL  
Zebrafish Kank1b -----LIGLHTRNIACGPSRLPDPVKTRSIGVEVGDGRIRDPEGQMF-----VQNEPGLDHYIDRMQKLLKEQQDL  
Tilapia Kank1b -----LIGLHTRNIACGPSRLPDPVKTRSIGVEVGDGRIRDPEGQMF-----VQNEPGLDHYIDRMQKLLKEQQDL  
Fugu Kank1b -----LIGLHTRNIACGPSRLPDPVKTRSIGVEVGDGRIRDPEGQMF-----VQNEPGLDHYIDRMQKLLKEQQDL  
Cavefish Kank1b -----LVGLKTRNIACGPSRLPDPKTRSIGVEVGDGRIRDVNGHIQ-----VLAHPLQPHLCAESEPGLDHYIDRMQKLLKEQQCL  
Spotted gar Kank4 -----GCVAEQMQEWQKEGTDESGSKALHQEQETDESTS-----SQAALGHYVTRIQELLHEQWAC  
Coelacanth KANK4 -----GQSEQSECDSMNVNTRKAFQDGLGNKEQVKDETQ-----QYPAIVGQYVVKIQLVLLQEQWAC  
Frog Kank1 -----LIGMKSRSIACGPSE-ALPLGPDTRSIAGVDEPFQEQECIPL-----INKEPTPTPAVIDQYIEQVQKLLQEQQML  
Shark Kank1 -----LVGLKTRHICGTVSPTL-ANGNTRKSVGVGDEPAQVAEGGQP-----AVQDPAPQLHHYIELVQKLLQEQQTL  
Coelacanth KANK1 -----LIGLKTRNIACGPTNLPN-MPANTRSVGVGDKLISVASQEAQ-----SEATVGDVHYIERVQKLLQEQQML  
Mouse KANK1 -----LVGLKTRTIACGPPQLTVGLMGSRRSVGVGNEPVGDLLEDPL-----QPQVPSGMMTGLDHYIERVQKLLQEQQTL  
Rat KANK1 -----LVGLKTRTIACGPPQLTVGLMGSRRSVGVGNEPVGDLLEDPL-----QPQVPSGMMTGLDHYIERVQKLLQEQQTL  
Dog KANK1 -----LVGLKTRTIACGPPQLTVGLMGSRRSVGVGDEPVGDFMESFP-----LQAPPMMTGLDHYIERVQKLLQEQQML  
Human KANK1 -----LVGLKTRTIACGPPQLTVGLMGSRRSVGVGDDPVGESLENPQ-----PQAPLMMTGLDHYIERIQKLLQEQQTL  
Anole lizard KANK1 -----LVGLKTRNIACGPPVSV-APSSSTRSIGVDESVESENFVL-----DCPLPLPEMKTGLDHYIERVQKLLQEQQML  
Eagle KANK1 -----LVGLKTRSIACGPPPLPV-VPAGTRSIGVGGESVCEPVSGLL-----ESPLPPPELRTGLDHYIERVQKLLQEQQML  
Chicken KANK1 -----LVGLKTRSIACGPPPLV-VPTSTRSIGVGGDPVCEVSSLL-----ESPLPPPELRTGLDHYIERVQKLLQEQQML

Goose KANK1 -----LVGLKMRSIACGPPPLVV-VPTGTRSIGVGGEPVCEVSVSGLL-----ENPLPPELRTGLDHYIERVQKLLQEQQML  
Turtle KANK1 -----LVGLKMRNIACGPPPLSV-VSASTRSIGVDEPVYEPVSIIV-----ESPLPPEMRTGLDHYIERVQKLLQEQQML  
Aligator KANK1 -----LVGLKMRNIACGPPPPSV-VPASTRSVGVGDEPVYQSVSALV-----ESSLPPEMRTGLDHYIERVQKLLQEQQML  
Spotted gar Kank1 -----LVGLKTRTISCGPSH-QITDSAKTRSIGVDESISEAGQIQQ-----SOLGTAAAGLDHYIEQVQKLLQEQQML  
Herring Kank1 -----LVGLKTRTIA CGPSLPQLPNLSQVGE SPAPT LIQV PPLACPL -----PDQPATGAGLDHYIERVQKLLQEQQML  
Zebrafish Kank1a -----LVGQKTRNIACGPSQSPPTHVKSNEE SVLTEGPNQSQAGA -----GVGLDHYIERVQKLLQEQQML  
Cave fish Kank1a -----LVGLKTRNIACGPSQPCNQASEKSTTVERMVTPEKSLQLQAS -----ACCGVSLDHYIEKVQKLLQEQQML  
Stickleback Kank1a -----LVGLKTRNIACGPSQPSGSEGAVRVE-----DHYIERVQKLLQEQQML  
Medaka Kank1a -----LIGLKTRSIACGPASSVELSQEAAAPLAA-----AVGLDHYIERVQKLLQEQQML  
Fugu Kank1a -----LVGRNTRNIACGPSQAGSPTSKEATEVKASPAPAQAQECFG-----LDHYIGRVQKLLQEQQML  
Tetradon Kank1a -----LVGRNTRNIACGPSQPNGLTSKETTEVKASPAPAQAQE-----GAGLDHYIERVQKLLQEQQML  
Tilapia Kank1a -----LVGLKTRNIACGPSQPAESVASIGTQETA EVK PALAAVHADP -----ATLQAHGGVSLDHYIERVQKLLQEQQML  
Amazon molly Kank1a -----LIGLKTRNIACGPSQPRDAAPSKEKTEAAAAAP-----PPGGVGLDHYIERVQKLLQEQQML

Mouse KANK3 -----  
Rat KANK3 -----  
Dog KANK3 -----  
Human KANK3 -----  
Lamprey -----  
Coelacanth KANK3 -----TVEVITVHKRIT  
Frog Kank3 -----GDEHCL  
Turtle KANK3 -----  
Aligator KANK3 -----  
Eagle KANK3 -----  
Chicken KANK3 -----  
Goose KANK3 -----  
Spotted gar Kank3 -----  
Zebrafish Kank3 -----QWEC  
Cavefish Kank3 -----  
Herring Kank3 -----MGSGAGR RV  
Stickleback Kank3 -----  
Fugu Kank3 -----  
Tetradon Kank3 -----  
Medaka Kank3 -----  
Tilapia Kank3 -----  
Amazon molly Kank3 -----  
Platyfish Kank3 -----

2210 2220 2230 2240 2250 2260 2270 2280 2290 2300

Hydra CHYCG-----NKVDLNDTNLDES-  
Trichoplax -----  
Aplasia GGVSGGVSGGVSGGVSGGVGGGQQQISSSSSSVVSGGDVSTRVEKSYSTVVTN PYRTVENLAAASSLVSGDSL DGGSSSSSSSSSR LMSKT SSE  
Snail ISKTSSD-----GNLYSERTSLNET-  
Fruitfly FSKAS-----PTATRTGGAVRRS-  
Hookworm -----PRPKISKYALPAE-  
C.elegance EPPKQ-----MLPDPPIPARIPRF-  
Tunicate LAENY-----EGFNDVIN-----KEEKTEKKVSRF-  
Spider VGINT-----TIDSSSHLNVSSG-  
Lingula GSGGVSSSTVSSSSGGGSGMAGSGRSSEER-----TVTSTVHHDLP SN  
Lancelet LIQEE-----KTVNVVSFATAAR-----PPELIVESSSSDE-  
Medaka Kank4b VCAEG-----KPGDKGRAL-----KHLDPKVNSLQEE-  
Amazon molly Kank4b LCGEF-----GEKCKPP-----KHPDSKVNLSLQEE-  
Platyfish Kank4b VCGQF-----GEKCKPL-----KHPDPKVNLSLQEE-  
Stickleback Kank4b -----QPPGEQ-  
Fugu Kank4b LCANI-----PSGNPKVRS LQEE-  
Tetraon Kank4b -----  
Cave fish Kank4b LCR-----

Medaka Kank4a LKPAG-----KPGPSKMSSIQSQ  
 Fugu Kank4a LGSSS-----GAQQTAG-----QQGPSKMSSIQSQ  
 Tetradon Kank4a LGSSS-----GAQQPASQ-----Q-----ESFASKMSSIQSQ  
 Stickleback Kank4a LGSST-----TAGKAAG-----KPGPSKMSSIQSQ  
 Tilapia Kank4a LGSSS-----GAQQTAS-----QQGTSKMSSIQSQ  
 Platyfish Kank4a LGSSSGAQQTAGQQESP IAPKQTATKRAEAGK-----GTPAKPAGKGAPAAATTGKAAG-----KSSASKMSSIQSQ  
 Amazon Molly Kank4a LGSSSGAQQTVGQQESP IAPKQTATKRAEAGK-----GTPAKPAGKGAPAAATTGKAAG-----KSSASKMSSIQSQ  
 Herring Kank4 LGSGS-----PEPSQSAPPK-----PPQPSKFSSIQSQ  
 Zebrafish Kank4 LGSGG-----QDAKGESSQ-----KPHSSKISSIQSH  
 Cave fish Kank4a LGSGS-----QEGKGESSQ-----KQPVSKISSIQSH  
 Mouse KANK4 LEHGY-----PELASAI-----KQPASKLSSIQNQ  
 Rat KANK4 LEHGY-----PELASAI-----KQPASKLSSIQNQ  
 Dog KANK4 LEHGY-----PELASAI-----KQPASKLSSIQNQ  
 Human KANK4 LEHGY-----PELASAI-----KQPASKLSSIQNQ  
 Eagle KANK4 LEHGY-----PELASAI-----KQPASKLSSIQNQ  
 Chicken KANK4 LEHGY-----PELASAI-----KQPASKLSSIQNQ  
 Goose KANK4 LEHGY-----PELASAI-----KQPASKLSSIQNQ  
 Anole lizard KANK4 LEHGY-----PELASAI-----KQPASKLSSIQNQ  
 Turtle KANK4 LEHGY-----PELASAI-----KHPASKLSSIQNQ  
 Aligator KANK4 LEHGY-----PELASAI-----KQPASKLSSIQNQ  
 Frog Kank2 -----PATEGNTGGILAQ-----  
 Mouse KANK2 -----PVPAAQDTTDKKP-----  
 Rat KANK2 -----TRPVASQDSQAAE-----  
 Dog KANK2 -----GEPTRQAASCQSQ-----  
 Human KANK2 -----REPTRQAASQESE-----  
 Aligator KANK2 -----ERDGPDLLEMA-----  
 Spotted gar Kank2 SSVFV-----CSPAVVME TVSAT-----  
 Cave fish Kank2 QPETS-----STSVPSVPSVTE-----  
 Herring Kank2 LS-----PATAVATGHCATQ-----  
 Zebrafish Kank2 SLVSSCI-----PQLASETPATQTA-----  
 Tetradon Kank2 -----EPPQAFPPFRSE-----  
 Fugu Kank2 -----ARAASSP-----  
 Medaka Kank2 -----SKPGSLSFLASSP-----  
 Sticklebacc Kank2 -----GTSGNQMGLLHAK-----  
 Tilapia Kank2 -----QSQEGLPKTASSP-----  
 Amazon molly Kank2 QRVTVNKT-----SQPQEESTSVPQQ-----  
 Platyfish Kank2 -----ESPEIFSKSASSP-----  
 Coelacanth KANK2 PAVSS-----SEEVSEVLQ-----KPSQMIVLSASSA  
 Anole lizard KANK2 VRA-----EHPSSHPLQTEQV-----  
 Turtle KANK2 -----GQFRGFRNGGPF-----  
 Tetradon Kank1b QEKVYYFLVQKCH-----SPPQCS PDSSDCD-----  
 Medaka Kank1b LTGVG-----VGNSTSKTVQSGNTMSEEG-----KEKHKRFCSEPTF  
 Amazon molly Kank1b LTGDQSD-----HYPSSKPLSNIKS-----  
 Platyfish Kank1b LTGDQSD-----HYPSSKPLSNFKS-----  
 Frog Kank4 LEHGY-----PDLANAI-----RQPASKLSSIQGGQ  
 Zebrafish Kank1b LTDSH-----  
 Tilapia Kank1b LTDSH-----  
 Fugu Kank1b LTDSH-----  
 Cavefish Kank1b LTDGHF-----EAREEQEVTIQIQ  
 Spotted gar Kank4 LENGH-----PELASTL-----RQPASKISSIQNQ  
 Coelacanth KANK4 LEHGY-----PELANAL-----KQPASKISSIQNQ  
 Frog Kank1 LAENY-----TELAETF-----GEPYSQIGT LNSQ  
 Shark Kank1 LAENY-----TELADAF-----GEPGSHIGSLNCQ  
 Coelacanth KANK1 LAQNY-----SELADAF-----GQPNSQIGSLNCQ  
 Mouse KANK1 LAENY-----SELAEAF-----GEPHSQIGSLNSQ  
 Rat KANK1 LAENY-----SELAEAF-----GEPHSQIGSLNSQ  
 Dog KANK1 LAENY-----SELAEAF-----GEPHSQIGSLNSQ

|                     |                                                                                                       |
|---------------------|-------------------------------------------------------------------------------------------------------|
| Human KANK1         | LAENY-----SELAEAF-----GEPHSQMGSLNSQ-                                                                  |
| Anole lizard KANK1  | LAENY-----AELADAF-----GEPHSQIGSLNSQ-                                                                  |
| Eagle KANK1         | LAENY-----SELAEAF-----GEPHSQIGSLNSQ-                                                                  |
| Chicken KANK1       | LAENY-----SELAEAF-----GEPHSQIGSLNSQ-                                                                  |
| Goose KANK1         | LAENY-----SELAEAF-----GEPHSQIGSLNSQ-                                                                  |
| Turtle KANK1        | LAENY-----SELAEAF-----GEPHSQIGSLNSQ-                                                                  |
| Aligator KANK1      | LAENY-----SELAEAF-----GEPHSQIGSLNSQ-                                                                  |
| Spotted gar Kank1   | LAENY-----SELADAF-----GQPHSQIGSLNSQ-                                                                  |
| Herring Kank1       | LAENY-----SELADAF-----GQPHTQFGSINSE-                                                                  |
| Zebrafish Kank1a    | LAQNY-----SELADAFG-----PPQSQFSSINSE-                                                                  |
| Cave fish Kank1a    | LAENY-----SELADAFG-----PPQSQFSNINSE-                                                                  |
| Stickleback Kank1a  | LAENY-----SELADAF-----GQPQSQFGSINCQ-                                                                  |
| Medaka Kank1a       | LAENY-----SELADAF-----GQPQSQIGSLNSQ-                                                                  |
| Fugu Kank1a         | LAENY-----SELADAF-----GQPQSQFGSINSQ-                                                                  |
| Tetradon Kank1a     | LAENY-----SELADAF-----GQPQSQFGSINSQ-                                                                  |
| Tilapia Kank1a      | LAENY-----TELAEAF-----GQPQSQFGVINSQ-                                                                  |
| Amazon molly Kank1a | LAENY-----SELADAF-----GQPQSQFGSINSQ-                                                                  |
| Mouse KANK3         | -----                                                                                                 |
| Rat KANK3           | -----                                                                                                 |
| Dog KANK3           | -----                                                                                                 |
| Human KANK3         | -----                                                                                                 |
| Lamprey             | -----                                                                                                 |
| Coelacanth KANK3    | M-----RSPSSDVTENHCL-                                                                                  |
| Frog Kank3          | IIQNS-----GEQPEDNDTQKGS-                                                                              |
| Turtle KANK3        | -----IPQDSRRGVHECA-                                                                                   |
| Aligator KANK3      | -----KKQSPCLSLKDSK-                                                                                   |
| Eagle KANK3         | -----DPSAAQDAGAAPP-                                                                                   |
| Chicken KANK3       | -----GRAAPSPA-----                                                                                    |
| Goose KANK3         | -----ASPA-----                                                                                        |
| Spotted gar Kank3   | -----                                                                                                 |
| Zebrafish Kank3     | LDDTE-----PQDSEEQTTSAET-                                                                              |
| Cavefish Kank3      | -----DPQDNQEQSISAEQ-                                                                                  |
| Herring Kank3       | -----GEDVVAAFPATPSP-                                                                                  |
| Stickleback Kank3   | -----                                                                                                 |
| Fugu Kank3          | -----EDVAATTTACSAR-                                                                                   |
| Tetradon Kank3      | -----KHASAQSGAEVAA-                                                                                   |
| Medaka Kank3        | -----SAEEEEIVGVVKNK-                                                                                  |
| Tilapia Kank3       | -----                                                                                                 |
| Amazon molly Kank3  | -----VSPPEEIVVAEEEE-                                                                                  |
| Platyfish Kank3     | -----                                                                                                 |
|                     | 2310 2320 2330 2340 2350 2360 2370 2380 2390 2400                                                     |
|                     | ..... ..... ..... ..... ..... ..... ..... ..... ..... ..... ..... ..... ..... ..... ..... .....       |
| Hydra               | -----                                                                                                 |
| Trichoplax          | -----                                                                                                 |
| Aplasia             | GNLYKENKKNMSRSEA-VQSMETIYDMRRAGSVEDFMPDDIRKYMSIDPSTSKDSGFGEDLLQRFSEKSSSSSTSSSSAAPPSSDKARSMKSMKVSKTVTT |
| Snail               | -----KSVDTFDMRRAGSVEDFMPDDIKKYMSIETSLTKDSGFEDLQSRFSGNLVSSSEGLSSGGASRSVKLSKTIITTTSTSKSG                |
| Fruitfly            | -----TSADSRIPRPKHLSSPSPVRKEFMRQNTYTLATPSPPTPSPQVERKARLSSLOEKPPS-----                                  |
| Hookworm            | -----SAETPDEEEEAADR-----                                                                              |
| C.elegance          | -----KISKWAVTSEEEAAETPDEQEEAQR-----                                                                   |
| Tunicate            | -----INPAF-AQKDNLVVEEKLKEQTSAAISASFHYMQSTPETDESSEEDDEEDGYIPLHEPSIVD-----                              |
| Spider              | -----IHCIDKCSATHSVAKDLATNTVDSK-----                                                                   |
| Lingula             | -----RKSR-TEKRVTVSSTGHSGGTSRMGGGDGRTFKTKIVISPTGEMSEDMGFQSQVSNAEQLMSDFHGRIMGSAMQGMTSGTGDDRNV           |
| Lancelet            | -----V-----EDEDMMIPPLQQAASIKTTEPQVAE-----VQPVRHIVRETVVRETVVTVTPQDGYEELDGEVVKHKEEEKESELEAVDGF          |
| Medaka Kank4b       | -----M-----MELVDILLSHYQQNGDASKSTIKTDTCQK-----                                                         |
| Amazon molly Kank4b | -----M-MELVDVLMGSHKHPEDSDGQKIQRASKSALESDDGSGTQT-----                                                  |
| Platyfish Kank4b    | -----M-MELVDVLMGSHKHEDSDGQKIQRASKSTLESDDGSGTQT-----                                                   |



```

Stickleback Kank4b -----
Fugu Kank4b      -----M-MGLVDIITSYYTQHS DGEEPQLR-----
Tetraon Kank4b -----
Cave fish Kank4b -----
Medaka Kank4a   -----LVSSLSVLSAFYSPSQKGA AASKHPWTPSSTCFPPRVPLPAISS-----
Fugu Kank4a     -----L-VSSLSVLSAFYSPGQKAAGAGKNPP-----FSLLSRSLRLLPLSSD-----
Tetradon Kank4a -----L-VSSLSVLSAFYSPGQKATSASKHPPFSLSSLSLHLPSSD-----
Stickleback Kank4a -----L-VSSLSVLSAFYSPGQKAAAASKQRD-----QGRNTTPPPSPPSLFLFI-----
Tilapia Kank4a  -----L-VSSLSVLSAFYSPSQKAAAASKQEQASPLPLALSSS-----
Platyfish Kank4a -----L-VSSLSVLSAFYSPGQKTAATSKQQ-----
Amazon Molly Kank4a -----L-VSSLSVLSAFYSPGQKAAATSKQQ-----
Herring Kank4   -----L-VSSLSVLSAFYSPGQKKA AAAASR-----
Zebrafish Kank4 -----L-RGSLSALS AFYSPVQKGAAR-----
Cave fish Kank4a -----L-RGSLSALS AFYSPVQKGAAK-----
Mouse KANK4     -----L-LSSLNLLL SAYSQAPEPEPKETPAPPPSTPPPPPPPEISP-----
Rat KANK4       -----L-LSSLNLLL SAYSQAPEPEKSEVPPSSTPPPPPEISP-----
Dog KANK4       -----L-LSSLNLLL SAYS SAHAPPQKGP PAPSASPPMEISP-----
Human KANK4     -----L-LSSLNLLL SAYSQAHPPEKPPASSSSPPVEISP-----
Eagle KANK4     -----L-VNSLN SLLSAYSTQGPADKENSNT H-----YQOLEISP-----
Chicken KANK4   -----L-VNSLN SLLSAYSSQRPADKENSNT HYQOLETSS-----
Goose KANK4     -----L-VNSLN SLLSAYSTQRPADKENSNT HYQOLEISP-----
Anole lizard KANK4 -----L-VNSLNLLL SAYSTQPTDKENSNTQYQOLEISP-----
Turtle KANK4    -----I-VNSLNLLL SAYSTQAPSDKENSNTQYQOLEISP-----
Aligator KANK4  -----L-VNSLNLLL SAYSTQASPDKENSNAQYQQLDLS P-----
Frog Kank2      -----TATWSQMNVS GAAAGREGDG-----
Mouse KANK2     -----TRPAAA SQDSQAADG-----
Rat KANK2       -----GAGGA-----
Dog KANK2       -----EVGGAGEP-----
Human KANK2     -----EAGGTAPPLSSPPGGP-----
Aligator KANK2 -----LPRVLVLA PAHGHAHG AHKISIIETGAA-----
Spotted gar Kank2 -----QLV-SNQLAPL CQRLKEGDMTQOTPHETAPAQEDNSSQPASP-----
Cave fish Kank2 -----TI-APQHRTVPTPQSLSQSPASDSTDTQHCAAGQSSPTATPPQDR-----
Herring Kank2   -----I-VATASV PPLASGSSSGQGDAS PQQTASHGLVFDTORPAVQP-----
Zebrafish Kank2 -----QHSTAQIPTNHTPAAQTTSQSHTTDATTQHV TQSPA AEADVQHCVS QSSVTTTPPP-----
Tetradon Kank2 -----LDPCSSPASSP-----
Fugu Kank2      -----
Medaka Kank2    -----
Sticklebacc Kank2 -----EDETSVQTRPEAVQSQEGPATASSP-----
Tilapia Kank2  -----
Amazon molly Kank2 -----T-AIKMPAITHLQDTKLPENAHQSPA-----
Platyfish Kank2 -----
Coelacanth KANK2 -----PVAVEMGGTVLSASAQQEGPPSPEANTCSSSVASEQGSALSTRDAPQPASP-----
Anole lizard KANK2 -----ARCLSQEPDLNVQTEGEDQASF-----
Turtle KANK2   -----VSDPGLSARLPAASA-----
Tetradon Kank1b -----INLETLAARDSEVKRMITQKLEQQTSSVLQGEYVACTCAFALLVLNLT ELRKWLPPAWVQQSEGFHLQCLNKMWCRAPTRFADKPAK-----
Medaka Kank1b  -----LIRSE-SCHLD FVAAKLEMLPTPQPLDEDCCQSTTNEAEMCHRNSNEVKRMIQLLEQQASSAALQDKP-----
Amazon molly Kank1b -----MTEGEAVIHRFTSHPTDLLSPSQPLNVSKHSEISQDDRSAS-----
Platyfish Kank1b -----MTEGEAVIHRFTSHPTDLLSPSQPLNVSKHPEVVSQDGNASEVKKMIKMLEQQAASAVQDRSAN-----
Frog Kank4     -----L-VNSLNLLL SAYSQAAPAKGH SKMKNHRAEAVP-----
Zebrafish Kank1b -----
Tilapia Kank1b -----
Fugu Kank1b    -----
Cavefish Kank1b -----DHRDTQHGVFGYGSPSKNNISEHKMRHPTRSFNDSASD-----
Spotted gar KANK4 -----L-VSSLNVLSSMYSSQVHKEKTVSLNSGSKSTRCSP-----
Coelacanth KANK4 -----L-MSSLNVLSSVYSTQTSSEKNV GKSSPELVRS P-----
Frog Kank1     -----L-ISTLSSFNSVMKYGSSEELHSGFKRHS AE LDP SAGSNLDCFPESQFISQYANGNTQTINLNQLPEATQCEVQNVPKSAGKPS-----
Shark Kank1    -----L-INTLSSISSAMKYGST EIRSGDAVDLRPDSAEIDTGISCHEHSLSTKSTSLVTTTSQSAIATRVEQVTTVTTIESCETLLQQDN-----

```





|                     |                                                                              |
|---------------------|------------------------------------------------------------------------------|
| Lancelet            | ENKHALSPGSSPAISN-----LRPLRSLCKGKHS-TKK-----VNIKKEIQFVG---V--NGN-             |
| Medaka Kank4b       | SETLRSVFNERL-TAKGNLSDSDCKIQSLHARR-----SETLRSVFNERL-TAKGNLSDSDCKIQSLHARR----- |
| Amazon molly Kank4b | LKKLQSEEDANEGV-QMS--TKGSVVGQDNVVKLCGEASVV--PRG-                              |
| Platyfish Kank4b    | LKKLQSV DANEGV-QMS--TKGSVIGQDNVKLCGEASVV--PRG-                               |
| Stickleback Kank4b  | -----MERRSG-----                                                             |
| Fugu Kank4b         | DGRARSSKRRHSG-----GDNDGKNAVGOYRG-----HQS-                                    |
| Tetraon Kank4b      | -----DGG-                                                                    |
| Cave fish Kank4b    | -----KESSEGRVLSSEHL-PPR---VCSIQEQLVTLVS---L--LSL-                            |
| Medaka Kank4a       | -----AGRLKLSIMKKNGA-ADK--QGNKGAKKNLKFVG---V--NGG-                            |
| Fugu Kank4a         | -----SPGLKLSIMKKEGA-ADK--QGNKRAKKNLKFVG---V--NGG-                            |
| Tetradon Kank4a     | -----SPGLKLSIMKKGV-ADK--QGNKRAKKNLKFVG---V--NGG-                             |
| Stickleback Kank4a  | -----HLCLKLSIMKKNV-ADK--QGNKGAKKNLKFVG---V--NGG-                             |
| Tilapia Kank4a      | -----SLGLKLSIMKKNGA-AGK--QGNKGAKKNLKFVG---V--NGG-                            |
| Platyfish Kank4a    | -----EQGLKLSIMKKNV-ADK--QSGKAKKNLKFVG---V--NGG-                              |
| Amazon Molly Kank4a | -----EQGLKLSIMKKNV-ADK--QSGKAKKNLKFVG---V--NGG-                              |
| Herring Kank4       | -----QSGLKLSIMKKGDC-PQK--PGNGAAKKNLKFVG---V--NGG-                            |
| Zebradish Kank4     | -----QSGLKLSIMKKNDC-PDK--QNGGAKKNLKFVG---V--NGG-                             |
| Cave fish Kank4a    | -----QSGLKLSIMKKNV-ADK--QSGKAKKNLKFVG---V--NGG-                              |
| Mouse KANK4         | -----STSLKLSIMKKNV-ADK--QSGKAKKNLKFVG---V--NGG-                              |
| Rat KANK4           | -----STSLKLSIMKKNV-ADK--QSGKAKKNLKFVG---V--NGG-                              |
| Dog KANK4           | -----STSLKLSIMKKNV-ADK--QSGKAKKNLKFVG---V--NGG-                              |
| Human KANK4         | -----STSLKLSIMKKNV-ADK--QSGKAKKNLKFVG---V--NGG-                              |
| Eagle KANK4         | -----TTSLKLSIMKKNV-ADK--QSGKAKKNLKFVG---V--NGG-                              |
| Chicken KANK4       | -----TTSLKLSIMKKNV-ADK--QSGKAKKNLKFVG---V--NGG-                              |
| Goose KANK4         | -----TTSLKLSIMKKNV-ADK--QSGKAKKNLKFVG---V--NGG-                              |
| Anole lizard KANK4  | -----TTSLKLSIMKKNV-ADK--QSGKAKKNLKFVG---V--NGG-                              |
| Turtle KANK4        | -----TTSLKLSIMKKNV-ADK--QSGKAKKNLKFVG---V--NGG-                              |
| Aligator KANK4      | -----TTSLKLSIMKKNV-ADK--QSGKAKKNLKFVG---V--NGG-                              |
| Frog Kank2          | -----TDPTKEQDKGRN-----AQEDPQPKPAQFPR---L--NGE-                               |
| Mouse KANK2         | -----AGRASLATKRKED-----PADPEVNRNLQFVG---V--NGG-                              |
| Rat KANK2           | -----SLGVQSALKRKEV-----PADPDVHQRNLQFVG---I--NGG-                             |
| Dog KANK2           | -----QGVRSIMKRKEE-----PADPAARRSLQFVG---V--NGG-                               |
| Human KANK2         | -----PAGVRSIMKRKEE-----VADPTAHRSLQFVG---V--NGG-                              |
| Aligator KANK2      | -----QAEARASARTIGE-----DPEPPGGSSYHLGG---I--NGG-                              |
| Spotted gar Kank2   | -----QSSLKLSIMKKNV-ADK--QSGKAKKNLKFVG---V--NGG-                              |
| Cave fish Kank2     | -----VQPIPATDSTQHT-PPH--STATPPEPSSVQSAACTVL--EQT-                            |
| Herring Kank2       | -----ASTSPPASEQTAP-QAK--PTDTSATQSDAQELT-----                                 |
| Zebrafish Kank2     | -----EGDVQCVFQGCNP-----PSTATSLEQNSVQLSSATQQSKATDSN                           |
| Tetradon Kank2      | -----PPSLRSIMKRKAE-----GEPGSPSTTKKNLQFIG---V--NGG-                           |
| Fugu Kank2          | -----SSTLRSIMKRKAE-----GEPGSPSTTKKNLQFIG---V--NGG-                           |
| Medaka Kank2        | -----QSLRSIMKRKAE-----GEPGSPSTTKKNLQFIG---V--NGG-                            |
| Stickleback Kank2   | -----QSSLRSIMKRKAE-----GEPGSPSTTKKNLQFIG---V--NGG-                           |
| Tilapia Kank2       | -----QLSLRSIMKRKAE-----GEPGSPSTTKKNLQFIG---V--NGGI                           |
| Amazon molly Kank2  | -----TDSERKCAHSHTST-TNSTSTPPAKDSASFPVDQIADKHTV--TQE-                         |
| Platyfish Kank2     | -----QSSLRSIMKRKAE-----GEPGSPSTTKKNLQFIG---V--NGG-                           |
| Coelacanth KANK2    | -----ETSLKLSIMKKNV-ADK--QSGKAKKNLKFVG---V--NGG-                              |
| Anole lizard KANK2  | -----TAGIRSIMKRKEE-----HTEIVASKKSLHFVG---I--NGG-                             |
| Turtle KANK2        | -----QGGVRSQTKRQEE-----APELVGKKSLLQFVG---I--NGG-                             |
| Tetradon Kank1b     | -----SSLLPSEGKQKQK-----DQCCSSTRKNMCLLR---L--NPP-                             |
| Medaka Kank1b       | -----TNMCKSVIKKPSG-----DQCSSNRKNMKFVE---A-ATGL-                              |
| Amazon molly Kank1b | -----AAKPWSAKKQGA-----AQCHSSNRKSMKFMK---V--SAG-                              |
| Platyfish Kank1b    | -----ASKPWSAMKQGT-----DQCHSSNRKSMKFMK---V--SAG-                              |
| Frog Kank4          | -----RSSLKLSIMKKNV-ADK--QSGKAKKNLKFVG---V--NGG-                              |
| Zebrafish Kank1b    | -----TGSKPDLLQSQF-----                                                       |
| Tilapia Kank1b      | -----TGSKPDLLQSQF-----                                                       |
| Fugu Kank1b         | -----TGSKPDLLQSQF-----                                                       |
| Cavefish Kank1b     | -----LSSPERSIIKQDI-SPR-----AECRRTVKCLA-----AG-                               |

Spotted gar Kank4 -----PSALKSIMKKKDC-SVR--LGSSGAKKNLKQFVG---V--NGG-  
 Coelacanth KANK4 -----TTMLKSIMKKKNC-----NPEDNGTKKNLQFVG---I--NGG-  
 Frog Kank1 ACIPASPAEGETEFCVSASG-----QTTLKSIMKRKDE-----KKESTNTKKNLQFVG---I--NGG-  
 Shark Kank1 LTPQTDSPSQPATSTICAVSPSS-----TGILKSIMKKKDS-PKK--HETNGTKKNLQFVG---V--NGG-  
 Coelacanth KANK1 DSKTFSPVEDMTSQLNVIDQPMASLYVSSCS-----PGALKSIMKKKDG-----RQDSNGTKKNLQFVG---I--NGG-  
 Mouse KANK1 LPPVNLTDQIATGLYVCPNN-----ENTLKSIMKKSDG-----NKDSNGAKKNLQFIG---I--NGG-  
 Rat KANK1 PVLNLTDDQIATGLYVCPNN-----ENTLKSIMKKSDG-----NKDSNGAKKNLQFIG---V--NGG-  
 Dog KANK1 LSPVNLTDQIAAGLYVCTNS-----ENTLKSIMKKKDG-----NRDSNGAKKNLQFVG---I--NGG-  
 Human KANK1 LSPVNLTDQIAAGLYACTNN-----ESTLKSIMKKKDG-----NKDSNGAKKNLQFVG---I--NGG-  
 Anole lizard KANK1 DKTMSPINLTDQQLASGLYVCTS-----DSMLKSIMKKKDG-----KKEENAKKNLQFVG---I--NGG-  
 Eagle KANK1 KSFSSQDKTLTPINLTDQQLASGLYVCTNS-----ENTLKSIMKKRDG-----KKDMSNTKKNLQFVG---I--NGG-  
 Chicken KANK1 KSFSSQDKTLAAILNLTDDQQLASGLYVCSNS-----ENTLKSIMKKRDG-----KKDLSNTKKNLQFVG---I--NGG-  
 Goose KANK1 RKSFSPODKTLAAILNLTDDQQLASGLYVCSNN-----ENTLKSIMKKRDG-----KKDLSNTKKNLQFVG---I--NGG-  
 Turtle KANK1 KSLSSQDNAIPPIINLTDQQLASGLYVCAANN-----ESTLKSIMKKRDG-----EKDLNGAKKNLQFVG---I--NGG-  
 Aligator KANK1 RTSSSEDDAVPPLNLTDDQQLASGLYVCTNN-----ESTLKSIMKKRDG-----KKDSNGTKKNLQFVG---I--NGG-  
 Spotted gar Kank1 DSTSSALRQSRTSQMTLMDQQMSALHGQSCS-----SNTLKSIMKKKDG-----RQGSNSTKKNLQFVG---V--NGG-  
 Herring Kank1 STALHGS-----QNTLKSIMKKKDG-----RQGSNGTKKNLQFVG---V--NGG-  
 Zebrafish Kank1a TALHGS-----HSTLKSIMKKDGH-----QHNGTKKNLQFVG---V--NGG-  
 Cave fish Kank1a ALHGG-----QSTLKSIMKKKDG-----RQGTNGTKKNLQFVG---V--NGG-  
 Stickleback Kank1a AAATTGGGGGRCLIP-----QSTLKSIMKKKDG-----RPDSNGTKKNLQFVG---V--NGG-  
 Medaka Kank1a -----QSTLKSIMKKKDG-----RPE-SNGTKKNLQFVG---V--NGG-  
 Fugu Kank1a QKSSMDLQMSALHGQSPSS-----QSALKSIMKKKDG-----KADANSTKKNLQFVG---V--NGG-  
 Tetradon Kank1a LVLPEDELSRGTHILPSS-----QSTLKSIMKKKDG-----KPD-SNGTKKNLQFVG---V--NGG-  
 Tilapia Kank1a -----QSTLKSIMKKKDG-----RAD-SNGTKKNLQFVG---V--NGG-  
 Amazon molly Kank1a -----QNTLKSIMKKKDG-----RPDASGTTKKNLQFVG---V--NGG-  
 Mouse KANK3 VGLKSIMKKKDG-IPG--AQSSQGPKSLQFVG---V-LNGE-  
 Rat KANK3 AGILKSIMKKKDG-TPG--AQSSQGPKSLQFVG---V-LNGE-  
 Dog KANK3 AGILKSIMKRRDG-TPG--AQSPGPKSLQFVG---V-LNGE-  
 Human KANK3 AGILKSIMKRRDG--TPGAQPSSGPKSLQFVG---V-LNGE-  
 Lamprey SPTLKSIMKKKDG-AGSAGGDPSSGTTKSLQFVG---V--NGG-  
 Coelacanth KANK3 VGALKSIMKKDGT-S--NKETNRGKSLQFVG---V-LNGE-  
 Frog Kank3 RGALKSIMKNDG-ASK--SQINREKKSLLQFVG---I-LNGE-  
 Turtle KANK3 AGALKSIMKRRDG-FPK--SEAEGRKSLQFVG---V-LNGE-  
 Aligator KANK3 TGSLSIMKRRDG-LPK--NEAEGRKSLQFVG---V-LNGE-  
 Eagle KANK3 SGALKSIMKRRDG-PPR--SEADGSKSLQFVG---V-LNGE-  
 Chicken KANK3 ARALKSIMKRRDG-PPR--SEAEGRKSLQFVG---V-LNGE-  
 Goose KANK3 AGALKSIMKRRDG-APR--SEAEGRKSLQFVG---V-LNGE-  
 Spotted gar Kank3 RSVLKSIMKRRDG-S--TQREPGSRKSLQFVG---V-LNGE-  
 Zebrafish Kank3 AGPLKSIMKRRDG-SGA--GAASSSGKSLQFVG---I-LNGG-  
 Cavefish Kank3 TGPLKSIMKRRDG-SGS--GVACSGGKSLKQFVG---I-LNGG-  
 Herring Kank3 MGTLSIMKRRDG-SSS--SQTRNTGKSLQFVG---I-LNGG-  
 Stickleback Kank3 AGMLKSIMKRRDG-----NNSGEKKSLLQFVG---I-LNGG-  
 Fugu Kank3 TGIKLSIMKRRDG-SSS--DENRTSSKSLQFVG---I-LNGGA-  
 Tetradon Kank3 AGVLKSIMKRRDG-SSA--EQSRTSSKSLQFVG---I-LNGG-  
 Medaka Kank3 TGMKLSIMKRRDG-STS--SDSNSAGKSLQFVG---I-LNGG-  
 Tilapia Kank3 TGLLKSIMKRRDG-NNA--GENRSSGKSLQFVG---I-LNGG-  
 Amazon molly Kank3 TGMKLSIMKRRDG-----SNSSENRKSLLQFVG---I-LNGG-  
 Platyfish Kank3 -----AGMLKSIMKRRDG-----SNSSENRKSLLQFVG---I-LNGG-

2510 2520 2530 2540 2550 2560 2570 2580 2590 2600

Hydra -----FYKSKD-----DLE-----SPEDDYRAIMSDDEDDANGRCKA  
 Trichoplax -----YDIATS-----SGL-----EKEMCNDSVTIANLSDHKDNVQA  
 Aplasia -----DSNLISSERDASALSGSFSSSSGGVGSMS-----YSETTISTVGSSSGSGSSSEQQ  
 Snail HSNFFSSNGATENEMSSSTYSSS-----YSSRT-----DVSVEQDSDSYTQISTDSMTTSSGNYG  
 Fruitfly -----EKRVSISWSRDAS-----PAPLMTSSGTTKSESPEQEPAMS  
 Hookworm -----YKTGSE-----SDE-----DSDSEGSYDTHEDGVDHEES--

|                     |                                                                                                   |                                |
|---------------------|---------------------------------------------------------------------------------------------------|--------------------------------|
| C.elegance          | -----QEDVSD-----                                                                                  | -----SDAESDCSAHSDATFEVNDVDFD   |
| Tunicate            | -----AEGVKS-----DDS                                                                               | -----SSEEDYSSSSDEEEEQSTSADETK  |
| Spider              | -----IHVTSS-----DDA                                                                               | -----VVDSVVRNRFSDDLVTKRNELE    |
| Lingula             | REALNMYKNIQDNERESMSDGSGRVTSFQSSSTTTSSSHESPVKEGVTRIAVTHAPETTGVREVKSVVETDIDADITGETTTTSSSSSSSTASRQTS |                                |
| Lancelet            | -G-----HDESSS-----DDS                                                                             | -----SSEESSEDETDDEDSSSEESS     |
| Medaka Kank4b       | -----VDAAQT-----DAK                                                                               | -----SVQQTGMAAKQQPEKVPVTPVERKD |
| Amazon molly Kank4b | -----MEATQV-----DVH                                                                               | -----PAKRRVQTDKSKQTCPEGHATPV   |
| Platyfish Kank4b    | -----MEATQV-----DVH                                                                               | -----PAKRRIQTDESKQTCPEGHATPV   |
| Stickleback Kank4b  | -----TTRG-----                                                                                    | -----                          |
| Fugu Kank4b         | -----EERESSVGPGAMAA-----                                                                          | -----AQVEANRSGEAAQQQIRSGGAGP   |
| Tetraon Kank4b      | -----                                                                                             | -----AKPKAEAEAPERTAKLKPHP      |
| Cave fish Kank4b    | -----YVSPAG-----ELQ                                                                               | -----AQQPAQTSKLEDPIISVLHKSRVE  |
| Medaka Kank4a       | -----YETTSS-----EES                                                                               | -----SGDEKSKVEVEEVPADKGDASAD   |
| Fugu Kank4a         | -----YESTSS-----EES                                                                               | -----SGEEKPKAEVEEENSSEPEETE    |
| Tetradon Kank4a     | -----YESTSS-----EES                                                                               | -----SGEDKPKAAVEDEDSSGAEK      |
| Stickleback Kank4a  | -----YESTSS-----EES                                                                               | -----SGDEKSKVEVEEEKGSSSPEEKD   |
| Tilapia Kank4a      | -----YETTSS-----EES                                                                               | -----SGDEKSNVEVEEEDSSEPEVEKE   |
| Platyfish Kank4a    | -----YETTSS-----EDS                                                                               | -----SADEKSRAEVEEEDKSEVVVEKE   |
| Amazon Molly Kank4a | -----YETTSS-----EDS                                                                               | -----SGDEKSRVEVEEEDKSEVVVEKE   |
| Herring Kank4       | -----YESTSS-----EES                                                                               | -----SGAENQEEQEQQEDSSEPEEDK    |
| Zebradish Kank4     | -----YESTSS-----EDS                                                                               | -----SGEENQDAVEVESSEPEVEQGE    |
| Cave fish Kank4a    | -----YESTSS-----EES                                                                               | -----SGEENEDEGKEEEEEVDSSPEE    |
| Mouse KANK4         | -----YETTSS-----EET                                                                               | -----SGEDSSPEDLSDSETEKKQDCSE   |
| Rat KANK4           | -----YETTSS-----EDT                                                                               | -----SGEDSSPEDLSDSETEKKQDCSE   |
| Dog KANK4           | -----YETTSS-----EET                                                                               | -----SGEDSSPEDLSDSEAEKKCDGPE   |
| Human KANK4         | -----YETTSS-----EET                                                                               | -----SGEDSTPEDLSDSEAEKKCDGPD   |
| Eagle KANK4         | -----YETTSS-----EDT                                                                               | -----SCEDSPSDGDVESETERRAEDLE   |
| Chicken KANK4       | -----YETTSS-----EDT                                                                               | -----SCEDSPSDGDMESDTERGAGGLE   |
| Goose KANK4         | -----YETTSS-----EDT                                                                               | -----SCEDSPSEGDAESETERRAGGLE   |
| Anole lizard KANK4  | -----YETTSS-----EDS                                                                               | -----SCEETSSEGNDSETERKCDNEE    |
| Turtle KANK4        | -----YETTSS-----EDT                                                                               | -----SCEDSSSEGNDSSEMERKYDTLE   |
| Aligator KANK4      | -----YETTSS-----EDT                                                                               | -----SCEDSSSEGNSDCETERKYESLA   |
| Frog Kank2          | -----MDSASS-----EDS                                                                               | -----GTMENPDSSESTESEYHEASEALA  |
| Mouse KANK2         | -----YESPSE-----DSS                                                                               | -----TAENSEHESTENEGPEPPARVLS   |
| Rat KANK2           | -----YESSSE-----DSS                                                                               | -----TAENSEHESTENEAPPPVRLS     |
| Dog KANK2           | -----YESSSE-----DSS                                                                               | -----TAENFSDNESTENEAPPEERVP    |
| Human KANK2         | -----YESSSE-----DSS                                                                               | -----TAENISDNDSTENEAPPRERVP    |
| Aligator KANK2      | -----YESASS-----DSS                                                                               | -----TAENSEAESTESEYHEASEGLPA   |
| Spotted gar Kank2   | -----YESTSS-----DSS                                                                               | -----SESSDSSSESEYHEANERLPPTQ   |
| Cave fish Kank2     | -----LNQPKT-----TDS                                                                               | -----SSQQVSHQSEAFSPPPQQPTAPP   |
| Herring Kank2       | -----TQTTSP-----TPQ                                                                               | -----QQASQSKTTDLTPQQGASKSPAT   |
| Zebrafish Kank2     | VQPD-----LAQTDV-----SDF                                                                           | -----AAQQTQTQTQFTSAKPQQEASQS   |
| Tetradon Kank2      | -----YESTSS-----DDS                                                                               | -----SSQSSDEGSDSSEYHEPPATDCP   |
| Fugu Kank2          | -----YESTSS-----DDS                                                                               | -----SSESSDEGSDSSEYHEAREKLPE   |
| Medaka Kank2        | -----YESSSS-----DES                                                                               | -----SSESSDEGSDSSEYHEAREKLPA   |
| Stickleback Kank2   | -----YESTSS-----DDS                                                                               | -----SSESSDEGSDSSEYHEAREKLPA   |
| Tilapia Kank2       | S-----YESTSS-----EDS                                                                              | -----SSESSDEGSDSSEYHEAREKLPE   |
| Amazon molly Kank2  | -----ITSTSP-----                                                                                  | -----NSESAPIAIKSSSTCITKSAEVN   |
| Platyfish Kank2     | -----YESTSS-----DDS                                                                               | -----SSESSDDGSDSSEYHEEITSTSP   |
| Coelacanth KANK2    | -----YESTSS-----DT                                                                                | -----SSEDSSENESESEYHEANEGP     |
| Anole lizard KANK2  | -----YESTSS-----EDS                                                                               | -----STAENVSDNESTESEYHEASEGL   |
| Turtle KANK2        | -----YESTSS-----GSS                                                                               | -----TAENSSDNESTESEYHEASEGPP   |
| Tetradon Kank1b     | -----YKPYAV-----EKA                                                                               | -----SSEEEKTERRRERSKVDLPRRP    |
| Medaka Kank1b       | -----                                                                                             | -----LVQEQQERGENETFGKFSPPQGHQ  |
| Amazon molly Kank1b | -----LEPTSA-----YEH                                                                               | -----EEREGRGSDTFRKVSQEGWQA     |
| Platyfish Kank1b    | -----LKPTSA-----F                                                                                 | -----EHEREGRGSDTFGKVSQDGWQA    |
| Frog Kank4          | -----YETTSS-----EDS                                                                               | -----SSSEEF CGTGKNDVSDSCEA QAS |

|                     |                             |                                    |
|---------------------|-----------------------------|------------------------------------|
| Zebrafish Kank1b    | -----Y-----SDE-----         | -----SEDSFSEGCADSEDEENRKRKME-----  |
| Tilapia Kank1b      | -----Y-----SDE-----         | -----SDEDEENDDSEEREDGGVEAAQS-----  |
| Fugu Kank1b         | -----Y-----SDE-----         | -----SDEDEENDDNSGCDVVEKCDSSV-----  |
| Cavefish Kank1b     | -----FERSV-----             | -----SDEDEENDDNSGCDVVEKCDSSV-----  |
| Spotted gar Kank4   | -----YETTSS-----EES-----    | -----SSDDSSSESDECEEEESFNEE-----    |
| Coelacanth KANK4    | -----YETTSS-----EDS-----    | -----SSDESSSESDECELEFPDSCDDE-----  |
| Frog Kank1          | -----YETTSS-----DES-----    | -----SSESSSSETDDECDGNGYNVEE-----   |
| Shark Kank1         | -----YETTSS-----DDS-----    | -----SSDGSSSESDEECDTIGYPPEE-----   |
| Coelacanth KANK1    | -----YETTSS-----DDS-----    | -----SSGGSSSESDEECDTNGYPPEE-----   |
| Mouse KANK1         | -----YETTSS-----DES-----    | -----SSDESSSESDEECDVIEFPPEE-----   |
| Rat KANK1           | -----YETTSS-----DDS-----    | -----SSDESSSESDEECDVIEYPLEE-----   |
| Dog KANK1           | -----YETTSS-----DDS-----    | -----SSESSSSESDEECVENEYQIE-----    |
| Human KANK1         | -----YETTSS-----DDS-----    | -----SSESSSSESDEECGHEYPHDR-----    |
| Anole lizard KANK1  | -----YETTSS-----DDS-----    | -----SSESSSSESDEECGHEYPHDR-----    |
| Eagle KANK1         | -----YETTSS-----DDS-----    | -----SSESSSSESDEECGHEYPHDR-----    |
| Chicken KANK1       | -----YETTSS-----DDS-----    | -----SSESSSSESDEECGHEYPHDR-----    |
| Goose KANK1         | -----YETTSS-----DDS-----    | -----SSESSSSESDEECGHEYPHDR-----    |
| Turtle KANK1        | -----YETTSS-----DES-----    | -----SSESSSSESDEECGHEYPHDR-----    |
| Aligator KANK1      | -----YETTSS-----DES-----    | -----SSESSSSESDEECGHEYPHDR-----    |
| Spotted gar Kank1   | -----YETTSS-----DES-----    | -----SSESSSSESDEECGHEYPHDR-----    |
| Herring Kank1       | -----YETTSS-----DDS-----    | -----SSESSSSESDEECGHEYPHDR-----    |
| Zebrafish Kank1a    | -----YETTSS-----DDS-----    | -----SSESSSSESDEECGHEYPHDR-----    |
| Cave fish Kank1a    | -----YETTSS-----DDS-----    | -----SSESSSSESDEECGHEYPHDR-----    |
| Stickleback Kank1a  | -----YETTSS-----DDS-----    | -----SSESSSSESDEECGHEYPHDR-----    |
| Medaka Kank1a       | -----YETTSS-----DES-----    | -----SSESSSSESDEECGHEYPHDR-----    |
| Fugu Kank1a         | -----YETTSS-----DDS-----    | -----SSESSSSESDEECGHEYPHDR-----    |
| Tetradon Kank1a     | -----YETTSS-----DDS-----    | -----SSESSSSESDEECGHEYPHDR-----    |
| Tilapia Kank1a      | -----YETTSS-----DDS-----    | -----SSESSSSESDEECGHEYPHDR-----    |
| Amazon molly Kank1a | -----YETTSS-----DES-----    | -----SSESSSSESDEECGHEYPHDR-----    |
| Mouse KANK3         | -----YESSSS-----EDG-----    | -----NSDDEDGVAEHPRSSSSGSDSS-----   |
| Rat KANK3           | -----YESSSS-----EDA-----    | -----SNSDDEDVAELPRSSSSGSGDD-----   |
| Dog KANK3           | -----YESSSS-----EDD-----    | -----SDSDSDGAAEPPRSSSSGDDSG-----   |
| Human KANK3         | -----YESSSS-----EDA-----    | -----SDSDGDSSENGGAEPGSSSSGSGD----- |
| Lamprey             | -----YETTSS-----EES-----    | -----SSESSSSESDEEDDDDDDEEEE-----   |
| Coelacanth KANK3    | -----YETTSS-----EES-----    | -----SENEENSSDKVSGDSSD TDVENF----- |
| Frog Kank3          | -----YESTSS-----EES-----    | -----SDNEGDSDDKVSSEDSSDSEALN-----  |
| Turtle KANK3        | -E-----YESTSS-----EEE-----  | -----EEDSEDSSSEKISPTSSDSDAED-----  |
| Aligator KANK3      | -----YESTSS-----EEE-----    | -----GGDSSSEKISPNSDSDAEGGTD-----   |
| Eagle KANK3         | -----YESTSS-----EEE-----    | -----EEEEEGDSSSEKASADSSNSSEEQ----- |
| Chicken KANK3       | -----YESTSS-----EEE-----    | -----EEEEEEEEEGDSSSEKASADSSD-----  |
| Goose KANK3         | -----YESTSS-----EEE-----    | -----EEDGDSSSEKASADSSDSEEGG-----   |
| Spotted gar Kank3   | -----YESTSS-----EEE-----    | -----EDGEEEGTSSGGSGGGSDSSE-----    |
| Zebrafish Kank3     | -----YESTSS-----EEE-----    | -----EEEESSSDGSEAGACDSSVVE-----    |
| Cavefish Kank3      | -----YESSSS-----EEE-----    | -----EEEEDEEGEESADGACSDSS-----     |
| Herring Kank3       | -----YESTSS-----EEE-----    | -----DEEEDGSSSDGSGAGESSSE-----     |
| Stickleback Kank3   | -----YESTSR-----            | -----TSSGESGEGCLDSTEDEAALE-----    |
| Fugu Kank3          | SPR-----YESTSS-----EED----- | -----EEDGSSSDSESGEGCLDSTEDE-----   |
| Tetradon Kank3      | -----YESTSS-----            | -----EKEEEEEDGSSSDSDESGEGCLDS----- |
| Medaka Kank3        | -----YESTSS-----EEE-----    | -----EEEEEDGSSSGESGEGCLDSTE-----   |
| Tilapia Kank3       | -----YESTSS-----EEE-----    | -----EEEEEDGSSSGESVGECLDST-----    |
| Amazon molly Kank3  | -----YESTSS-----EEE-----    | -----EEDDEEVGSSSGESGEGCLDS-----    |
| Platyfish Kank3     | -----YESTSS-----EEE-----    | -----EEEEEEEEEDGSSSGESGEGCL-----   |

2610 2620 2630 2640 2650 2660 2670 2680 2690 2700

Hydra DV-----  
Trichoplax PM-----DLPQDQIINGNSD-----S

Aplasia QQEQEMMSYGSILDRRTGQLKSIMKHTKAELEAASGKKGITFAESVTTGGTSSSSDDSDSTASFEEGSYDSHQGAVVYRCQDDEAIAQGLPGAQMFQ--N  
Snail SLDRATGKLSIMKQSKSEAEERDKKTGIRFAESVTTGGTGS----SSEEDDDTSDSDSTTSFDEGSYDSQQGEVVYKCKDDEVIAQGRPGAQMFQ--N  
Fruitfly SS-----SDSSPPIDVQIAQGARKKS-----STPLKSSQSEGSQV-----TVIEQPATKAQLHQLAQADSE  
Hookworm -----  
C.elegance AA-----  
Tunicate EE-----LKEILMREIEKENDVKVKEEDMKNMVC-----DVGKEVVDQHKENS-----KKEEISLVAAMAKTVKTSVIEERIVGDGAEDE  
Spider NK-----AKSADDTGSFS-----ECSENLPNFLNLPV-----P  
Lingula STNGANGTIRSIMKSSYKSSKSSKKGISFSDDDVTGGYAS-----SSGEESEPESEDES-----FDEGSYDGRHMTITYTCKDDEKIADGAPGTGMFDQ--N  
Lancelet DE-----GGYNC-----ELGKVIKKGKEDQKKD-----VKTISSEIICEDI-----KETDRL-----VSR--E  
Medaka Kank4b GQ-----RDGGAVTAGADCKEK-----KPPRQQKEGNSGSG-----  
Amazon molly Kank4b GA-----ISGQTDGGTVLLEAEGPEKQSKTLEDRTGT-----N  
Platyfish Kank4b GA-----ISGQTDGGTVLLEAEGPENKSKTLEDRTGS-----N  
Stickleback Kank4b -----  
Fugu Kank4b QR-----TDGGAKEKADGPEKTAALKPSPREQMEGSSASG-----CP  
Tetraon Kank4b RE-----QMEGSSASGCPSRG-----  
Cave fish Kank4b SP-----MQVDARERSGDGSDAV-----EYSTQPAELPEES-----D  
Medaka Kank4a QK-----EVERGLMDPEEGHELL-----EEEEGFLGGGKLRLL-----GRK  
Fugu Kank4a KK-----TESQP-----VEKPVVEAEAQQKEE-----DVPAAEGGASGAEQ-----QSERGLMDPEVR-----H  
Tetradon Kank4a RK-----AEPQPAEKPEKEAEAQQKEE-----DVPAAEGGASAAEQ-----RSDRGLL-----D  
Stickleback Kank4a AE-----VSTEGGGAVAAET-----EGERGLLDIEGSQE-----LPEEKAE-----  
Tilapia Kank4a PE-----KEPEKQPEEGAEAQ-----RKDAEVPAGEGSAV-----AQEKETERGLLDPESGQELLEE  
Platyfish Kank4a TD-----KESEESVGIIVADAEVAAA-----APAPSAAAAEEEG-----AVGEDKEVERGLLDLEGGHELLQ  
Amazon Molly Kank4a TD-----KESEESVGIIVADAEVAAA-----AAPAAAAAEEEG-----AVGEEKEVERGLLDLEGGHELLQ  
Herring Kank4 DK-----EKEQGHEAGAEAQEEADSAGAQQEEEEEEAGGPEG-----ATEPRGAEAFM  
Zebrafish Kank4 ED-----SGAAQEEAAAAGEQSEGVQAEGETEGSEEPDVCQAS-----MS  
Cave fish Kank4a QG-----EEKENGAQEEEEDEKEAAATGEQADEAQAKGSECSEEPKPEA-----IID  
Mouse KANK4 SR-----EDRDLHPSCEAGQGVV-----EGTRNSGHTSDRGE-----E  
Rat KANK4 PR-----EDRDMHLSCEAGQGVV-----KGTGNSGHMSEPRK-----G  
Dog KANK4 HR-----RGKEAHNTCKAGQ-----GIPEGISSTGQESG-----PGGD  
Human KANK4 HK-----HVKDAHLTCEAGQGIP-----EGTCHAAQESGPE-----E  
Eagle KANK4 PT-----QAEAGGESEGSSS-----GTSSQERREDGDLQ-----EPSAEAAPCAQ-----H  
Chicken KANK4 PT-----QEQGGGSEGE-----ASFVTSVQETREDD-----D  
Goose KANK4 PT-----QEEGGGESTGASS-----GTSSQERREDDDLQ-----EPVAEAT-----P  
Anole lizard KANK4 HR-----WREDGDEGDENASGTSQCVKHEDTDGKLEETLRG-----S  
Turtle KANK4 HR-----QVKAARENKHASS-----GVSECTRHEDNEPQ-----ELEEITM-----A  
Aligator KANK4 HR-----QVRAAGDRDRASP-----GVSQCTRHKDEELQ-----EREEPPAM-----A  
Frog Kank2 GA-----QAEHLHSLAAGNSDTPKEP-----EREQPAPTATIVSPP-----K  
Mouse KANK2 PA-----ECPQLRPPGAAVATTSLEGP-----QLSQESQRPVPAPEV-----ASG  
Rat KANK2 TA-----EGPQLRPLGPAVGKTSQDER-----QLSQESQRPVPAPEV-----APG  
Dog KANK2 SV-----VEAPQLRPSGTAAAKTSQEEC-----QLPRESQHPVPAEA-----ASG  
Human KANK2 SV-----AEAPQLRPAAGTAAAKTSRQEC-----QLSRESQH IPTAEG-----ASG  
Aligator KANK2 GG-----AETPKATEEEA-----AAGAALSTTQGSND-----  
Spotted gar Kank2 DA-----PRAHSEEAAPGPLQEAATATAFPPAPSEGAEEQDRSTT-----QE  
Cave fish Kank2 ST-----TVPAHTGASQSQT-----DLTTQQEAIQSEAQ-----ISLQSSDMSVQQGAAPPPFDAHAAN  
Herring Kank2 DS-----SSQQHTSQSTATTEPA-----TGNVCSASSANQES-----  
Zebrafish Kank2 KT-----ADLTAQKGAHSTDGSARQDIAISSTTKPAADTAT-----P  
Tetradon Kank2 PA-----AGGAPNPASTAAADVAKESQ-----ETTIRAEQKPAES-----S  
Fugu Kank2 ST-----LQHQQQLTHNRLSDGTGVPQQAATQPSPHQPPAVDMG-----Q  
Medaka Kank2 VK-----TSDATKQODTAQSEASAASSQODSKPAERVPNNS-----G  
Stickleback Kank2 AA-----TRHQQTPEITTPRPTDRSETT-----VPGSRSEFTPPDAT-----A  
Tilapia Kank2 ST-----VHQQTTHNKDSKQEHVLSLKSIVTPSSGTASSQNANQ-----Q  
Amazon molly Kank2 PL-----SQTSTTSCQPESK-----AAPESVKHESSKPV-----  
Platyfish Kank2 NT-----ESAPITIKSSICITKSAEVALSMTTSCQPESKAAPESV-----K  
Coelacanth KANK2 PA-----GHAGQPAEQKQPQ-----EMETSDTNNNEKED-----SEGEKPTLVTAAGGESASSEEA  
Anole lizard KANK2 PA-----AQAAIAEPAKPSGTAATHPRIATEEGGEIPTPAEGQ-----S  
Turtle KANK2 AG-----QTETPRPPATAPQR-----VPAESDTATAGEPP-----R  
Tetradon Kank1b KC-----ARDHKRSQSNVSQL-----SSCFHSESANFLSV-----T



Medaka Kank1b AT-----KGKEGF-----SKRLKDTTKLHKQQ-----  
 Amazon molly Kank1b KK-----GKDGSNKSGKSLK-----L  
 Platyfish Kank1b KK-----GKDGSNKSGKSLK-----LP  
 Frog Kank4 SD-----DKIETVLMPSSEVK-----EIAQEDPEPMVPSQ-----Q  
 Zebrafish Kank1b -----  
 Tilapia Kank1b -----  
 Fugu Kank1b -----  
 Cavefish Kank1b KQ-----LEESSRSTSMRASKM-----E  
 Spotted gar Kank4 TN-----TIWSHCGLNAFFPGD-----D  
 Coelacanth KANK4 EN-----HLQAASNGSEAVSKTIQ-----GKRVPDTEPNELDV-----NATDGFQ-----Q  
 Frog Kank1 SG-----ELYHGVASVIPGSPSN-----LEEKQLNEKEPEKV-----E  
 Shark Kank1 FE-----GNSSEESSEGPVV-----RQPETEKGVSSESE-----ELDKEVDKV-----E  
 Coelacanth KANK1 DG-----HVEQMAGELDGYSNKGILPVSVEEMKEKEAETG-----E  
 Mouse KANK1 EE-----EEEEKDHDRGMAEGHHAVINLGGFKSARVEDEV-----QVPECEPEKE-----E  
 Rat KANK1 EE-----EEEEEEEDHTRGMAEGRHAV-----NIEGFQSARVEDEV-----QVPECEPEKE-----E  
 Dog KANK1 EE-----EEEEEEEDTRGVAEGQHAVNMEGFKSAGAEMEM-----QVPECEPEKV-----E  
 Human KANK1 EE-----EEDEDTRGMAEGHHAVINLGGFKSARVEDEM-----QVQECEPEKV-----E  
 Anole lizard KANK1 EN-----GSLLNAAEERHGLNREEKSA-----RVGGVVDQDEPEPE-----KVE  
 Eagle KANK1 HT-----EEGQPAPRAAPEVVCAMGA-----EKDSTPPECEAEEV-----E  
 Chicken KANK1 VT-----DGEHPVLGPPETSAAGT-----AKDGPPLCEAEEV-----E  
 Goose KANK1 GA-----EEEEEDPALSAPETGAVGA-----EKDRPPLECEAEEV-----E  
 Turtle KANK1 ME-----GGHHELNAEDVGCVGV-----DEEVQAQSESEPEKV-----E  
 Aligator KANK1 GS-----SLPNMEEGHSKI-----NIEDSCSVQVEES-----QVQENEPEKL-----E  
 Spotted gar Kank1 AT-----RSGEGHGKPKREFCNEGAMVVKRECEEREAEKV-----E  
 Herring Kank1 KQ-----AQENVGEEKTGGEEFCNEGAVEVGKRAELSGSEKQ-----E  
 Zebrafish Kank1a RE-----RRKEEFRNNEAV-----DEDRDTELDGQDKR-----E  
 Cave fish Kank1a VK-----EKRRKEEFRNNEGAV-----DVERDVEDMGQDKQ-----E  
 Stickleback Kank1a EE-----EYENVARSVSEEFKPVGFREAGDEREVT-----EPCVSTRDPTNNKS-----ID  
 Medaka Kank1a KG-----EEFHTEGGEDE-----DKEEEESCEKRE-----E  
 Fugu Kank1a KE-----ELKAVEGKSTGEEFQSEGVENVDKKDENECSEKQ-----G  
 Tetradon Kank1a -----  
 Tilapia Kank1a KE-----EHQKVEGESMREEFQPEGAEDVKKDEESSENR-----E  
 Amazon molly Kank1a QE-----VGGRRIGEEFQ-----NEGAEDDKDEEE-----G  
 Mouse KANK3 GG-----SDAGTPGPHNDKADGDC-----LETHPELTAGREG-----E  
 Rat KANK3 SS-----GGSDAGTPGPHNDQ-----DAGDCELEMHPEQK-----T  
 Dog KANK3 RD-----VGDDSGGDVL-----DPEREPEPEAEPPQ-----G  
 Human KANK3 DS-----GGGSDSGTPGP-----PSGGDIRDPEPEAE-----AE  
 Lamprey EE-----EEDDEGLGEVIHQPNNGGAAGRSEAE-----RQDGAQEVGREEP-----VAEAKQ-----E  
 Coelacanth KANK3 IE-----TSEELNVMNEDSDSFENLQHVTGKMKKAERREE-----HEEQGMDLG-----E  
 Frog Kank3 YE-----DTSEEMNVMQDTSDDIEDCAVEEKRKEEKVKRKRDRREQ-----P  
 Turtle KANK3 DA-----NTWDEEIGANVGETASSVEVPEPGTEQRKR-----NGEQTESAPALDP-----T-----E  
 Aligator KANK3 SS-----DEDVNVGENESDLENPEVDTEQRKREEQHEHREH-----IPAPEPP-----E  
 Eagle KANK3 GD-----TETSDEEAEEGEREPG-----QEREGCVTLPEPP-----E  
 Chicken KANK3 SE-----EPGGTDTSEEEEEEDAVDGDQSELCGQQEGEGGSMAPPEPP-----E  
 Goose KANK3 TD-----TSEEEEDAGGGQ-----SEAGEQQEHEGANV-----APPEPT-----E  
 Spotted gar Kank3 GE-----DGALIDTSEDER-----NVNLDDSDSEGEPP-----AAEREEGQQS-----A  
 Zebrafish Kank3 AA-----ALEDTSDDEEMNINADESDE-----NMPACTEELKDQAE-----E  
 Cavefish Kank3 EE-----EAAALEDTSDEER-----NINLESDSDENVQ-----AVTEEGKEQTE-----E  
 Herring Kank3 EE-----EEAALQETSDEERNINLDESDESDEGQTGSGGQQE-----T  
 Stickleback Kank3 DE-----TSEER-----NVNLDESdTDEETL-----RDTSYS-----E  
 Fugu Kank3 AA-----LEEEETSEER-----NINLDESdTDEETL-----RDATYSSD-----V  
 Tetradon Kank3 TE-----DEAALDEETSEER-----NVNLDESdTDEDTP-----SAYSSVA-----E  
 Medaka Kank3 ED-----EAPLEETSEER-----NVNLDESdTDEEML-----QTANYSPD-----A  
 Tilapia Kank3 EE-----DEAALDEETSEER-----NVNLDESdTDEETL-----RAANYSSD-----G  
 Amazon molly Kank3 TE-----EDEAALDEETSEER-----NINLDESdTDEETL-----RAPSYSDDA-----E  
 Platyfish Kank3 DS-----TEEDEAALDEETSEER-----NVNLDESdTDEETL-----RAPNYSSD-----A



2710 2720 2730 2740 2750 2760 2770 2780 2790 2800

Hydra -----IESCKMLHAHFSG---ENQLK-QPAV---LQYMSIIQALWFKTVKRRKRANAIVKSYIDLFQQRVPELLETIMNMSDDEGNTALHF

Trichoplax LEI----RDFINQDFKFNFKLDDHLNE---INILS-SSKL---DEILNQLRKQWFVEVLADNLQIAMLKQWIETTKISSSKALSVIIDMDLNGNTLHH

Aplasia IRE----TYELSGEVREACKILATYALMD---STTIQ-TKQL---NASLNVIQQEWFQVSSHKLSTPHQVEDFLSSVNEISKRLLEYIVNMTDANGNTAIHY

Snail IRE----TYELSEEVREACTILATYALID---STDIQ-TKQL---NACQNIQQEWFVSSMKLSSAHQVEDFLSSVNEISKRLLEYIVNMTDANGNTAIHY

Fruitfly PRK----KTELSQSLKDALKIINDSLLKKGAKPIS-SQSL---KSAKATTIQDHFWTNSSTGKSDPHQVEDYLDYFESLSIPLLEYCVNLSDSNGNTAMHY

Hookworm -----PYEISSPMREAMESLNSHLIQ---PGTIT-PETA---DWALKYVQHEWLKCAARKGSQAGAVDILIEQLRELSPALLKVVVNITDQNGNTALHY

C.elegance -----PFEVSDRLREALENFNSSILE---PGSVA-EETV---EWSAKLVRHVWMTTAGNSSSRyenVDRFVAELGNLGPQILHMVVNFCDQNGNTALHY

Tunicate VFQDENKKYQFTSELLDACDILEMHRV---PKSVN-HSQL---ENATSTVQQEWFVSSMKLSSAHQVEDFLSSVNEISKRLLEYIVNMTDANGNTALHY

Spider PRK----KTELNKEVRAACKVLDNDYLLK---PDRGG-EKKT---LSSLNIIQNEWFKVANQKNSDPHVIEDYLDAFEEFSKLLLERVVNLSDSNGNTALHY

Lingula IRE----TYELSEEMQASCELLSRHLED---PNTIP-TEQV---TAAATIIQQEWFKAAQKQLSSPYMVEDFLSCFNEYSKELLERIVNMTDANGNTALHY

Lancelet LKE----THELSEELQEAACGVLEKHWTT---PKSVP-PREL---MMAMNTIQQEWMKGAQKQSDVQVVRDYLAAFEQMATGVLGKIVNLADGNGNTALHY

Medaka Kank4b ARA----REANDADFVSACHFVKAHMGN---MDNP---SEDM---RKALVTFQHFVWFTTAAEEASEACNVAAACVRGVKKEFPSLLAFLVNLADDNGNTALHY

Amazon molly Kank4b MKG----RDILSADFMTACHFVKDHMDI---TENP---NDDM---RKALVTFQHFVWFTTAAEEASEPSRVAAYLKEVKSEAPPLLAFLVNLADDNGNTALHY

Platyfish Kank4b TKG----RDILSADFMSACHFVKDRMDI---TENP---NDDM---RQALVTFQHFVWFTTAAEEASETSRVAAYLKEVKSEAPPLLAFLVNLADDNGNTALHY

Stickleback Kank4b -----RETVNLDFLAAACHLLKDHMDH---IDNP---NEDM---RKALVTFQHFVWFTTAAEEASESEAGRVSAYLSDVKKTFPSLLAFLVNLADDNGNTALHY

Fugu Kank4b SRG----REIVSSDFMTACQFLNDHMDN---MDNP---NNEM---RKALVTFQHFVWFTTAAEEASESMVGDLAAYLREVRKSTPTLLAFLVNLADDNGNTALHY

Tetraon Kank4b -----RETVSSDFMTACRFLNDHMDN---MDNP---NNEM---RKALVTFQHFVWFTTAAEEASESVPGDLAAYLREVRKATPTLLAFLVNLADDNGNTALHY

Cave fish Kank4b L-----KTFPPDQIIEISIVFKKQKTRIEDPTET-TRE---EEEEEMKQEPQRTCEAECDDPPVKDESEQVETCSGVEEQELSE--DGRGETEI--

Medaka Kank4a VSELFQAQIYKVDKGFIDACVYVKDRMEE---VSSP---DKEM---RQVLVLYQEWFRVSSQKDSQADTVRLYLQVGRTPPTLLPYVNLTDGNGNMAHY

Fugu Kank4a LRE----TREKVDKRFIDACVYVKDRMEE---VSSP---DKEM---RQVLVLYQEWFRVSSQKDSQADTVRSYLQVSLTPTLLPYVNLTDGNGNMAHY

Tetradon Kank4a PEGSSLELEEQAEGFIDACVYVKDRMEE---VSSP---DKEMVRRQVLVLYQEWFRVSSQKDSQADTVRSYLQVSLTPTLLPYVNLTDGNGNMAHY

Stickleback Kank4a -----GEKVNQGFIDACLYVDRMEE---VSSP---DKEM---RQVLVLYQEWFKISSQKESQADTVRLYLQVGFPTPTLLPYVNLTDGNGNMAHY

Tilapia Kank4a QAE----GGKVDKGFIDACLYVDRMEE---VSSP---DKEM---RQVLVLYQEWFRVSSQKDSQADTVRLYLQVGMTPPTLLPYVNLTDGNGNMAHY

Platyfish Kank4a VEE---AEREKVDKGFIDACVYVKDRMEE---VSSP---DKEM---RQVLVLYQEWFRVSSQKDSQADTVRLYLQVGLTPTLLPYVNLTDGNGNMAHY

Amazon Molly Kank4a VEE---AEREKVDKGFIDACVYVKDRMEE---VSSP---DKEM---RQVLVLYQEWFRVSSQKDSQADTVRLYLQVGLTPTLLPYVNLTDGNGNMAHY

Herring Kank4 SSPQPVSEVVDKDFMAACYYLDRRNE---VDNP---NKEM---RQVLMILYQEWFRVSSQKDSQAEAVTLYLREVGNATPTLLSYIVNLADGNGNTALHY

Zebradish Kank4 PQEEQPVSELVDKNFMAACHFLKDRMAE---VSAP---NKEM---RQVLMMLYQEWFRVSSQKDSQAEAVTLYLREVGFHTPTLLRYIVNLADGNGNMAHY

Cave fish Kank4a PQEEQPVSEFVDKNFMAACHFLKDRMAE---VSTP---NKDM---RQVLMVLYQEWFRVSSQKDSQAEAVTLYLREIGNQTPPTLLRYIVNLADGNGNTALHY

Mouse KANK4 VSHLRAERYKPSSEFLNACQTLSQHLPE---TGDTT-KQLL---RQSLNTISQEWFRVSSRKLSSPEAVAAAYLREVQPHSPYLLKLLVNLADRSNGNTALHY

Rat KANK4 VSHMKAERYKPSSEFLNACQALSQHLPE---AGATN-KQLL---RQSLNTISQEWFRVSSRKLSSPEAVAAACLEEVQPSPHLLKLLVNLADRSNGNTALHY

Dog KANK4 LPHPKAERYKPSSEFINACRALSQHLPE---TGATT-EQLL---RQSLNTIRQEWFRVSSRKLSSPEAVAAAYLRGVQPHSPHFLLKLLVNLADGNGNTALHY

Human KANK4 VPHSKAERYKPSSEFLNACRALSQHLPE---TGTTT-DQLL---RQSLNTISQEWFRVSSRKLSSPEAVAAAYLREVQPHSPHFLLKLLVNLADHNGNTALHY

Eagle KANK4 KAD---RCKPSEDFLADCQLLSKHLSE---IRTTS-DKHL---RHVLTVCQEWFRVSSRKLSSPEVVGAYLKALGAIQPPQLLAMVNLADRNNGNTALHY

Chicken KANK4 LQEPGAETCKPSEDFLADCQLLSKHLSE---IRATS-DQHL---RHVLTVCQEWFRVSSRKLSSPEVVTAYLQALGTIQLQLEAVVNLADRNNGNTALHY

Goose KANK4 GTEHKADRCKPSEDFLADCQLLSKHLSE---IRTTS-DEHL---RHVLTVCQEWFRVSSRKLSSPEAVAAAYLQVGLAIQPPQLEAVVNLADRNNGNTALHY

Anole lizard KANK4 MQPHKAERFKPSADFLKGCQLLSKHIPE---IRNTK-DKLL---RHVLTVCQEWFRVSSRKLSSPEAVAAAYLREVQPHSPHFLLKLLVNLADGNGNTALHY

Turtle KANK4 SIQPKTDRCKPSEDFLDCQLLSKHLSE---IRTTN-DKHL---RHVLTVCQEWFRVSSRKLSSPEVVAAYLKEFKAIHPQLLKMIINLADGNGNTALHY

Aligator KANK4 STQHKTDRYKPSDFLNGCRLLRKHLSE---IRTTG-DKHL---RHVFNVCQEWFRVSSRKLSSPEVVAAYLREFQAIQPPQLKRIVNLADGNGNXALHY

Frog Kank2 PTP----RVELSNVLISGCVALKSLDE---GTALP-EMEK---SAAHSVILQEWMMKILRKQVDPAVIRHHLTVFRAMSPRLEVIINMADAKGNTAVHY

Mouse KANK2 PDPEEEIRMDLSPDLISACLALAKYLEN---PNALT-EREL---KVAYTTVLQEWLRLACRSDAHPELVRRHLVTFRAMSARLLDYVNLADSNNGNTALHY

Rat KANK2 PDPEEEIRMDLSPDLISACLALAKYLEN---PNALT-EREL---KVAYTTVLQEWLRLACRSDAHPELVRRHLVTFRAMSARLLDYVNLADSNNGNTALHY

Dog KANK2 ANAEEIIRMELSPDLISACLALAKYLDN---PNALT-EREL---KVAYTTVLQEWLRLACRSDAHPELVRRHLVTFRAMSVRLDYVNLADSNNGNTALHY

Human KANK2 SNTPEEIRMELSPDLISACLALAKYLDN---PNALT-EREL---KVAYTTVLQEWLRLACRSDAHPELVRRHLVTFRAMSARLLDYVNLADSNNGNTALHY

Aligator KANK2 -----GLGLGQELLSACTILKRYLET---PNASM-DTKT---RDAYGVVQDGLGLACGQAVEATAVSQRLDTYRAFSPRVLATALNMTDGHGNTALHH

Spotted gar Kank2 TQPEDSTRLESDTLMSACTIVLQKALGE---PNAFS-QQEA---RTAYTTVLQEWLRLACRSDAHPELVRRHLVTFRAMSARLLDYVNLADSNNGNTALHY

Cave fish Kank2 VAAQQEIRGELSESLMTALQTLQKALGE---PNAFS-QQGA---RTAYTTVLQEWLRLACRSDAHPELVRRHLVTFRAMSARLLDYVNLADSNNGNTALHY

Herring Kank2 -----KLELSESLITALHTLQKALGE---PNAFS-QQEA---RTAYTTVLQEWLRLACRSDAHPELVRRHLVTFRAMSARLLDYVNLADSNNGNTALHY

Zebrafish Kank2 PTNKQTDSELSGGLMSALHILQKALGE---PNAFS-HQDA---RTAYTTVLQEWLRLACRSDAHPELVRRHLVTFRAMSARLLDYVNLADSNNGNTALHY

Tetradon Kank2 DAPAKPVRVELSDGLMSALHILQKALGE---PNAFS-HQAA---RAAYTTVLQEWLRLACRSDAHPELVRRHLVTFRAMSARLLDYVNLADSNNGNTALHY

Fugu Kank2 SEKANPVRVELSDGLMSALHILQKALGD---PNAFS-HQEA---RAAYTTVLQEWLRLACRSDAHPELVRRHLVTFRAMSARLLDYVNLADSNNGNTALHY

Medaka Kank2 AASSNQVRAELSKNLSALQTLRQKALGE---PNAFS-QQAA---REAYTTVLQEWLRLACRSDAHPELVRRHLVTFRAMSARLLDYVNLADSNNGNTALHY

Sticklebac Kank2 AAPPKQVRDLSDSLMSTLHALQKALGE---PNAFS-QQGA---RAAYTTVLQEWLRLACRSDAHPELVRRHLVTFRAMSARLLDYVNLADSNNGNTALHY

Tilapia Kank2 LN-----RLELSDSLMLALHALQKALGE---PNAFS-QQGA---RAAYTTVLQEWLRLACRSDAHPELVRRHLVTFRAMSARLLDYVNLADSNNGNTALHY

Amazon molly Kank2 -----RLELSESLMSALYTLQKALGE---PNAFS-QQAA---RTAYTTVLQEWLRLACRSDAHPELVRRHLVTFRAMSARLLDYVNLADSNNGNTALHY

Platyfish Kank2 QESSKPVRELESESLMSALYTLQKALGD---PNAFS-QQAA---RTAYTTVLQEWLRLACRSDAHPELVRRHLVTFRAMSARLLDYVNLADSNNGNTALHY

Coelacanth KANK2 TEQ----KFQMSSELLSASMTLQKYLEN---PDAVS-NMAM--KAAAYATVLDWLRI SCHKAADQNVVRHHMIVFQAMSPQLLEFVVMADGNGNTALHY

Anole lizard KANK2 KEQPSTTGMVLSKELLACEVLQKYLEN---PNAHM-DEEM--KLAYTTVLPYWLRLSCHKEADPELVSLHLAAFRISPDLLEFIINMADANGNTALHY

Turtle KANK2 AAPGSGTGTGLSPPELLAACETLQKYLEN---PDMLM-DKEM--KAAATVLDWLQLSCHREAAPEAVGGHLLAAYRALSPRLLEFVLNMDGNGNTALHY

Tetradon Kank1b CNILFHFRCKLSEKMFSAQALKVHLS---SRALS-SREL--LDCLQTVQEWFSVSSQKSAPDVTVDTYLSAFRVSVPVQLQHIANMADGNGNTALHY

Medaka Kank1b -----RYRLNEKMFSAQILKHLSE---ATPLS-NKEL--QECLHTTISQEWFSVSSQKSAPDVTVDKYLMSFELISTSVLQHIANMADGSGNTALHY

Amazon molly Kank1b SRQH---RCNLSERMFSAQALKHLS---NPAMS-SREL--QDCLCSLQEQWFSVSSQKSAPDIVGEYLSAFRMISSPSVLQHIVNMADSNNGNTALHY

Platyfish Kank1b TQH---RCNLSERMFSAQDLKMLHSE---NPATS-SREL--QDCLRSLQEQWFSVSSQKSAPDVTGGEYLSAFRMISSPSVLQHVVNMADGNGNTALHY

Frog Kank4 VTQ---RCTVSDAFRSECQKLSKHLG---LQGT-NDQL--RQTLTYTCQEWFRVSSQKTSSSDLVTIVYLEELRSICPQLLQMVNMSDENNGNTALHY

Zebrafish Kank1b IRG-----IDLVRRC-FLRAKLSR---FTSMA-ARPY----PIENI-----QKRVCPOIVEDFLFACCQVSPDVLQCYVANMPDQNGNTALHY

Tilapia Kank1b IRG-----IDLVRRC-FLRAKLSR---FTSMA-ARPY----PIENI-----QKRVCPOIVEDFLFACCQVSPDVLQCYVANMPDQNGNTALHY

Fugu Kank1b IRG-----IDLVRRC-FLRAKLSR---FTSMA-ARPY----PIENI-----QKRVCPOIVEDFLFACCQVSPDVLQCYVANMPDQNGNTALHY

Cavefish Kank1b RRE---KYEMSEKVLSCYCHSLKAHLNG---SKALS-NREL--RSCLNTIQEQWFRVSSQKACPDTVEDFLCLCRHVSPAVLTHVANMADQNGNTALHY

Spotted gar Kank4 ILHHLHFRETVDDEFMAACLFLKDLHSE---VISPSREL--RQVLSVVCYEWFRVSSQKSAQHALLALYLQELKAVSPLEVLFIINSADGNGNTALHY

Coelacanth KANK4 KTE---RVQIGEDFLAACLKLLSHHLS---IRTTT-DRQL--QOQLNTLQHDWFRVSSQKLSVPEPEVEDYLKFKFSISLELMLIMNIADGNGNTALHY

Frog Kank1 IRE---RYELSEKMLSACNVLKDVTSD---PKALA-NKDV--RLCLTTVQNEWFRVSSQKSAPVPMVEDYITAFKDLSPAVLSYIINMADGNGNTALHY

Shark Kank1 IRE---RYELSEKMLVSAKLLKSQLCD---PKAMA-SKAV--RLCLNSVQHEWFRVSSQKSAPVPMVEDYITAFKDLSPAVLSYIINMADGNGNTALHY

Coelacanth KANK1 IRE---RYELSEKMMSCSVLKNNSID---PKALT-SKDV--RACLNTIQEQWFRVSSQKSAPVPMVGDYLAALFKGVSPDVLRYVVNMADGNGNTALHY

Mouse KANK1 IRE---RYELSEKMLSACNLLKYNID---PKALA-SKDM--RICLNTLQHEWFRVSSQKSAPVPMVGDYIAAFEAIVSPDVLRYIINMADGNGNTALHY

Rat KANK1 IRE---RYELSEKMLSACNLLKYNID---PKALA-SKDM--RICLNTLQHEWFRVSSQKSAPVPMVGDYIAAFEAIVSPDVLRYIINMADGNGNTALHY

Dog KANK1 IRE---RYELSEKMLSACHLLKNNIND---PKALT-SKDM--RFCLNTLQHEWFRVSSQKSAPVPMVGDYIAAFEAIVSPDVLRYIINMADGNGNTALHY

Human KANK1 IRE---RYELSEKMLSACNLLKNTIND---PKALT-SKDM--RFCLNTLQHEWFRVSSQKSAPVPMVGDYIAAFEAIVSPDVLRYIINMADGNGNTALHY

Anole lizard KANK1 IRE---RYELSEKMLSACNLLKNSIDD---PKAMN-SKET--RFCLNTIQHEWFRVSSQKSAPVPMVGDYIAAFEEVSPVLRHIINMADGNGNTALHY

Eagle KANK1 IRE---RYELSEKMLSACHLLRNNIDD---PKALT-NKDV--RFCLNTIQHEWFRVSSQKSAPVPMVGDYITAFEEISPAVLRHIINMADGNGNTALHY

Chicken KANK1 IRE---RYELSEKMLSACHLLKNNIDD---PKALT-NKDV--RFCLNTIQHEWFRVSSQKSAPVPMVGDYITAFEEISPAVLRHIINMADGNGNTALHY

Goose KANK1 IRE---RYELSEKMLSACHLLKNNIDD---PKALT-NKDV--RFCLNTIQHEWFRVSSQKSAPVPMVGDYITAFEEISPVTLRHVINMADGNGNTALHY

Turtle KANK1 IRE---RYELSEKMLSACNLLKNSLDD---PKALA-SKDM--RFCLNTLQHEWFRVSSQKSAPVPMVGDYIAAFEEELSPVLRHIINMADGNGNTALHY

Aligator KANK1 TRE---RYELSEKMLSACNLLKNNIDD---SKAMA-TKDM--RFCLNTIQHEWFRVSSQKLAIVPEMVGDIYIAAFREVSSTVLRHIINMADGNGNTALHY

Spotted gar Kank1 IRE---RYELSEKMLSACTVLRNHLND---SKALT-SKEV--RACLNTIQHEWFRVSSQKSALPAMVEDYLSAFREVSFAVLRHIINMADGNGNTALHY

Herring Kank1 RRE---RYELSEKMLVSAACNVLKAHLND---SKSLT-SKDV--RASLNTVQEQWFRVSSQKSAPVPMVEDYLAALFKGVSSSVLRHVNMADGNGNTALHY

Zebrafish Kank1a -----RYELSEKMLAACNLLKNSLND---PKALS-SKDV--RACVNTVQHEWFRVSSQKTAVAEMVEDYLSAFRDISPALLQHIVNMADGNGNTALHY

Cave fish Kank1a TRE---RYELSEKMLAACNVVKAHLND---PKASS-SKEV--RMCMTVQHEWFRVSSQKTAVATMVEDYLSAFRDISPALLKHVVNLADGNGNTALHY

Stickleback Kank1a CVH---RYSLEKMLSATNVLRAHLS---PKAVS-SKDL--RTCINTVQHEWFRVSSQKSAPVPMVGDYLAALFAGVSPAVLRHVNMADGNGNTALHY

Medaka Kank1a -----SYELSEKMAVACGVLKAHLDD---PNAVS-GKDL--RACINTLQHEWFRVSSQKALAAMVDDYLRFRFEAVSPAVLRHIINMADGNGNTALHY

Fugu Kank1a IRE---RYKPSKMLAACNLLKNSLND---PKAVG-SKDL--RACVNTVQHEWFRVSSQKTAALAMVEDYLSAFRDISPDLVHHIANMADGNGNTALHY

Tetradon Kank1a -----RYKPSKMLAACSVLSAHLCD---SKAVS-SKDL--RACVNTVQHEWFRVSSQKTAALATMVEDYLSAFRDISPDLVHHIANMADGNGNTALHY

Tilapia Kank1a TRE---RYELSEKMLAACNVLKSLSHLS---PKAVT-SKDL--RGCLNTVQHEWFRVSSQKAAVAAMVEDYLSAFRDISPDLVHHIANMADGNGNTALHY

Amazon molly Kank1a SENEKRERYELSEKMLAACDVLKTHLS---SKAVS-SKDL--RASLNTVQHEWFRVSSQKALAPMVEDYLRFFEAIVSMDVLRHVNMADGNGNTALHY

Mouse KANK3 -----RCELNPRLEACIALNQQLNR---PRGVT-SRDG---NAARLVAQEWFRVSSQKQAEVAGVLRGVKSLGPELLAHVVNLADGNGNTALHY

Rat KANK3 GREG---RCELNPRLEACIALNQQLMR---PRGVT-SRDG---NAARLVAQEWFRVSSQKQAEVAGVLRGVKSLGPELLAHVVNLADGNGNTALHY

Dog KANK3 AQQ---RCELSPRLEACAALQQLSR---PRGV-ARDG---GAARLVAQEWFRVSSQKQAEVAGVLRGVKSLGPELLAHVVNLADGNGNTALHY

Human KANK3 PQQVAQGRCELSPRLEACVALQQLSR---PRGVA-SDGG---AVRVAQEWFRVSSQKQAEVAVARMLGVRRLGPELLAHVVNLADGNGNTALHY

Lamprey EQELCHCRYEMSESMHTACSTLKAHLED---HKSLN-TKEV-----VMADGNGNTALHY

Coelacanth KANK3 VKE---KFELSPKMREACLILKNHND---ADTSR-SKDV--MSSVNLVQEQWFLVSSQKTSFSETVADYLMFAEISPALLGYVNMDSGNGNTALHY

Frog Kank3 TQHDTKKSCVLSQKMQEACLVS IHLCE---PNAVK-TKQS--LASSHIVQEQWFRASSQKSSVAETVAAYLKAFMDISPMLSHVVNLTDGNGNTALHY

Turtle KANK3 VKE---KFELSPRMREACMIVKSHLSH---PSAVK-SKEV--LASSSILQEQWFRVSSQKSVPPELVASHLLAFAEVSPGMLAHVVNLSDGNGNTALHY

Aligator KANK3 VKE---KFELSPRMREACMIVKSHLSH---PSSAK-SKEV--LSSSSILQEQWFRVSSQKSSVSEEMVANHLMFAETVSPALLTHVINLSDGNGNTALHY

Eagle KANK3 VKE---KFELSPRMREACLIVKTHLGH---PSATK-SKEV--LASSSIVLQEQWFRVSSQKSSIPDVTANHLLAFAEVSPALLAHVVNLADGNGNTALHY

Chicken KANK3 VKE---KFELSPRMREACLIVKTHLGH---PTATK-SKEV--LASSSIVLQEQWFRVSSQKSSVPDVTANHLLAFAEVSPALLTHVVNLADGNGNTALHY

Goose KANK3 VKE---KFELSPRMREACLIVKTHLGH---PGATK-SKEA--LASSSIVLQEQWFRVSSQKSSVPDVTANHLLAFAEVSPALLAHVVNLADGNGNTALHY

Spotted gar Kank3 VKE---KFELSKMREACLILKNHND---DINALK-SKEV--LSSTHTVQEQWFRVSSAKTALPSRVADYLMFAFSEVSPALLRHVVNMNTDSGNGNTALHY

Zebrafish Kank3 VKE---KFELSKMREACLILKNHND---GEKAVK-SKEV--LSSSTHTVQEQWFRVSSAKMAQPLRVSNYLMFAFSEVSPVLLLEHVNMNTDNGNTALHY

Cavefish Kank3 VKE---KFELSKMREACLILKNHND---GAKAAK-SKEL--LSSTHTVQEQWFRVSSAKMSQPTRVSNYLMFAFSEVSPVLLGHVVNMNTDNGNTALHY

Herring Kank3 VKE---KFELSMKREACLILKNHND---DAKAMK-SKEV--LSSTHTVQEQWFRVSSAKAAQPLRVSNYLMFAFSEVSPVLLLEHVNMNTDNGNTALHY

Stickleback Kank3 CDAVKENRFELSKMREACLILKNHLD---DIAALKICHPK--LSSTHTVQEQWFRVSSAKMAQSPRVSDYLMFAFSEVSSALLEHVNMNTDNGNTALHY

Fugu Kank3 VKENF---REFSSKMREACLILKNHND---DARAPK-SKEV--LSSTHTVQEQWFRVSSAKTAQPSRVSDYLMFAFSEVSPVLLLEHVNMNTDNGNTALHY

Tetradon Kank3 VKE---KFEFSGKMREACLILKNHND---EAKALR-SKEV--LSSTHTVQEQWFRVSSAKTAQPSRVSDYLMFAFSEVSPVLLLEHVNMNTDNGNTALHY

Medaka Kank3 VKE---KFEFSSKMREACLILKNHND---DVTTLK-SKEV--LSSTHTVQEQWFRVSSAKTAQPSRVSDYLMFAFSEVSSALLEHVNMNTDNGNTALHY





Sticklebacc Kank2 TVSHSNFPPVVKLLLDTTGLCNADKQNKAGYTAIMLTALAAAFH-SDNDLQTVLQQLLRTGDVNAKAS-QAGQTAI MLAVSHGRGDMVRALLSCGAQVNI RDD  
Tilapia Kank2 TVSHSNFPPVVKLLLD-TGLCNADKQNKAGYTAIMLTALAAAFH-SDSDLQTVLQQLLRTGDVNAKAS-QAGQTAI MLAVSHGRGDMVRALLSCGAQVNI RDD  
Amazon molly Kank2 TVSHSNFPPVVKLLLD-TGLCNADKQNKAGYTAIMLTALAAAFH-SDSDLQTVLQQLLRTGDVNAKAS-QAGQTAI MLAVSHGRGDMVRALLSCGAQVNI RDD  
Platyfish Kank2 TVSHSNFPPVVKLLLD-TGLCNADKQNKAGYTAIMLTALAAAFH-SDSDLQTVLQQLLRTGDVNAKAS-QAGQTAI MLAVSHGRGDMVRALLSCGAQVNI RDD  
Coelacanth KANK2 TVSHSNFPIVRLLE-TGMCNVDPQNKAGYTAIMLTALAAAFR-SEGDMETVTVQLLHHGNVNAKAS-QAGQTAI MLAVSHGRIDMVKALLAGGADVNLQDD  
Amazon lizard KANK2 TVSHSNFPPVAKLLE-TGLCHVDQNKAGYTAIMLALAAASR-SESDMTVTVQLLHGMGNVNAKAS-QAGQTAI MLAVSHGRIDMVRALLASSADVNLQDD  
Turtle KANK2 TVSHSNFPPVQRLE-TGLCNVDKQNKAGYTAIMLTALAAATR-SDDDMAIIRQLLQGLDVNAKAS-QAGQTAI MLAVSHGRQDMVRALLACAADVNLQDA  
Tetradon Kank1b SVSHSNFQIVQKLE-ADV CNMNHQNKAGYTPIMLALAAAVE-SPDDMKVVEQLFRKGDVNAKAS-QAGQTAI MLAVSHGRVGMVRALLELGADVNLQDD  
Medaka Kank1b SLSHSNFEEVVKLLD-AGVCNVNLQNAAGYTPIMLALAAAVE-NPDDMRVVEKLFAGGNVNAKAS-QAGQTAI MLAVSHGRDMVETLLAQGADVNI RDD  
Amazon molly Kank1b SVSHSNFQVVKLLD-AEVCNVNQNAAGYTPVMLALAAAVE-RPDDMRVVEQLFSGGDVNAKAI-QAGQTAI MLAVSHGRIDMVRALLAQGAEVNI QDD  
Platyfish Kank1b SVSHSNFQVVKLLD-AEVCNVNQNAAGYTPVMLALAAAVE-RPDDMRVVEQLFSTGDVNAKAI-QAGQTAI MLAVSHGRIDMVRALLAQGAEVNI QDD  
Frog Kank4 SVSHSNFIVKLLK-TGVCVYDQNKAGYTPVMLTVAATE-TDEDMEVVLTLTEGNVLCAT-QGRQTSI MLAVSHGRIDMVTVLLNCGADVNLQDE  
Zebrafish Kank1b SVSHSNFVVKVLLA-AGVCNIDHQNKAGYTPIMLASAAVE-TKEDMIVVQELFSRGDVNAKAS-QAGQTAI MLAVSHGRIDMVQALLAAGAEVNI QDD  
Tilapia Kank1b SVSHSNFVVKVLLA-AGVCNIDHQNKAGYTPIMLASAAVE-TKEDMIVVQELFSRGDVNAKAS-QAGQTAI MLAVSHGRIDMVQALLAAGAEVNI QDD  
Fugu Kank1b SVSHSNFVVKVLLA-AGVCNIDHQNKAGYTPIMLASAAVE-TKEDMIVVQELFSRGDVNAKAS-QAGQTAI MLAVSHGRIDMVQALLAAGAEVNI QDD  
Cavefish Kank1b SVSHSNFRVVKLLD-ADV CNIDQNKAGYTPIMLALAAAVE-TQEDMRVVEQLFSGGDVNAKAI-QAGQTAI MLAVSHGRDMVVKVLLASGSTVNVQDD  
Spotted gar Kank4 SVSHSNFRIVKLLD-TGLCKVDHQNKAGYTAIMLASLTAAD-SREDMDVALQLLQGDINTRAS-QAGQTAI MLAVSHGRIDMVRLLLSCNADVNAQDD  
Coelacanth KANK4 SVSHSNFQIVKLLD-TGVCVDVQNKAGYTPIMLALAAATE-TKEDMIVVQELFSRGDVNAKAI-QAGQTAI MLAVSHGRFDMVKALLSCGADLNLQDD  
Frog Kank1 SVSHSNFDIVKLLD-ADV CNVQNKAGYTPIMLALAAAVE-APKDMGVVEELFGSGDVNAKAS-QAGQTAI MLAVSHGRIDMVRALLACGADVNI QDD  
Shark Kank1 SVSHSNFEIVKMLD-ANVCNVNQNKAGYTPIMLALAAAVE-TEKMKIVDELFSQGDVNAKAS-QAGQTAI MLAVSHGRDMVVKALLLCAADVNI QDD  
Coelacanth KANK1 SVSHSNFEIVKLLD-AG-----  
Mouse KANK1 SVSHSNFQIVKLLD-ADV CNVDHQNKAGYTPIMLALAAAVE-AEKDMQVVEELFSCGDVNAKAS-QAGQTAI MLAVSHGRIDMVKGLLACGADVNI QDD  
Rat KANK1 SVSHSNFQIVKLLD-ADV CNVDHQNKAGYTPIMLALAAAVE-AEKDMQVVEELFSCGDVNAKAS-QAGQTAI MLAVSHGRIDMVKGLLACGADVNI QDD  
Dog KANK1 SVSHSNFEIVKLLD-ADV CNVDHQNKAGYTPIMLALAAAVE-AQKDMRVVEELFGCGDVNAKAS-QAGQTAI MLAVSHGRIDMVKGLLACGADVNI QDD  
Human KANK1 SVSHSNFEIVKLLD-ADV CNVDHQNKAGYTPIMLALAAAVE-AEKDMRIVEELFGCGDVNAKAS-QAGQTAI MLAVSHGRIDMVKGLLACGADVNI QDD  
Anole lizard KANK1 SVSHSNFEIVKLLD-ANVCNVNHQNKAGYTPIMLALAAAVE-TKEDMIVVQELFSRGDVNAKAS-QAGQTAI MLAVSHGRIDMVKALLACRADVNI QDD  
Eagle KANK1 SVSHSNFEIVKLLD-ANVCNVNHQNKAGYTPIMLALAAAVE-AEKDMRIVEELFSCGDVNAKAS-QAGQTAI MLAVSHGRIDMVKALLACGADVNI QDD  
Chicken KANK1 SVSHSNFEIVKLLD-ANVCNVNHQNKAGYTPIMLALAAAVE-AEKDMRIVEELFSCGDVNAKAS-QAGQTAI MLAVSHGRIDMVKALLACGADVNI QDD  
Goose KANK1 SVSHSNFEIVKLLD-ANVCNVNHQNKAGYTPIMLALAAAVE-AEKDMRIVEELFSCGDVNAKAS-QAGQTAI MLAVSHGRIDMVKALLACGADVNI QDD  
Turtle KANK1 SVSHSNFEIVKLLD-ANVCNVNHQNKAGYTPIMLALAAAVE-AEKDMRIVEELFSCGDVNAKAS-QAGQTAI MLAVSHGRIDMVKALLACGADVNI QDD  
Aligator KANK1 SVSHSNFEIVKLLD-ANVCNVNHQNKAGYTPIMLALAAAVE-AEKDMRIVEELFGCGDVNAKAS-QAGQTAI MLAVSHGRIDMVKALLACGADVNI QDD  
Spotted gar Kank1 SVSHSNFEIVKLLD-ADV CNVQNKAGYTPIMLALAAAVE-AEKDMQVVEELFGKGDVNAKAS-QAGQTAI MLAVSHGRDMVVKALLACRADVNI QDD  
Herring Kank1 SVSHSNFDIVKLLD-ADV CNVQNKAGYTPIMLALAAAVE-SPKDMHIVEELFSKGDVNAKAS-QAGQTAI MLAVSHGRDMVVKALLACGADVNI QDD  
Zebrafish Kank1a SVSHSNFHIVKLLLE-ADV CNVQNKAGYTPIMLALAAAVE-APKDMRVVEELFSKGDVNAKAS-QAGQTAI MLAVSHGRDMVVKALLACGADVNI QDD  
Cave fish Kank1a SVSHSNFHIVKLLD-ANVCNVNHQNKAGYTPIMLALAAAVE-APKDMRVVEELFSKGDVNSKAS-QAGQTAI MLAVSHGRDMVVKALLACGADVNI QDD  
Stickleback Kank1a SVSHSNFIVVKELLD-AGEGGRGGKGAAGHTPIMLALAAAVE-SPKDMRIVEELFSKGDVNAKAS-QAGQTAI MLAVSHGRDMVVKALLACGADVNI QDD  
Medaka Kank1a SVSHSNFQVVKLLD-ADV CNVQNKAGYTPIMLALAAAVE-TPKDMSVVEELFGKGDVNAKAS-QAGQTAI MLAVSHGRDMVVKALLACGADVNI QDD  
Fugu Kank1a SVSHSNFHIVKLLD-ADV CNVQNKAGYTPIMLALAAAVE-TPKDMRVVEELFSKGDVNAKAS-QAGQTAI MLAVSHGRDMVVKALLACGADVNI QDD  
Tetradon Kank1a SVSHSNFHIVKLLD-ADV CNVQNKAGYTPIMLALAAAVE-TPKDMRVVEELFSKGDVNAKAS-QAGQTAI MLAVSHGRDMVVKALLACGADVNI QDD  
Tilapia Kank1a SVSHSNFQVVKLLD-ADV CNVQNKAGYTPIMLALAAAVE-TPKDMRIVEELFSKGDVNAKAS-QAGQTAI MLAVSHGRDMVVKALLACGADVNI QDD  
Amazon molly Kank1a SVSHSNFQVVKLLD-ADV CNVQNKAGYTPIMLALAAAVE-TAKDMRIVEELFSKGDVNAKAS-QAGQTAI MLAVSHGRDMVVKALLACGADVNI QDD  
Mouse KANK3 SVSHGNLAISSLLD-TGVCVDVNHQNRAGYSALMLAALTSVQEEEDMAVVQRLFSMGNVNAKAS-QTGQTAI MLAI SHGHQDMVAALLECCGADVNI QDA  
Rat KANK3 SVSHGNLAISSLLD-TGVCVDVNHQNRAGYSALMLAALTSVQEEEDMAVVQRLFSMGNVNAKAS-QTGQTAI MLAI SHGHQDMVAALLECCGADVNI QDA  
Dog KANK3 SVSHGNLAISSLLD-TGVCDDIDRQNRAGYSALMLAALTSVQEEEDMAVVQRLFHLGNVNAKAT-QTGQTAI MLAI SHGRQDMVAALLSCGADVNAQDA  
Human KANK3 SVSHGNLAIASLLD-TGACEVNRQNRAGYSALMLAALTSVQEEEDMAVVQRLFCMGNVNAKAS-QTGQTAI MLAI SHGRQDMVAATLLACGADVNAQDA  
Lamprey SVSHSNFAIVQMLLDTGECNVDAQNKAGYTAIMLASLAIN-SERDMAVVQRLSLGDVNAKASQAGQTAI MLAVSHGRKDMVRALLACGADVNI QDD  
Coelacanth KANK3 SVSHSNFHVKLLLE-TGVCNVDRQNKAGYTAIMLALAAAVE-IDEDMRVVRLLFSMGNVNAKAS-QAGQTAI MLAVSHGRIMVVRALLDCGADVNI QDD  
Frog Kank3 SVSHSNFFIVQLLD-TGVCNVDRQNKAGYTAIMLALAAAVE-KEDDMNVVSRFLSGGNVNAKAS-QAGQTAI MLAVSHGRQEMVQALLACGANVNI QDD  
Turtle KANK3 SVSHSNFQIVQLLD-TGVCNVDRQNKAGYTAIMLALAAAVE-HEEDMNVVRRFLFSMGNVNAKAS-QAGQTAI MLAVSHGRQEMVEALLACGADVNI QDE  
Aligator KANK3 SVSHSNFQIVRLLD-TGVCNVDRQNKAGYTAIMLALAAAVE-HEEDMNVVRRFLFSMGNVNAKAS-QAGQTAI MLAVSHGRQEMVEALLACGADVNI QDE  
Eagle KANK3 SVSHSNFHIVRLLD-TGVCNVDRQNKAGYTAIMLALAAAVE-QEDDMNVVRRFLFSMGNVNAKAS-QAGQTAI MLAVSHGRQEMVEALLACGADVNI QDE  
Chicken KANK3 SVSHSNFHIVKLLD-TGVCNVDRQNKAGYTAIMLALAAAVE-QEDDMNVVRRFLFSMGNVNAKAS-QAGQTAI MLAVSHGRQEMVEALLACGADVNI QDE  
Goose KANK3 SVSHSNFHIVQLLD-TGVCNVDRQNKAGYTAIMLALAAAVE-QEDDMNVVRRFLFSMGNVNAKAS-QAGQTAI MLAVSHGRQEMVEALLACGADVNI QDE  
Spotted gar Kank3 SVSHSNFTVVGLLD-TGVCNVDRQNKAGYTAIMLALAAAVE-EEDDMRVVRLKFLSGVNAKAS-QFSQTIQVLA VKMGSIDDL-FLLSTVNLV SFHKD  
Zebrafish Kank3 SVSHSNFAVVDLLD-TGMCNVQNKAGYTAIMLALAAAVE-EEDDMRVVRLKFLSGVNAKAS-QAGQTAI MLAVSHGRQEMVRALLDCGANVNI QDD  
Cavefish Kank3 SVSHSNFTVVGLLD-TGKCNVDQNKAGYTAIMLALAAAVE-EEDDMRVVVKLFSQGNVNAKAS-QAGQTAI MLAVSHGRQEMVRALLECCGADVNI QDD  
Herring Kank3 SVSHSNFVVGLLD-TGVCNVQNKAGYTAIMLALAAAVE-EEDDMRVVVKLFSQGNVNAKAS-QAGQTAI MLAVSHGRQEMVRALLECCGANVNI QDD

Stickleback Kank3 SVSHSNFVSVGLLLD-TGLCRVDKQNKAGYTAIMLAALSTVK-EEKDMAVVKRLFSQGNVNAKAS-QAGQ TALMLAVSHGRQEMVRALLECGADVNVQDD  
 Fugu Kank3 SVSHSNFVSVGLLLD-TGVCSVDKPNKAGYTAIMLAALSTVKEEEDM VVVVKLFQCGNVNAKAS-QAGQ TALMLAVSHGRQEMVRALLECGADVNVQDD  
 Tetradon Kank3 SVSHSNFVSVGLLLD-TGVCSVDKPNKAGYTAIMLAALSTVKEEEDM GVVVKLFQCGNVNAKAS-QAGQ TALMLAVSHGRQEMVRALLECGADVNVQDD  
 Medaka Kank3 SVSHSNFHVRLLLD-TGVCCVDKQNKAGYTAIMLAALSTVK-EEEDMAVVRKLFSGGNVNAKAS-QAGQ TALMLAVSHGRQEMVRALLECGADVNVQDD  
 Tilapia Kank3 SVSHSNFVSVGLLLD-TGVCSVDKQNKAGYTAIMLAALSTVK-KEEDM VVVVKLFSGGNVNAKAS-QAGQ TALMLAVSHGRQEMVRALLECGADVNVQDD  
 Amazon molly Kank3 SVSHSNFVSVRLLLD-TGVCCVDKQNKAGYTAIMLAALSTVKEEEDMAVVKLFGQGNVNAKAS-QAGQ TALMLAVSHGRQEMVQALLECGADVNVQDD  
 Platyfish Kank3 SVSHSNFVSVQLLLD-TGVCCVDKQNKAGYTAIMLAALSTVK-EEEDMAVVKLFGQGNVNAKAS-QAGQ TALMLAVSHGRQEMVQALLECGADVNVQDD

2910 2920 2930 2940 2950 2960 2970 2980 2990 3000

Hydra DGATALMCACDHGNVNIVKTLGPN-PCDVTI EDN-----  
 Trichoplax DGSTALMTACEHGLKDIVKLLLAQ-PNINVTTLDY-----DNYDAL S-IAMGNFKDCGILLYSYI-----  
 Aplasia DGSTALMCACEHGHM DIVSYLLSQ-PNIDANLMDN-----ENSTALT-IAMEAGHKDVGVVLYKHL-NFSTK---ASSP-----  
 Snail DGSTALMCACEHGHLEIVKLLLSQ-PNIDAKITDN-----ENSTALS-IAMEAGHKDVGVVLYKHL-NFS-K---PTSP-----  
 Fruitfly DGSTALMCAA EHG RVDVIKHLSSH-PECD SLVTDV-----DGSTAFK-IAWQAGHRDVGLLIYVHE-QML-R---SKLP-----  
 Hookworm EGSTALMCAA EHG HKDIVKLLLAQ-PGDAAL TDC-----DSS TALS-IAVENGRHDIGVLIYAHL-NYS-R-----  
 C.elegance DGSTALMCAA EHG HKELVKMLLAE-NLVNASLTDV-----DNSTALS-IALENDHREIGVMIYAYL-NYG-----  
 Tunicate DGSTPLMCAVEHGGQIEIVKLLLNH-PMCDAAAKDS-----DGSTAMN-IAMDAGHREIAILLYAQL-NFK-P-----NS--  
 Spider DGSTALMCAA EHG HLEIVKLLLSH-PECDPTIVDN-----DECNALT-IAMEAGHKDIGLLIYT NM-NFS-R---GSSPYSTLKNRKRSTPRS  
 Lingula DGSTALMCASEHGHSEIVRLLLSM-AECDASLADN-----DGSTALS-IAMEAGHKDIGILLYARQ-NIK-S---SPGL---AR--  
 Lancelet DGSTALMCASEHGHLEIVKLLLAQ-PGCDATITDN-----DDSTALS-IAMEAGHRDIGVLLYAQV-NMG-K-----  
 Medaka Kank4b QGTTALMFASERGH THIVARLLER-SQCDLTLTDK-----RCRTALS-IALQGSHTDAALLQAHA---K---ARAL-----  
 Amazon molly Kank4b QGTTSLMFASERGH THIVARLLER-SQCDLTLTDK-----VRLQPTAKSSSGLSQSTT-----  
 Platyfish Kank4b QGTTSLMFASERGH THIVARLLER-SQCDLTLTDK-----RGQTALS-IAKQGSHTDAALLQAHA---K---ARAL-----  
 Stickleback Kank4b QGTTALMFASERGH THIVARLLER-SRCDLTLTDK-----RGQTALS-IAMQGSHTDAALLQAHA---K---ARAL-----  
 Fugu Kank4b QGTTALMFASERGH THIVARLLER-SQCDLTLTDK-----RCRTALA-IAMQGSHTDTATLLQAHA---K---VRAL-----  
 Tetraon Kank4b QGTTALMFASERGH THIVARLLER-SHCDLSLTDK-----V-----R-----  
 Cave fish Kank4b PPNPPKTC-----PH-NAPLAPD-----  
 Medaka Kank4a EGSTALMCASEHGH THIVRLLLET-GRCNASLTDK-----NGRTALS-AAEEAFHQDIAELL---R-----  
 Fugu Kank4a EGSTALMCASEHGH THIVGLLLET-GRCDSLTDK-----NGQTAQK-VAAGSSHQDIVDLLKAHA---K-----  
 Tetradon Kank4a EGSTALMCASEHGH AHIVGLLLET-GRCDSLADK-----NGQTAQK-VAEGASHQDIIDLKAHA-----  
 Stickleback Kank4a EGSTALMCASEHGH TNIVRMLLET-GRCDSLTDK-----NGQTARS-VAEGA AHQDIRDLKAHA---E-----  
 Tilapia Kank4a EGSTALMCASEHGH THIVRLLLET-GRCDSLTDK-----NGQTALL-VAEGASQDIDLKANA---E-----  
 Platyfish Kank4a EGSTALMCASEHGH THIACLLLET-GRCDSLTDK-----NGQTALS-VAEAAAHQDIIDLKSHA-----  
 Amazon Molly Kank4a EGSTALMCASEHGH THIACLLLET-GHCDIGLTDK-----NGQTALS-VAEAAAHQDIIDLKSHA-----  
 Herring Kank4 DGSTALMCACEHGHAEI TRMLLKHPPGCDTSLKDK-----DGHTALS-VATQASHMEVIDLLKAHT-GTP-----  
 Zebradish Kank4 DGSTALMCACEHGHTEIAKILLER-PGCDLTLTDK-----DGHTALS-VAMKASHT EIDLNLARS---DPGP-----  
 Cave fish Kank4a DGSTALMCASEHGHAEIAKLLLDV-SQCDLTDK-----AGHTALS-VAIKASHPEIVDLLKAHA-----  
 Mouse KANK4 DGSSALMLACHQGNADLVRLLLAH-PACNSSLTDK-----AGRTALSIVLNSPAHVEIAELLRAHS-EPG-----  
 Rat KANK4 DGSSALMLACHQGNADLVRLLLAH-ADCNSLTDK-----AGQTALSIVLNSPAHVEIAELLRAHS-EQG-----  
 Dog KANK4 EGSSALMLACHRHGNADMVRLLLAH-PACDSSLTDK-----AGRTALSIVLNSPAHVEIAELLRAHA-EQG-R---SLGP-----  
 Human KANK4 DGSSALMVACHHGNVDLVRLLAH-PACDSSLTDK-----AGRTALSIALKSPHMEIAGLLRAHA-EQG-R---SLGL-----  
 Eagle KANK4 EGT TALMVACRQGNADIVRLLLAQ-PGCVQVLTDK-----GGNSALS---LARRG DIAALLRAHA-----  
 Chicken KANK4 QGSTALMVACRQGSTDMVRLLLAQ-PGQQLALTDK-----DGD TALS-IAQRSAHEDIAALLHSAQ---H---GFND-----  
 Goose KANK4 HGT TALMVACRQGNADMVRLLLAQ-PGQQLALTDKLEPTGKRHP SACTE PGRSARSSDPGQVPAGITQAQGD TVMSGQ---TAAP-----  
 Anole lizard KANK4 TGLSPLMVASQYGNMDIVKLLLDH-PGCDTTLNDK-----AGNSALS-MALKSAHVEIAEILQSHK-QHS-W---PLNT-----  
 Turtle KANK4 NGTALMVACQHGNAEIAKLLLAH-PGCDNTLTDK-----GNSALS-VALKSAHMEIAEILQAHK-EQS-R---SLAK-----  
 Aligator KANK4 NGVSALMVACQGNAEIVKFLAH-PDCNATLTDK-----DGNSALS-VALKSAHVEIAEILQAH I-EQS-S---SLSK-----  
 Frog Kank2 DGSTALMCACEHGHADIVSLLLA V-PACDVSLTDN-----DGSTALS-IALEAGQNDIAMLLSAHN-SKI-S---NQDE-----GT--  
 Mouse KANK2 DGSTALMCACEHGHKEITGLLLAV-PSCDISLTD R-----DGSTALM-VALDAGQSEIASMLYSRM-NIK-C---SFAP-----  
 Rat KANK2 DGSTALMCACEHGHKEITGLLLAV-PSCDISLTD R-----DGSTALM-VALDAGQSEIASMLYSRM-NIK-C---SFAP-----  
 Dog KANK2 DGSTALMCACEHGHKEITGLLLAV-PSCDISLTD R-----DGSTALM-VALDAGQSEIASMLYSRM-NIK-C---SFAP-----  
 Human KANK2 DGSTALMCACEHGHKEIAGLLLA V-PSCDISLTD R-----DGSTALM-VALDAGQSEIASMLYSRM-NIK-C---SFAP-----  
 Aligator KANK2 DGSTALMCACEHGHAAIAHLLLA A-PACRVDLADN-----DGSTALS-IAQEAGQTDIVNMT EACL-GAP-A---LGNP-----LP--  
 Spotted gar Kank2 DGSTALMCACEHGHVDIVKQLLA V-PGCDATLTDN-----DGSTALS-IAMEANQNDIAVLLYAHL-NFA-K---PPSP-----VQVL  
 Cave fish Kank2 DGSTALMCACEHGHVDIVRQLLSV-PGCDATLTDN-----DGSTALS-IALEASQNDIAVLLYAHL-NFA-K---PPSP-----VS--  
 Herring Kank2 DGSTALMCACEHGHVDIVRQLLSV-PGCDATLTDN-----DGSTALS-IALEASQNDIAVLLYAHL-NFA-K---PPSP-----VS--

|                     |       |       |                   |                         |            |              |                           |                           |                     |                 |                  |            |                 |
|---------------------|-------|-------|-------------------|-------------------------|------------|--------------|---------------------------|---------------------------|---------------------|-----------------|------------------|------------|-----------------|
| Zebrafish Kank2     | DG    | STALM | CACEHGHVDIVRQLLSV | PGCDATLTDN              | -----      | DG           | STALS                     | -IALEASQNDIAVLLYAHL-NFA-K | ---                 | PPSP            | -----            | VS         |                 |
| Tetradon Kank2      | DG    | STALM | CACEHGHVDIVRQLLSV | PGCDASLTDN              | -----      | DG           | STALS                     | -IALEASQNDIAVLLYAHL-NFA-K | ---                 | PPSP            | -----            |            |                 |
| Fugu Kank2          | DG    | STALM | CACEHGHVDIVRQLLSV | PGCDATLTDN              | -----      | DG           | STALS                     | -IALEASQNDIAVLLYAHL-NFA-K | ---                 | PPSP            | -----            |            |                 |
| Medaka Kank2        | DG    | STALM | CACEHGHVDIVRQLLSV | PGCDATLTDN              | -----      | DG           | STALS                     | -IALEASQNDIAVLLYAHL-NFA-K | ---                 | PPSP            | -----            |            |                 |
| Stickleback Kank2   | DG    | STALM | CACEHGHVDIVRQLLSV | PGCDATLTDN              | -----      | DG           | STALS                     | -IALEASQNDIAVLLYAHL-NFA-K | ---                 | PPSP            | -----            |            |                 |
| Tilapia Kank2       | DG    | STALM | CACEHGHVDIVRQLLSV | PGCDATLTDN              | -----      | DG           | STALS                     | -IALEASQNDIAVLLYAHL-NFA-K | ---                 | PPSP            | -----            |            |                 |
| Amazon molly Kank2  | DG    | STALM | CACEHGHVDIVRQLLSV | PGCDATLTDN              | -----      | DG           | STALS                     | -IALEASQNDIAVLLYAHL-NFA-K | ---                 | PPSP            | -----            |            |                 |
| Platyfish Kank2     | DG    | STALM | CACEHGHVDIVRQLLSV | PGCDATLTDN              | -----      | DG           | STALS                     | -IALEASQNDIAVLLYAHL-NFA-K | ---                 | PPSPVS          | -----            |            |                 |
| Coelacanth KANK2    | DG    | STALM | CACEHGHVEIVRLLLA  | V-PGCDVTLTDN            | -----      | DG           | STALS                     | -VALEANQNEIAMLLHSHM-NLT-K | ---                 | ALAPV           | -----            |            |                 |
| Anole lizard KANK2  | DG    | STALM | CACEHGHAEIVRLLLA  | T-PGCDVALSDN            | -----      | DG           | STALS                     | -IAVEAGQNDIAIMLYAQL-NFA-K | ---                 | STSP            | -----            | GT         |                 |
| Turtle KANK2        | DG    | STALM | CACEHGHAEIARLLLA  | T-PACHVGLADH            | -----      | DG           | STALS                     | -IALEAGQNDIAVMLYAHL-NFA-K | ---                 | PPSP            | -----            | GT         |                 |
| Tetradon Kank1b     | EG    | STALM | CAGEHGHADMVRLLLA  | Q-AHCDATLTD             | S-----     | DG           | STALS                     | -IALEAGHNDIAVLLYAHT-NYS-R | -----               |                 | -----            |            |                 |
| Medaka Kank1b       | EG    | STALM | CASEHGYADIVKLLLA  | Q-PECDATLTD             | S-----     | DE           | STALS                     | -IALEAGHSDIAVLLYAHT-TFS-R | ---                 | QTG             | -----            | AG         |                 |
| Amazon molly Kank1b | EG    | STALM | CASEHGHADIVKLLLA  | Q-PDCDATLTD             | S-----     | DD           | SALS                      | -VALEAGHNDIAVLLYAHA-NFS-R | ---                 | CTA             | -----            | GA         |                 |
| Platyfish Kank1b    | EG    | STALM | CASEHGHADIVKLLLA  | Q-PDCDATLTD             | S-----     | DD           | SALS                      | -VALEAGHNDIAVLLYAHA-NFS-R | ---                 | CTV             | -----            | GA         |                 |
| Frog Kank4          | DG    | E     | TALMACR           | LGNMDLVKLLLAQ           | PGCDTELSDK | -----        | V                         | N                         | TALS                | -IVLNSAHS       | EIAEFLQAHT-EHR-R | -----      |                 |
| Zebrafish Kank1b    | EG    | SSALM | CAGEHGHADIVKLLLA  | Q-PGCDATLTDN            | -----      | DE           | STALS                     | -IALEAGHKDIAMLIYAHV-NYS-K | ---                 | SQPRSQ          | -----            | GS         |                 |
| Tilapia Kank1b      | EG    | SSALM | CAGEHGHADIVKLLLA  | Q-PGCDATLTDN            | -----      | DE           | STALS                     | -IALEAGHKDIAMLIYAHV-NYS-K | ---                 | SQPRSQ          | -----            | GS         |                 |
| Fugu Kank1b         | EG    | SSALM | CAGEHGHADIVKLLLA  | Q-PGCDATLTDN            | -----      | DE           | STALS                     | -IALEAGHKDIAMLIYAHV-NYS-K | ---                 | SQPRSQ          | -----            | GS         |                 |
| Cavefish Kank1b     | EG    | STALM | CASEHGHADIVKLLLA  | Q-PGCDATLSDN            | -----      | DD           | STALS                     | -IALEAGHKDIAMLIYAHV-NYA-K | ---                 | GQ-AM           | -----            | GT         |                 |
| Spotted gar Kank4   | DG    | STALM | CACEHGHADIVRLLLA  | L-PACDASITDN            | -----      | EG           | N                         | SALS                      | -IALEASHTEIVDLLKAHT | -----           | -----            |            |                 |
| Coelacanth KANK4    | TG    | STALM | CACEQGNVEIVKLLLA  | TQ-PCSCVELTDK           | -----      | V            | G                         | N                         | A                   | F               | S                | -IALEVSHK  | IAEELLNAHV-SHC  |
| Frog Kank1          | EG    | STALM | CASEHGHVEIVKLLLA  | Q-HGCNALEDN             | -----      | DG           | SSALS                     | -IALDAGHKDIAVILYAHL-NFS-K | ---                 | TPSP            | -----            | GT         |                 |
| Shark Kank1         | EG    | STALM | CASEHGHAEIVKLLLA  | Q-PGCDATLTDN            | -----      | DE           | STALS                     | -IALDAGHKDIAVLLYAHL-NFS-K | ---                 | AQSP            | -----            | GT         |                 |
| Coelacanth KANK1    | ----- | ----- | -----             | -----                   | -----      | -----        | -----                     | -----                     | -----               | -----           | -----            | -----      |                 |
| Mouse KANK1         | EG    | STALM | CASEHGHVEIVKLLLA  | Q-PGCNGHLEDN            | -----      | DG           | STALS                     | -IALEAGHKDIAVLLYAHL-NFS-K | ---                 | AQSP            | -----            | ST         |                 |
| Rat KANK1           | EG    | STALM | CASEHGHVEIVKLLLA  | Q-PGCSGHLEDN            | -----      | DG           | STALS                     | -IALEAGHKDIAVLLYAHL-NFS-K | ---                 | AQSP            | -----            | ST         |                 |
| Dog KANK1           | EG    | STALM | CASEHGHVEIVKLLLA  | Q-PGCNGHLEDN            | -----      | DG           | STALS                     | -IALEAGHKDIAVLLYAHL-NFA-K | ---                 | APSP            | -----            | GT         |                 |
| Human KANK1         | EG    | STALM | CASEHGHVEIVKLLLA  | Q-PGCNGHLEDN            | -----      | DG           | STALS                     | -IALEAGHKDIAVLLYAHL-NFA-K | ---                 | AQSP            | -----            | GT         |                 |
| Anole lizard KANK1  | EG    | STALM | CASEHGHVEIVKLLLA  | Q-SGCNGTLEDN            | -----      | DG           | STALS                     | -IALEAGHKDIAVLLYAHL-NFS-K | ---                 | TQSP            | -----            | GT         |                 |
| Eagle KANK1         | EG    | STALM | CASEHGHVEIVKLLLA  | Q-PGCNGTLEDN            | -----      | DG           | STALS                     | -IALEAGHKDIAVLLYAHL-NFS-K | ---                 | TQSP            | -----            | GT         |                 |
| Chicken KANK1       | EG    | STALM | CASEHGHVEIVKLLLA  | Q-PGCNGTLEDN            | -----      | DG           | STALS                     | -IALEAGHKDIAVLLYAHL-NFS-K | ---                 | TQSP            | -----            | GT         |                 |
| Goose KANK1         | EG    | STALM | CASEHGHVEIVKLLLA  | Q-PGCNGTLEDN            | -----      | DG           | STALS                     | -IALEAGHKDIAVLLYAHL-NFS-K | ---                 | TQSP            | -----            | GT         |                 |
| Turtle KANK1        | EG    | STALM | CASEHGHVEIVKLLLA  | Q-SGCNGTLQDN            | -----      | DG           | STALS                     | -IALEAGHKDIAVLLYAHL-NFS-K | ---                 | PQSP            | -----            | ST         |                 |
| Aligator KANK1      | EG    | STALM | CASEHGHVEIVKLLLA  | Q-PGCNGTLEDN            | -----      | DG           | STALS                     | -IALEAGHKDIAVLLYAHL-NFS-K | ---                 | TQSP            | -----            | GT         |                 |
| Spotted gar Kank1   | EG    | STALM | CASEHGHVEIVKLLLA  | Q-PGCDATLTDG            | -----      | DE           | STALS                     | -IALEAGHKDIAVLLYAHL-NFS-K | ---                 | AQSP            | -----            | GT         |                 |
| Herring Kank1       | EG    | STALM | CASEHGHVEIVKLLLA  | Q-SGCDATLSDS            | -----      | DE           | SNALS                     | -IALEAGHKDIAVLLYAHL-NFS-K | ---                 | AQSP            | -----            | GT         |                 |
| Zebrafish Kank1a    | EG    | STALM | CASEHGHVEIVKLLLA  | Q-PGCDPTLSDN            | -----      | DE           | SNALS                     | -IALEAGHKDIAVLLYAHL-NFS-K | ---                 | AQSPSVFNLSVTGIL | -----            |            |                 |
| Cave fish Kank1a    | EG    | STALM | CASEHGHVEIVKLLLA  | Q-PGCDATLSDN            | -----      | DE           | STALS                     | -IALEAGHKDIAVLLYAHL-NFS-K | ---                 | AQSP            | -----            | GT         |                 |
| Stickleback Kank1a  | EG    | STALM | CASEHGHVEIVKLLLA  | R-AGCDATLSDS            | -----      | DE           | SNALS                     | -IALEAGHKDIAMLIYAHV-NFS-K | ---                 | AQSP            | -----            | GT         |                 |
| Medaka Kank1a       | EG    | STALM | CASEHGHVEIVKLLLA  | Q-PGCDATLSDG            | -----      | DG           | SSALS                     | -IALEAGHKDIAVLLYAHL-NFS-K | ---                 | AQSP            | -----            | GT         |                 |
| Fugu Kank1a         | EG    | STALM | CASEHGHVEIVKLLLA  | Q-PGCDATLSDS            | -----      | DE           | SNALS                     | -IALEAGHKDIAVLLYAHL-NFS-K | ---                 | AQSP            | -----            | GT         |                 |
| Tetradon Kank1a     | EG    | STALM | CASEHGHVEIVKLLLA  | Q-PGCDATLSDS            | -----      | DE           | SNALS                     | -IALEAGHKDIAVLLYAHL-NFS-K | ---                 | AQSP            | -----            | GT         |                 |
| Tilapia Kank1a      | EG    | STALM | CASEHGHVEIVKLLLA  | Q-PGCDATLSDS            | -----      | DE           | SSALS                     | -IALEAGHKDIAVLLYAHL-NFS-K | ---                 | AQSP            | -----            | GT         |                 |
| Amazon molly Kank1a | EG    | STALM | CASEHGHVEIVKLLLA  | Q-AGCNATLSDS            | -----      | DG           | SNALS                     | -IALEAGHKDIAVLLYAHL-NFS-K | ---                 | AQSP            | -----            | GT         |                 |
| Mouse KANK3         | DG    | A     | TALM              | CASEYGR                 | LDTVQLLLA  | Q-PGCDLTILDN | -----                     | EG                        | T                   | S               | A                | -IALEAEQ   | DEVAALLHAHL     |
| Rat KANK3           | DG    | A     | TALM              | CASEYGR                 | LDTVQLLLA  | Q-PGCDLTILDN | -----                     | EG                        | T                   | S               | A                | -IALEAEQ   | DEVAALLHAHL     |
| Dog KANK3           | DG    | A     | TALM              | CASEYGR                 | LDTVRLLLA  | Q-PGCDPALD   | N-----                    | EG                        | T                   | S               | A                | -IALEAEQ   | DEVAALLHAHL     |
| Human KANK3         | DG    | A     | TALM              | CASEYGR                 | LDTVRLLLA  | Q-PGCDPALD   | N-----                    | EG                        | T                   | S               | A                | -IALEAEQ   | DEVAALLHAHL     |
| Lamprey             | DG    | STALM | CASEHGHVDIVRLLLA  | Q-PGCNAAIADNLWHLGCVCAQD | GS         | STALS        | -IALEAGHNDIAVLLYAHL-NYA-K | -----                     | -----               | -----           | -----            |            |                 |
| Coelacanth KANK3    | EG    | STALM | CASEHGRVEIVKLLLA  | Q-AGCDISILDN            | -----      | DG           | SSALS                     | -IALEANHNDIAVLLYAHL-NFS-K | ---                 | AQSPQ           | -----            | AT         |                 |
| Frog Kank3          | EG    | STALM | CASEHGRAEIVKLLLA  | Q-TDCDVSTITDN           | -----      | DG           | SNALS                     | -IALEAGQNDIAMLIYAHV-NFS-K | ---                 | VQSP            | -----            |            |                 |
| Turtle KANK3        | EG    | STALM | CACEHGRLETIVRLLLA | Q-PACDVSIVDN            | -----      | DG           | N                         | N                         | A                   | V               | A                | -IALEAGHSN | IAVLMYAHL-NNS-K |
| Aligator KANK3      | EG    | STALM | CACEHGRVETIVRLLLA | Q-PVCDLSIVDN            | -----      | DG           | N                         | N                         | A                   | V               | A                | -IALEAGHSN | IAVLMYAHL-NSS-K |
| Eagle KANK3         | EG    | STALM | CACEHGRVETIVKLLLA | Q-PTCNISIVDS            | -----      | DG           | N                         | N                         | A                   | V               | A                | -IALEAGHSN | IAVLLYAHL-NGT-K |
| Chicken KANK3       | EG    | STALM | CACEHGRVETIVKLLLA | Q-PTCDVSIVDS            | -----      | DG           | N                         | N                         | A                   | V               | A                | -IALEAGHSN | IAVLLYAHL-NGT-K |
| Goose KANK3         | EG    | STALM | CACEHGRVETIVKLLLA | Q-PTCNISIVDS            | -----      | DG           | N                         | N                         | A                   | V               | A                | -IALEAGHSN | IAVLLYAHL-NGT-K |

Spotted gar Kank3 YKRQICRCNTNHKRTKKIHNVLCF-DFLQASFWNL-----DGSNALS-IALEASHNDIAVLLYAHM-NYS-N---SQAA-----R--  
 Zebrafish Kank3 EGSTALMCASEHGRAEIVSLLLEQ-PGCDISIVDN-----DGSNALS-IALEASHNDIAVLLYAHM-NYS-K---TQADA-----S---  
 Cavefish Kank3 EGSTALMCASEHGRAEIVSLLLEQ-AGCDISIVDN-----DGSNALS-IALEASHNDIAVLLYAHM-NYS-K---AQGEA-----QV--  
 Herring Kank3 EGSTALMCASEHGRAEIVAMLLDQ-LDCDISVVDN-----DGSNALS-IALEASHNDIAVLLYAHM-NYS-K---SQAA-----GV--  
 Stickleback Kank3 EGSTALMCASEHGRAEIVKLLLEQ-PGCDISIVDN-----DGSNALS-IALEASHNDIAVLLYAHM-NYA-R---TPPV-----GS--  
 Fugu Kank3 EGSTALMCASEHGRAEIVKLLER-PGCDISIVDN-----DGSNALS-IALEASHNDIAVLLYAHM-NYA-K---TQSAV-----  
 Tetradon Kank3 EGSTALMCASEHGRAEIVQLLLEQ-PGCDISIVDN-----DGSNALS-IALEASHNDIAVLLYAHM-NYA-K---NQSAG-----  
 Medaka Kank3 EGSTALMCASEHGRAEIVKLLLEQ-PGCDISIVDN-----DGSNALS-IALEAASHNDIAVLLYAHM-NYA-K---APSPA-----GS--  
 Tilapia Kank3 EGSTALMCASEHGRTEIVKLLLEQ-PGCDISIVDN-----DGSNALS-IALEASHNDIAVLLYAHM-NYA-K---  
 Amazon molly Kank3 EGSTALMCASEHGRAEIVKLLLEQ-PGCDISIVDN-----DGSNALS-IALEAASHNDIAVLLYAHM-KYA-K---SQTTL-----GS--  
 Platyfish Kank3 EGSTALMCASEHGRAEIVKLLLEQ-PGCDISIVDN-----DGSNALS-IALEAASHNDIAVLLYAHM-NYA-K---SQTTL-----GS--

3010 3020 3030 3040 3050 3060 3070 3080 3090

Hydra .....  
 Trichoplax -----SKTSKAHS-----  
 Aplasia -----GVHRKRKSSSSPTPSSFEELR-----  
 Snail -----RPARGYHKRKRKSSSSPTPSSFEIHF-----  
 Fruitfly -----NRGDATRSSLISPPRHKRQPSQ-----  
 Hookworm -----AETIEDT-----  
 C.elegance -----RLDISGPTSTI-----  
 Tunicate -----RSRPRVDGAKQKSSPVHRKTKS-----  
 Spider TPPPRTPTLR---TPPLPSPSARSTNSIPASFHFPS-----  
 Lingula -----SHKEGSMASRLPVSLSKK-----  
 Lancelet -----TAPGGGKGRRRLSPSPTRRKS-----  
 Medaka Kank4b -----LSAVRPPDFNDNMPPVRLLD-----  
 Amazon molly Kank4b -----  
 Platyfish Kank4b -----  
 Stickleback Kank4b -----  
 Fugu Kank4b -----  
 Tetraon Kank4b -----  
 Cave fish Kank4b -----  
 Medaka Kank4a -----  
 Fugu Kank4a -----  
 Tetradon Kank4a -----EASSTADL-----  
 Stickleback Kank4a -----TRGPESFETT-----  
 Tilapia Kank4a -----VQTSESTSTADLL-----  
 Platyfish Kank4a -----SEPMSAADLL-----  
 Amazon Molly Kank4a -----SEPMSAADLL-----  
 Herring Kank4 -----TLQAAAPH-----  
 Zebrafish Kank4 -----VTDSAAPL-----  
 Cave fish Kank4a -----EKAGSSQAAGLL-----  
 Mouse KANK4 -----RSLGPKELQKN-----  
 Rat KANK4 -----RSLGLKELQKN-----  
 Dog KANK4 -----  
 Human KANK4 -----  
 Eagle KANK4 -----EQSPSLSA-----  
 Chicken KANK4 -----  
 Goose KANK4 -----CRASPRPGLLGAHLSPGGVGWRGLVQPHPR-----  
 Anole lizard KANK4 -----  
 Turtle KANK4 -----  
 Aligator KANK4 -----  
 Frog Kank2 -----DPKR-----QRVNPSDESQ-----  
 Mouse KANK2 -----MSDYESPASSSAEE-----  
 Rat KANK2 -----MSDYESPASSSAEE-----  
 Dog KANK2 -----MSDDESPASSSAEE-----  
 Human KANK2 -----MSDDESPASSSAEE-----



|                     |                                                                                                     |
|---------------------|-----------------------------------------------------------------------------------------------------|
| Aligator KANK2      | -----VTTE-----TAVTTEAPGDTQ-----                                                                     |
| Spotted gar Kank2   | QNNPQVRRTP-----RQLSPAPSPPIHQDQOTDGGRGASLEVGAGEAWLGLWDKGOOETGPGAESFFHFGFFRPANKPPRPPAALSAERPRGEREVLGS |
| Cave fish Kank2     | -----PKSP-----ILGSPSSSELK-----                                                                      |
| Herring Kank2       | -----PKSP-----LLGSSPPTGEMK-----                                                                     |
| Zebrafish Kank2     | -----PKSP-----ILGSSPPSSSELK-----                                                                    |
| Tetradon Kank2      | -----QVSEKSPILLGSSPP-----                                                                           |
| Fugu Kank2          | -----VGKDQSPTSASAKK-----                                                                            |
| Medaka Kank2        | -----EKKNSAPKSDGFEQ-----                                                                            |
| Sticklebac Kank2    | -----SSIQQSPQKGSATE-----                                                                            |
| Tilapia Kank2       | -----LSNKSLPRLSTHPIH-----                                                                           |
| Amazon molly Kank2  | -----VSPKSPILLGSSPPSGEPK-----                                                                       |
| Platyfish Kank2     | -----TELSWNVPGSGKLEN-----                                                                           |
| Coelacanth KANK2    | -----KETQPGPPPNAPAEAAQQ-----                                                                        |
| Anole lizard KANK2  | -----PKQP-----KPDNTALTSSDNNTKDDGGTSH-----                                                           |
| Turtle KANK2        | -----PKQP-----KAETAAAVLPPEAQ-----                                                                   |
| Tetradon Kank1b     | -----                                                                                               |
| Medaka Kank1b       | -----ARRS-----GRFSSSSGGRSVFE-----                                                                   |
| Amazon molly Kank1b | -----ARHG-----GRFPSSSSGGWSIFET-----                                                                 |
| Platyfish Kank1b    | -----ARHS-----GRFPSSSSGGWSIFET-----                                                                 |
| Frog Kank4          | -----SRSAAEEMKGAFL-----                                                                             |
| Zebrafish Kank1b    | -----PR-----SKTPPASRTSS-SD-----                                                                     |
| Tilapia Kank1b      | -----PR-----SKTPPASRTSS-SD-----                                                                     |
| Fugu Kank1b         | -----PR-----SKTPPASRTSS-SD-----                                                                     |
| Cavefish Kank1b     | -----PR-----SRTPPAAAARGFFE-----                                                                     |
| Spotted gar Kank4   | -----DHGTPDTS-----                                                                                  |
| Coelacanth KANK4    | -----                                                                                               |
| Frog Kank1          | -----PRLS-----RKFPSPPTQKGPTDH-----                                                                  |
| Shark Kank1         | -----PRLG-----RKTSPSPTRRSKFE-----                                                                   |
| Coelacanth KANK1    | -----                                                                                               |
| Mouse KANK1         | -----PRLG-----RKTSPGPTHRSFDF-----                                                                   |
| Rat KANK1           | -----PRLG-----RKTSPGPTHRSFDF-----                                                                   |
| Dog KANK1           | -----PRLG-----RKTSPAPTHRSSFD-----                                                                   |
| Human KANK1         | -----PRLG-----RKTSPGPTHRSFDF-----                                                                   |
| Anole lizard KANK1  | -----PRLG-----RKPSPGPAHRSPFDC-----                                                                  |
| Eagle KANK1         | -----PRLS-----RRTSPGPTHRAFTE-----                                                                   |
| Chicken KANK1       | -----PRLS-----RKTSPGPTHRAFTE-----                                                                   |
| Goose KANK1         | -----PRLS-----RKTSPGPTHRAFTE-----                                                                   |
| Turtle KANK1        | -----PRLS-----RKTSPGPTRRAMFD-----                                                                   |
| Aligator KANK1      | -----PRLG-----RKTSPGPTHRTFE-----                                                                    |
| Spotted gar Kank1   | -----PRLG-----RKTSPSPTRRSMEFD-----                                                                  |
| Herring Kank1       | -----PRLS-----RKMSPSPTRKSADF-----                                                                   |
| Zebrafish Kank1a    | -----CRQGVYIINRIVPTNLFRRPMVEDNVSSSVCMFA-----                                                        |
| Cave fish Kank1a    | -----PRLG-----RKTSPSPTRRGMEFD-----                                                                  |
| Stickleback Kank1a  | -----PRLS-----RKTSPSPTRQGVFD-----                                                                   |
| Medaka Kank1a       | -----PRLS-----RKASPSPTRRSVFD-----                                                                   |
| Fugu Kank1a         | -----PRLG-----RKMSPSPTRRSMFD-----                                                                   |
| Tetradon Kank1a     | -----PRLG-----RKMSPSPTRRGMFD-----                                                                   |
| Tilapia Kank1a      | -----PRLG-----RKTSPSPTRRGMEFD-----                                                                  |
| Amazon molly Kank1a | -----PRLG-----RKTSPSPTRRGLEFD-----                                                                  |
| Mouse KANK3         | -----SNH-----QGSSSTGSPTAKECNDK-----                                                                 |
| Rat KANK3           | -----GSPTATLQRDTGPQL-----                                                                           |
| Dog KANK3           | -----LESTPDVPDEGECSDHREDPQPQ-----                                                                   |
| Human KANK3         | -----AGVQRHNLSSLQPPPRFKKFSCLSLPSSWDYNSCEPSRLAQLTIF-----                                             |
| Lamprey             | -----PPSPVSTSG-----                                                                                 |
| Coelacanth KANK3    | -----PKMG-----LKSAANTAKKSVVE-----                                                                   |
| Frog Kank3          | -----SSDVLAMGKASSSHGKPE-----                                                                        |
| Turtle KANK3        | -----QETPPIALKSSSNLMKKH-----                                                                        |

|                    |                                    |
|--------------------|------------------------------------|
| Aligator KANK3     | -----QGKSPTIPRKQH-----             |
| Eagle KANK3        | -----SLTA-----MKSPGSPKPN-----      |
| Chicken KANK3      | -----STAG-----TKSPGSPKPN-----      |
| Goose KANK3        | -----STAG-----TKSPGNPKKLN-----     |
| Spotted gar Kank3  | -----SLLA-----SRSDSSRVRTSPSL-----  |
| Zebrafish Kank3    | -----PKAN-----SRSPSSPRKTWPSE-----  |
| Cavefish Kank3     | -----PKAN-----PRSPSSPRKLWPSE-----  |
| Herring Kank3      | -----NKGN-----TRSPSTSPQKWPPE-----  |
| Stickleback Kank3  | -----PTVQ-----PRSPSTSSHKSWPSD----- |
| Fugu Kank3         | -----VSPSSRPSLPGDKM-----           |
| Tetradon Kank3     | -----VSPSSRPCQPG-----              |
| Medaka Kank3       | -----PKSQ-----ARSPSTSPHKSWPAE----- |
| Tilapia Kank3      | -----TQTAAETLLHTAIECNSE-----       |
| Amazon molly Kank3 | -----PKAQ-----PRSPTNPHKSWPAD-----  |
| Platyfish Kank3    | -----PKAQ-----PRSPTNPHKSWPAD-----  |
